# Supplementary material for: Fungal xenosiderophores from mycobiota and diet promote Salmonella colonization of the inflamed gut
Source: Research Square preprint supplement (doi:10.21203/rs.3.rs-1175303/v1), 2022-01-05
Supplement: Supplementary file 1 [file 23e22aaee7b70354d17ad2f0.xlsx]

## Sheet: Sheet1
Relative abundance ITS mice fed chow LM485 to chow 2914 (related to figure 2I)
OTU	Abundance	Mouse	Diet	Kingdom	Phylum	Class	Order	Family	Genus
ASV 2	0.382662	UIC127	chow LM485	Fungi	Ascomycota	Eurotiomycetes	Eurotiales	Aspergillaceae	Aspergillus
ASV 3	0.104997	UIC127	chow LM485	Fungi	Ascomycota	Dothideomycetes	Capnodiales	Cladosporiaceae	Cladosporium
ASV 78	0.0891966	UIC127	chow LM485	Fungi	Mucoromycota	Mucoromycetes	Mucorales	Lichtheimiaceae	Lichtheimia
ASV 16	0.0753505	UIC127	chow LM485	Fungi	Ascomycota	Eurotiomycetes	Eurotiales	Aspergillaceae	Penicillium
ASV 12	0.0370697	UIC127	chow LM485	Fungi	Ascomycota	Sordariomycetes	Diaporthales	Diaporthaceae	Stenocarpella
ASV 6	0.0315	UIC127	chow LM485	Fungi	Ascomycota	Dothideomycetes	Pleosporales	Pleosporaceae	Alternaria
ASV 7	0.02716	UIC127	chow LM485	Fungi	Ascomycota	Eurotiomycetes	Eurotiales	Trichocomaceae	Talaromyces
ASV 36	0.0265085	UIC127	chow LM485	Fungi	Ascomycota	Sordariomycetes	Hypocreales	Hypocreaceae	Trichoderma
ASV 17	0.0244073	UIC127	chow LM485	Fungi	Ascomycota	Sordariomycetes	Microascales	Microascaceae	Microascus
ASV 74	0.0173879	UIC127	chow LM485	Fungi	Basidiomycota	Ustilaginomycetes	Ustilaginales	Ustilaginaceae	Ustilago
ASV 18	0.0147269	UIC127	chow LM485	Fungi	Basidiomycota	Tremellomycetes	Tremellales	Bulleribasidiaceae	Vishniacozyma
ASV 9	0.0130845	UIC127	chow LM485	Fungi	Ascomycota	Dothideomycetes	Capnodiales	Mycosphaerellaceae	Mycosphaerella
ASV 205	0.0110108	UIC127	chow LM485	Fungi	Mucoromycota	Mucoromycetes	Mucorales	Mucoraceae	Mucor
ASV 310	0.0106621	UIC127	chow LM485	Fungi	Basidiomycota	Agaricomycetes	Agaricales	o__Agaricales	o__Agaricales
ASV 100	0.010552	UIC127	chow LM485	Fungi	Ascomycota	Dothideomycetes	Pleosporales	Didymellaceae	Didymella
ASV 84	0.0102767	UIC127	chow LM485	Fungi	Basidiomycota	Cystobasidiomycetes	Cystobasidiomycetes_ord_Incertae_sedis	Symmetrosporaceae	Symmetrospora
ASV 94	0.00996477	UIC127	chow LM485	Fungi	Basidiomycota	Agaricomycetes	c__Agaricomycetes	c__Agaricomycetes	Other <1%
ASV 355	0.00885451	UIC127	chow LM485	Fungi	Basidiomycota	Agaricomycetes	Corticiales	Corticiaceae	Other <1%
ASV 25	0.00835903	UIC127	chow LM485	Fungi	Basidiomycota	Wallemiomycetes	Wallemiales	Wallemiaceae	Other <1%
ASV 45	0.00763415	UIC127	chow LM485	Fungi	Chytridiomycota	Rhizophydiomycetes	Rhizophydiales	Aquamycetaceae	Other <1%
ASV 256	0.00733135	UIC127	chow LM485	Fungi	Ascomycota	Eurotiomycetes	Eurotiales	Thermoascaceae	Other <1%
ASV 157	0.0069368	UIC127	chow LM485	Fungi	Mucoromycota	Mucoromycetes	Mucorales	Lichtheimiaceae	Other <1%
ASV 365	0.00679916	UIC127	chow LM485	Fungi	Ascomycota	Dothideomycetes	Pleosporales	Phaeosphaeriaceae	Other <1%
ASV 114	0.00599171	UIC127	chow LM485	Fungi	Basidiomycota	Agaricomycetes	Phallales	Phallaceae	Other <1%
ASV 445	0.00590912	UIC127	chow LM485	Fungi	Ascomycota	Sordariomycetes	Glomerellales	Plectosphaerellaceae	Other <1%
ASV 31	0.00547787	UIC127	chow LM485	Fungi	Ascomycota	Dothideomycetes	Pleosporales	Didymellaceae	Other <1%
ASV 506	0.0045236	UIC127	chow LM485	Fungi	Ascomycota	Sordariomycetes	Hypocreales	Nectriaceae	Other <1%
ASV 518	0.00421163	UIC127	chow LM485	Fungi	Ascomycota	Sordariomycetes	Glomerellales	Glomerellaceae	Other <1%
ASV 533	0.00400976	UIC127	chow LM485	Fungi	Basidiomycota	Agaricomycetes	Agaricales	Psathyrellaceae	Other <1%
ASV 471	0.00394553	UIC127	chow LM485	Fungi	Ascomycota	Eurotiomycetes	Chaetothyriales	Herpotrichiellaceae	Other <1%
ASV 295	0.00374367	UIC127	chow LM485	Fungi	Basidiomycota	Ustilaginomycetes	Ustilaginales	Ustilaginaceae	Other <1%
ASV 597	0.00353263	UIC127	chow LM485	Fungi	Mucoromycota	Mucoromycetes	Mucorales	Rhizopodaceae	Other <1%
ASV 442	0.00304632	UIC127	chow LM485	Fungi	Basidiomycota	Ustilaginomycetes	Ustilaginales	Ustilaginaceae	Other <1%
ASV 631	0.00277105	UIC127	chow LM485	Fungi	Basidiomycota	Agaricomycetes	Agaricales	Bolbitiaceae	Other <1%
ASV 62	0.00274352	UIC127	chow LM485	Fungi	Basidiomycota	Ustilaginomycetes	Ustilaginales	Ustilaginaceae	Other <1%
ASV 553	0.00186266	UIC127	chow LM485	Fungi	Basidiomycota	Tremellomycetes	Cystofilobasidiales	Mrakiaceae	Other <1%
ASV 8	0.00172502	UIC127	chow LM485	Fungi	Ascomycota	Dothideomycetes	Pleosporales	Didymellaceae	Other <1%
ASV 842	0.00141305	UIC127	chow LM485	Fungi	Ascomycota	Saccharomycetes	Saccharomycetales	Saccharomycetaceae	Other <1%
ASV 364	0.00125707	UIC127	chow LM485	Fungi	Basidiomycota	Ustilaginomycetes	Ustilaginales	Ustilaginaceae	Other <1%
ASV 598	0.00116531	UIC127	chow LM485	Fungi	Mucoromycota	Mucoromycetes	Mucorales	Mucoraceae	Other <1%
ASV 1	3.67026e-05	UIC127	chow LM485	Fungi	Ascomycota	Saccharomycetes	Saccharomycetales	Saccharomycetales_fam_Incertae_sedis	Other <1%
ASV 1009	3.67026e-05	UIC127	chow LM485	Fungi	Mucoromycota	Mucoromycetes	Mucorales	Syncephalastraceae	Other <1%
ASV 40	3.67026e-05	UIC127	chow LM485	Fungi	Ascomycota	Dothideomycetes	Capnodiales	Mycosphaerellaceae	Other <1%
ASV 27	1.83513e-05	UIC127	chow LM485	Fungi	Ascomycota	Dothideomycetes	Dothideales	Aureobasidiaceae	Other <1%
ASV 38	1.83513e-05	UIC127	chow LM485	Fungi	Ascomycota	Dothideomycetes	Capnodiales	Teratosphaeriaceae	Other <1%
ASV 397	1.83513e-05	UIC127	chow LM485	Fungi	Basidiomycota	p__Basidiomycota	p__Basidiomycota	p__Basidiomycota	Other <1%
ASV 120	9.17566e-06	UIC127	chow LM485	Fungi	Ascomycota	Sordariomycetes	Trichosphaeriales	Trichosphaeriaceae	Other <1%
ASV 132	9.17566e-06	UIC127	chow LM485	Fungi	Basidiomycota	Tremellomycetes	Tremellales	Bulleribasidiaceae	Other <1%
ASV 192	9.17566e-06	UIC127	chow LM485	Fungi	Ascomycota	Sordariomycetes	Hypocreales	Bionectriaceae	Other <1%
ASV 317	9.17566e-06	UIC127	chow LM485	Fungi	Ascomycota	Sordariomycetes	Microascales	Microascaceae	Other <1%
ASV 33	9.17566e-06	UIC127	chow LM485	Fungi	Basidiomycota	Microbotryomycetes	Sporidiobolales	Sporidiobolaceae	Other <1%
ASV 53	9.17566e-06	UIC127	chow LM485	Fungi	Basidiomycota	Tremellomycetes	Filobasidiales	Filobasidiaceae	Other <1%
ASV 54	9.17566e-06	UIC127	chow LM485	Fungi	Basidiomycota	Tremellomycetes	Tremellales	Tremellaceae	Other <1%
ASV 560	9.17566e-06	UIC127	chow LM485	Fungi	Ascomycota	Sordariomycetes	Hypocreales	Nectriaceae	Other <1%
ASV 2	0.447173	UIC127	chow 2914	Fungi	Ascomycota	Eurotiomycetes	Eurotiales	Aspergillaceae	Aspergillus
ASV 12	0.139061	UIC127	chow 2914	Fungi	Ascomycota	Sordariomycetes	Diaporthales	Diaporthaceae	Stenocarpella
ASV 16	0.0624438	UIC127	chow 2914	Fungi	Ascomycota	Eurotiomycetes	Eurotiales	Aspergillaceae	Penicillium
ASV 18	0.0495568	UIC127	chow 2914	Fungi	Basidiomycota	Tremellomycetes	Tremellales	Bulleribasidiaceae	Vishniacozyma
ASV 6	0.0473168	UIC127	chow 2914	Fungi	Ascomycota	Dothideomycetes	Pleosporales	Pleosporaceae	Alternaria
ASV 3	0.0436526	UIC127	chow 2914	Fungi	Ascomycota	Dothideomycetes	Capnodiales	Cladosporiaceae	Cladosporium
ASV 33	0.0174362	UIC127	chow 2914	Fungi	Basidiomycota	Microbotryomycetes	Sporidiobolales	Sporidiobolaceae	Sporobolomyces
ASV 124	0.0157354	UIC127	chow 2914	Fungi	Ascomycota	Sordariomycetes	Hypocreales	Hypocreales_fam_Incertae_sedis	Olpitrichum
ASV 1	0.0148643	UIC127	chow 2914	Fungi	Ascomycota	Saccharomycetes	Saccharomycetales	Saccharomycetales_fam_Incertae_sedis	Candida
ASV 9	0.0124722	UIC127	chow 2914	Fungi	Ascomycota	Dothideomycetes	Capnodiales	Mycosphaerellaceae	Mycosphaerella
ASV 213	0.0114766	UIC127	chow 2914	Fungi	Ascomycota	Eurotiomycetes	Eurotiales	Trichocomaceae	Thermomyces
ASV 36	0.011283	UIC127	chow 2914	Fungi	Ascomycota	Sordariomycetes	Hypocreales	Hypocreaceae	Trichoderma
ASV 53	0.010882	UIC127	chow 2914	Fungi	Basidiomycota	Tremellomycetes	Filobasidiales	Filobasidiaceae	Filobasidium
ASV 7	0.00977586	UIC127	chow 2914	Fungi	Ascomycota	Eurotiomycetes	Eurotiales	Trichocomaceae	Other <1%
ASV 440	0.00904302	UIC127	chow 2914	Fungi	Ascomycota	Leotiomycetes	Thelebolales	Pseudeurotiaceae	Other <1%
ASV 132	0.00865585	UIC127	chow 2914	Fungi	Basidiomycota	Tremellomycetes	Tremellales	Bulleribasidiaceae	Other <1%
ASV 427	0.00813042	UIC127	chow 2914	Fungi	Basidiomycota	Cystobasidiomycetes	Cystobasidiales	Cystobasidiaceae	Other <1%
ASV 25	0.00777091	UIC127	chow 2914	Fungi	Basidiomycota	Wallemiomycetes	Wallemiales	Wallemiaceae	Other <1%
ASV 52	0.00748054	UIC127	chow 2914	Fungi	Basidiomycota	Tremellomycetes	Tremellales	Tremellaceae	Other <1%
ASV 100	0.00739757	UIC127	chow 2914	Fungi	Ascomycota	Dothideomycetes	Pleosporales	Didymellaceae	Other <1%
ASV 317	0.00728696	UIC127	chow 2914	Fungi	Ascomycota	Sordariomycetes	Microascales	Microascaceae	Other <1%
ASV 120	0.00703807	UIC127	chow 2914	Fungi	Ascomycota	Sordariomycetes	Trichosphaeriales	Trichosphaeriaceae	Other <1%
ASV 364	0.00536497	UIC127	chow 2914	Fungi	Basidiomycota	Ustilaginomycetes	Ustilaginales	Ustilaginaceae	Other <1%
ASV 27	0.00512991	UIC127	chow 2914	Fungi	Ascomycota	Dothideomycetes	Dothideales	Aureobasidiaceae	Other <1%
ASV 94	0.00512991	UIC127	chow 2914	Fungi	Basidiomycota	Agaricomycetes	c__Agaricomycetes	c__Agaricomycetes	Other <1%
ASV 493	0.00474274	UIC127	chow 2914	Fungi	Basidiomycota	Tremellomycetes	Cystofilobasidiales	Mrakiaceae	Other <1%
ASV 613	0.0044662	UIC127	chow 2914	Fungi	Ascomycota	Eurotiomycetes	Onygenales	Eremascaceae	Other <1%
ASV 442	0.00435558	UIC127	chow 2914	Fungi	Basidiomycota	Ustilaginomycetes	Ustilaginales	Ustilaginaceae	Other <1%
ASV 339	0.00311113	UIC127	chow 2914	Fungi	Ascomycota	Sordariomycetes	Xylariales	Hyponectriaceae	Other <1%
ASV 295	0.00280693	UIC127	chow 2914	Fungi	Basidiomycota	Ustilaginomycetes	Ustilaginales	Ustilaginaceae	Other <1%
ASV 314	0.00277928	UIC127	chow 2914	Fungi	Ascomycota	Sordariomycetes	Microascales	Microascaceae	Other <1%
ASV 78	0.0022815	UIC127	chow 2914	Fungi	Mucoromycota	Mucoromycetes	Mucorales	Lichtheimiaceae	Other <1%
ASV 205	0.00215705	UIC127	chow 2914	Fungi	Mucoromycota	Mucoromycetes	Mucorales	Mucoraceae	Other <1%
ASV 41	0.00153482	UIC127	chow 2914	Fungi	Ascomycota	Sordariomycetes	Hypocreales	Nectriaceae	Other <1%
ASV 228	5.5309e-05	UIC127	chow 2914	Fungi	Basidiomycota	Exobasidiomycetes	Entylomatales	Entylomatales_fam_Incertae_sedis	Other <1%
ASV 122	1.38272e-05	UIC127	chow 2914	Fungi	Basidiomycota	Microbotryomycetes	Sporidiobolales	Sporidiobolaceae	Other <1%
ASV 123	1.38272e-05	UIC127	chow 2914	Fungi	Ascomycota	Sordariomycetes	Xylariales	Xylariaceae	Other <1%
ASV 1483	1.38272e-05	UIC127	chow 2914	Fungi	Ascomycota	Eurotiomycetes	Onygenales	o__Onygenales	Other <1%
ASV 1575	1.38272e-05	UIC127	chow 2914	Fungi	Basidiomycota	Agaricomycetes	Agaricales	Lyophyllaceae	Other <1%
ASV 17	1.38272e-05	UIC127	chow 2914	Fungi	Ascomycota	Sordariomycetes	Microascales	Microascaceae	Other <1%
ASV 171	1.38272e-05	UIC127	chow 2914	Fungi	Basidiomycota	Microbotryomycetes	Sporidiobolales	Sporidiobolaceae	Other <1%
ASV 350	1.38272e-05	UIC127	chow 2914	Fungi	Ascomycota	Sordariomycetes	Hypocreales	Hypocreales_fam_Incertae_sedis	Other <1%
ASV 430	1.38272e-05	UIC127	chow 2914	Fungi	Basidiomycota	Tremellomycetes	Cystofilobasidiales	Cystofilobasidiaceae	Other <1%
ASV 79	1.38272e-05	UIC127	chow 2914	Fungi	Basidiomycota	Tremellomycetes	Tremellales	Rhynchogastremataceae	Other <1%
ASV 8	1.38272e-05	UIC127	chow 2914	Fungi	Ascomycota	Dothideomycetes	Pleosporales	Didymellaceae	Other <1%
ASV 91	1.38272e-05	UIC127	chow 2914	Fungi	Basidiomycota	Tremellomycetes	Trichosporonales	Trichosporonaceae	Other <1%
ASV 2	0.208975	UIC128	chow LM485	Fungi	Ascomycota	Eurotiomycetes	Eurotiales	Aspergillaceae	Aspergillus
ASV 18	0.169314	UIC128	chow LM485	Fungi	Basidiomycota	Tremellomycetes	Tremellales	Bulleribasidiaceae	Vishniacozyma
ASV 3	0.0899388	UIC128	chow LM485	Fungi	Ascomycota	Dothideomycetes	Capnodiales	Cladosporiaceae	Cladosporium
ASV 17	0.0563009	UIC128	chow LM485	Fungi	Ascomycota	Sordariomycetes	Microascales	Microascaceae	Microascus
ASV 79	0.0483716	UIC128	chow LM485	Fungi	Basidiomycota	Tremellomycetes	Tremellales	Rhynchogastremataceae	Papiliotrema
ASV 9	0.0477268	UIC128	chow LM485	Fungi	Ascomycota	Dothideomycetes	Capnodiales	Mycosphaerellaceae	Mycosphaerella
ASV 78	0.0456553	UIC128	chow LM485	Fungi	Mucoromycota	Mucoromycetes	Mucorales	Lichtheimiaceae	Lichtheimia
ASV 36	0.0415809	UIC128	chow LM485	Fungi	Ascomycota	Sordariomycetes	Hypocreales	Hypocreaceae	Trichoderma
ASV 16	0.0375477	UIC128	chow LM485	Fungi	Ascomycota	Eurotiomycetes	Eurotiales	Aspergillaceae	Penicillium
ASV 6	0.0367383	UIC128	chow LM485	Fungi	Ascomycota	Dothideomycetes	Pleosporales	Pleosporaceae	Alternaria
ASV 12	0.0186709	UIC128	chow LM485	Fungi	Ascomycota	Sordariomycetes	Diaporthales	Diaporthaceae	Stenocarpella
ASV 285	0.0174088	UIC128	chow LM485	Fungi	Basidiomycota	Tremellomycetes	Tremellales	Trimorphomycetaceae	Saitozyma
ASV 205	0.0165309	UIC128	chow LM485	Fungi	Mucoromycota	Mucoromycetes	Mucorales	Mucoraceae	Mucor
ASV 452	0.0109611	UIC128	chow LM485	Fungi	Basidiomycota	Malasseziomycetes	Malasseziales	Malasseziaceae	Malassezia
ASV 7	0.010577	UIC128	chow LM485	Fungi	Ascomycota	Eurotiomycetes	Eurotiales	Trichocomaceae	Talaromyces
ASV 31	0.0100831	UIC128	chow LM485	Fungi	Ascomycota	Dothideomycetes	Pleosporales	Didymellaceae	Epicoccum
ASV 74	0.00956183	UIC128	chow LM485	Fungi	Basidiomycota	Ustilaginomycetes	Ustilaginales	Ustilaginaceae	Other <1%
ASV 25	0.00953439	UIC128	chow LM485	Fungi	Basidiomycota	Wallemiomycetes	Wallemiales	Wallemiaceae	Other <1%
ASV 447	0.00880731	UIC128	chow LM485	Fungi	Basidiomycota	Ustilaginomycetes	Urocystidales	Glomosporiaceae	Other <1%
ASV 228	0.00842319	UIC128	chow LM485	Fungi	Basidiomycota	Exobasidiomycetes	Entylomatales	Entylomatales_fam_Incertae_sedis	Other <1%
ASV 149	0.00736686	UIC128	chow LM485	Fungi	Basidiomycota	Tremellomycetes	Trichosporonales	Trichosporonaceae	Other <1%
ASV 41	0.00692787	UIC128	chow LM485	Fungi	Ascomycota	Sordariomycetes	Hypocreales	Nectriaceae	Other <1%
ASV 122	0.00668093	UIC128	chow LM485	Fungi	Basidiomycota	Microbotryomycetes	Sporidiobolales	Sporidiobolaceae	Other <1%
ASV 33	0.00659862	UIC128	chow LM485	Fungi	Basidiomycota	Microbotryomycetes	Sporidiobolales	Sporidiobolaceae	Other <1%
ASV 62	0.00633797	UIC128	chow LM485	Fungi	Basidiomycota	Ustilaginomycetes	Ustilaginales	Ustilaginaceae	Other <1%
ASV 540	0.00583038	UIC128	chow LM485	Fungi	Basidiomycota	Agaricomycetes	Geastrales	Geastraceae	Other <1%
ASV 558	0.00541883	UIC128	chow LM485	Fungi	Ascomycota	Sordariomycetes	Hypocreales	Cordycipitaceae	Other <1%
ASV 53	0.0047329	UIC128	chow LM485	Fungi	Basidiomycota	Tremellomycetes	Filobasidiales	Filobasidiaceae	Other <1%
ASV 610	0.00438994	UIC128	chow LM485	Fungi	Rozellomycota	p__Rozellomycota	p__Rozellomycota	p__Rozellomycota	Other <1%
ASV 10	0.00433506	UIC128	chow LM485	Fungi	Ascomycota	Sordariomycetes	Hypocreales	Clavicipitaceae	Other <1%
ASV 418	0.00430762	UIC128	chow LM485	Fungi	Ascomycota	Dothideomycetes	Pleosporales	Pleosporaceae	Other <1%
ASV 450	0.00415672	UIC128	chow LM485	Fungi	Ascomycota	Sordariomycetes	Hypocreales	Hypocreales_fam_Incertae_sedis	Other <1%
ASV 400	0.00392351	UIC128	chow LM485	Fungi	Basidiomycota	Agaricomycetes	Geastrales	Sphaerobolaceae	Other <1%
ASV 114	0.00385491	UIC128	chow LM485	Fungi	Basidiomycota	Agaricomycetes	Phallales	Phallaceae	Other <1%
ASV 295	0.00329245	UIC128	chow LM485	Fungi	Basidiomycota	Ustilaginomycetes	Ustilaginales	Ustilaginaceae	Other <1%
ASV 52	0.00286718	UIC128	chow LM485	Fungi	Basidiomycota	Tremellomycetes	Tremellales	Tremellaceae	Other <1%
ASV 204	0.00268884	UIC128	chow LM485	Fungi	Ascomycota	Sordariomycetes	Hypocreales	Clavicipitaceae	Other <1%
ASV 27	0.00257909	UIC128	chow LM485	Fungi	Ascomycota	Dothideomycetes	Dothideales	Aureobasidiaceae	Other <1%
ASV 836	0.00218125	UIC128	chow LM485	Fungi	Ascomycota	Dothideomycetes	Pleosporales	Periconiaceae	Other <1%
ASV 852	0.00194803	UIC128	chow LM485	Fungi	Basidiomycota	Microbotryomycetes	Leucosporidiales	Leucosporidiaceae	Other <1%
ASV 132	0.00149532	UIC128	chow LM485	Fungi	Basidiomycota	Tremellomycetes	Tremellales	Bulleribasidiaceae	Other <1%
ASV 365	0.00145417	UIC128	chow LM485	Fungi	Ascomycota	Dothideomycetes	Pleosporales	Phaeosphaeriaceae	Other <1%
ASV 598	0.00131698	UIC128	chow LM485	Fungi	Mucoromycota	Mucoromycetes	Mucorales	Mucoraceae	Other <1%
ASV 94	0.000727083	UIC128	chow LM485	Fungi	Basidiomycota	Agaricomycetes	c__Agaricomycetes	c__Agaricomycetes	Other <1%
ASV 1009	0.000507586	UIC128	chow LM485	Fungi	Mucoromycota	Mucoromycetes	Mucorales	Syncephalastraceae	Other <1%
ASV 597	0.000466431	UIC128	chow LM485	Fungi	Mucoromycota	Mucoromycetes	Mucorales	Rhizopodaceae	Other <1%
ASV 8	0.000438994	UIC128	chow LM485	Fungi	Ascomycota	Dothideomycetes	Pleosporales	Didymellaceae	Other <1%
ASV 157	0.000274371	UIC128	chow LM485	Fungi	Mucoromycota	Mucoromycetes	Mucorales	Lichtheimiaceae	Other <1%
ASV 113	9.60299e-05	UIC128	chow LM485	Fungi	Ascomycota	Dothideomycetes	Pleosporales	o__Pleosporales	Other <1%
ASV 1	1.37186e-05	UIC128	chow LM485	Fungi	Ascomycota	Saccharomycetes	Saccharomycetales	Saccharomycetales_fam_Incertae_sedis	Other <1%
ASV 110	1.37186e-05	UIC128	chow LM485	Fungi	Ascomycota	Dothideomycetes	Pleosporales	Phaeosphaeriaceae	Other <1%
ASV 446	1.37186e-05	UIC128	chow LM485	Fungi	Ascomycota	Sordariomycetes	Microascales	Microascaceae	Other <1%
ASV 45	1.37186e-05	UIC128	chow LM485	Fungi	Chytridiomycota	Rhizophydiomycetes	Rhizophydiales	Aquamycetaceae	Other <1%
ASV 471	1.37186e-05	UIC128	chow LM485	Fungi	Ascomycota	Eurotiomycetes	Chaetothyriales	Herpotrichiellaceae	Other <1%
ASV 50	1.37186e-05	UIC128	chow LM485	Fungi	Ascomycota	Saccharomycetes	Saccharomycetales	Saccharomycetaceae	Other <1%
ASV 91	1.37186e-05	UIC128	chow LM485	Fungi	Basidiomycota	Tremellomycetes	Trichosporonales	Trichosporonaceae	Other <1%
ASV 2	0.369939	UIC128	chow 2914	Fungi	Ascomycota	Eurotiomycetes	Eurotiales	Aspergillaceae	Aspergillus
ASV 18	0.100017	UIC128	chow 2914	Fungi	Basidiomycota	Tremellomycetes	Tremellales	Bulleribasidiaceae	Vishniacozyma
ASV 6	0.0959124	UIC128	chow 2914	Fungi	Ascomycota	Dothideomycetes	Pleosporales	Pleosporaceae	Alternaria
ASV 16	0.0453555	UIC128	chow 2914	Fungi	Ascomycota	Eurotiomycetes	Eurotiales	Aspergillaceae	Penicillium
ASV 100	0.0434162	UIC128	chow 2914	Fungi	Ascomycota	Dothideomycetes	Pleosporales	Didymellaceae	Didymella
ASV 12	0.0415671	UIC128	chow 2914	Fungi	Ascomycota	Sordariomycetes	Diaporthales	Diaporthaceae	Stenocarpella
ASV 9	0.0377185	UIC128	chow 2914	Fungi	Ascomycota	Dothideomycetes	Capnodiales	Mycosphaerellaceae	Mycosphaerella
ASV 31	0.0303372	UIC128	chow 2914	Fungi	Ascomycota	Dothideomycetes	Pleosporales	Didymellaceae	Epicoccum
ASV 52	0.0299914	UIC128	chow 2914	Fungi	Basidiomycota	Tremellomycetes	Tremellales	Tremellaceae	Cryptococcus
ASV 149	0.0225349	UIC128	chow 2914	Fungi	Basidiomycota	Tremellomycetes	Trichosporonales	Trichosporonaceae	Apiotrichum
ASV 53	0.0223846	UIC128	chow 2914	Fungi	Basidiomycota	Tremellomycetes	Filobasidiales	Filobasidiaceae	Filobasidium
ASV 17	0.0222944	UIC128	chow 2914	Fungi	Ascomycota	Sordariomycetes	Microascales	Microascaceae	Microascus
ASV 78	0.0179949	UIC128	chow 2914	Fungi	Mucoromycota	Mucoromycetes	Mucorales	Lichtheimiaceae	Lichtheimia
ASV 210	0.0151536	UIC128	chow 2914	Fungi	Basidiomycota	Tremellomycetes	Filobasidiales	Filobasidiaceae	Naganishia
ASV 3	0.0125528	UIC128	chow 2914	Fungi	Ascomycota	Dothideomycetes	Capnodiales	Cladosporiaceae	Cladosporium
ASV 25	0.011305	UIC128	chow 2914	Fungi	Basidiomycota	Wallemiomycetes	Wallemiales	Wallemiaceae	Wallemia
ASV 28	0.0110645	UIC128	chow 2914	Fungi	Ascomycota	Leotiomycetes	Helotiales	Myxotrichaceae	Oidiodendron
ASV 33	0.0110194	UIC128	chow 2914	Fungi	Basidiomycota	Microbotryomycetes	Sporidiobolales	Sporidiobolaceae	Sporobolomyces
ASV 10	0.0101174	UIC128	chow 2914	Fungi	Ascomycota	Sordariomycetes	Hypocreales	Clavicipitaceae	Claviceps
ASV 204	0.00947098	UIC128	chow 2914	Fungi	Ascomycota	Sordariomycetes	Hypocreales	Clavicipitaceae	Other <1%
ASV 27	0.00945594	UIC128	chow 2914	Fungi	Ascomycota	Dothideomycetes	Dothideales	Aureobasidiaceae	Other <1%
ASV 45	0.00942588	UIC128	chow 2914	Fungi	Chytridiomycota	Rhizophydiomycetes	Rhizophydiales	Aquamycetaceae	Other <1%
ASV 41	0.00935071	UIC128	chow 2914	Fungi	Ascomycota	Sordariomycetes	Hypocreales	Nectriaceae	Other <1%
ASV 464	0.00905005	UIC128	chow 2914	Fungi	Chytridiomycota	Rhizophydiomycetes	Rhizophydiales	o__Rhizophydiales	Other <1%
ASV 205	0.00246546	UIC128	chow 2914	Fungi	Mucoromycota	Mucoromycetes	Mucorales	Mucoraceae	Other <1%
ASV 1575	3.00666e-05	UIC128	chow 2914	Fungi	Basidiomycota	Agaricomycetes	Agaricales	Lyophyllaceae	Other <1%
ASV 94	3.00666e-05	UIC128	chow 2914	Fungi	Basidiomycota	Agaricomycetes	c__Agaricomycetes	c__Agaricomycetes	Other <1%
ASV 1483	1.50333e-05	UIC128	chow 2914	Fungi	Ascomycota	Eurotiomycetes	Onygenales	o__Onygenales	Other <1%
ASV 162	1.50333e-05	UIC128	chow 2914	Fungi	Ascomycota	Eurotiomycetes	Chaetothyriales	Chaetothyriales_fam_Incertae_sedis	Other <1%
ASV 77	1.50333e-05	UIC128	chow 2914	Fungi	Ascomycota	Dothideomycetes	Capnodiales	o__Capnodiales	Other <1%
ASV 2	0.230656	UIC129	chow LM485	Fungi	Ascomycota	Eurotiomycetes	Eurotiales	Aspergillaceae	Aspergillus
ASV 12	0.2183	UIC129	chow LM485	Fungi	Ascomycota	Sordariomycetes	Diaporthales	Diaporthaceae	Stenocarpella
ASV 16	0.0628808	UIC129	chow LM485	Fungi	Ascomycota	Eurotiomycetes	Eurotiales	Aspergillaceae	Penicillium
ASV 3	0.0623847	UIC129	chow LM485	Fungi	Ascomycota	Dothideomycetes	Capnodiales	Cladosporiaceae	Cladosporium
ASV 33	0.0520441	UIC129	chow LM485	Fungi	Basidiomycota	Microbotryomycetes	Sporidiobolales	Sporidiobolaceae	Sporobolomyces
ASV 18	0.0373936	UIC129	chow LM485	Fungi	Basidiomycota	Tremellomycetes	Tremellales	Bulleribasidiaceae	Vishniacozyma
ASV 17	0.0321225	UIC129	chow LM485	Fungi	Ascomycota	Sordariomycetes	Microascales	Microascaceae	Microascus
ASV 36	0.0267429	UIC129	chow LM485	Fungi	Ascomycota	Sordariomycetes	Hypocreales	Hypocreaceae	Trichoderma
ASV 234	0.0247585	UIC129	chow LM485	Fungi	Ascomycota	Eurotiomycetes	Eurotiales	Aspergillaceae	Xeromyces
ASV 79	0.0241849	UIC129	chow LM485	Fungi	Basidiomycota	Tremellomycetes	Tremellales	Rhynchogastremataceae	Papiliotrema
ASV 7	0.0225881	UIC129	chow LM485	Fungi	Ascomycota	Eurotiomycetes	Eurotiales	Trichocomaceae	Talaromyces
ASV 78	0.0215339	UIC129	chow LM485	Fungi	Mucoromycota	Mucoromycetes	Mucorales	Lichtheimiaceae	Lichtheimia
ASV 74	0.0153171	UIC129	chow LM485	Fungi	Basidiomycota	Ustilaginomycetes	Ustilaginales	Ustilaginaceae	Ustilago
ASV 8	0.0141079	UIC129	chow LM485	Fungi	Ascomycota	Dothideomycetes	Pleosporales	Didymellaceae	Ascochyta
ASV 9	0.0125731	UIC129	chow LM485	Fungi	Ascomycota	Dothideomycetes	Capnodiales	Mycosphaerellaceae	Mycosphaerella
ASV 53	0.0123715	UIC129	chow LM485	Fungi	Basidiomycota	Tremellomycetes	Filobasidiales	Filobasidiaceae	Filobasidium
ASV 412	0.0114723	UIC129	chow LM485	Fungi	Basidiomycota	Tremellomycetes	Tremellales	Cryptococcaceae	Kwoniella
ASV 25	0.0111468	UIC129	chow LM485	Fungi	Basidiomycota	Wallemiomycetes	Wallemiales	Wallemiaceae	Wallemia
ASV 120	0.00989101	UIC129	chow LM485	Fungi	Ascomycota	Sordariomycetes	Trichosphaeriales	Trichosphaeriaceae	Other <1%
ASV 210	0.00961196	UIC129	chow LM485	Fungi	Basidiomycota	Tremellomycetes	Filobasidiales	Filobasidiaceae	Other <1%
ASV 6	0.00958095	UIC129	chow LM485	Fungi	Ascomycota	Dothideomycetes	Pleosporales	Pleosporaceae	Other <1%
ASV 553	0.00603073	UIC129	chow LM485	Fungi	Basidiomycota	Tremellomycetes	Cystofilobasidiales	Mrakiaceae	Other <1%
ASV 418	0.00601522	UIC129	chow LM485	Fungi	Ascomycota	Dothideomycetes	Pleosporales	Pleosporaceae	Other <1%
ASV 10	0.00595321	UIC129	chow LM485	Fungi	Ascomycota	Sordariomycetes	Hypocreales	Clavicipitaceae	Other <1%
ASV 213	0.00564315	UIC129	chow LM485	Fungi	Ascomycota	Eurotiomycetes	Eurotiales	Trichocomaceae	Other <1%
ASV 41	0.00426337	UIC129	chow LM485	Fungi	Ascomycota	Sordariomycetes	Hypocreales	Nectriaceae	Other <1%
ASV 132	0.00375176	UIC129	chow LM485	Fungi	Basidiomycota	Tremellomycetes	Tremellales	Bulleribasidiaceae	Other <1%
ASV 551	0.00375176	UIC129	chow LM485	Fungi	Ascomycota	Sordariomycetes	Microascales	Microascales_fam_Incertae_sedis	Other <1%
ASV 295	0.00314714	UIC129	chow LM485	Fungi	Basidiomycota	Ustilaginomycetes	Ustilaginales	Ustilaginaceae	Other <1%
ASV 427	0.00306962	UIC129	chow LM485	Fungi	Basidiomycota	Cystobasidiomycetes	Cystobasidiales	Cystobasidiaceae	Other <1%
ASV 765	0.00305412	UIC129	chow LM485	Fungi	Ascomycota	Sordariomycetes	Microascales	Microascaceae	Other <1%
ASV 52	0.00299211	UIC129	chow LM485	Fungi	Basidiomycota	Tremellomycetes	Tremellales	Tremellaceae	Other <1%
ASV 122	0.00275956	UIC129	chow LM485	Fungi	Basidiomycota	Microbotryomycetes	Sporidiobolales	Sporidiobolaceae	Other <1%
ASV 598	0.00257352	UIC129	chow LM485	Fungi	Mucoromycota	Mucoromycetes	Mucorales	Mucoraceae	Other <1%
ASV 821	0.00255802	UIC129	chow LM485	Fungi	Ascomycota	Dothideomycetes	Pleosporales	Didymosphaeriaceae	Other <1%
ASV 113	0.002434	UIC129	chow LM485	Fungi	Ascomycota	Dothideomycetes	Pleosporales	o__Pleosporales	Other <1%
ASV 28	0.00240299	UIC129	chow LM485	Fungi	Ascomycota	Leotiomycetes	Helotiales	Myxotrichaceae	Other <1%
ASV 205	0.00213944	UIC129	chow LM485	Fungi	Mucoromycota	Mucoromycetes	Mucorales	Mucoraceae	Other <1%
ASV 897	0.00190689	UIC129	chow LM485	Fungi	Ascomycota	Sordariomycetes	Hypocreales	Bionectriaceae	Other <1%
ASV 310	0.00168984	UIC129	chow LM485	Fungi	Basidiomycota	Agaricomycetes	Agaricales	o__Agaricales	Other <1%
ASV 124	0.00161233	UIC129	chow LM485	Fungi	Ascomycota	Sordariomycetes	Hypocreales	Hypocreales_fam_Incertae_sedis	Other <1%
ASV 91	0.00161233	UIC129	chow LM485	Fungi	Basidiomycota	Tremellomycetes	Trichosporonales	Trichosporonaceae	Other <1%
ASV 396	0.0014573	UIC129	chow LM485	Fungi	Ascomycota	Dothideomycetes	Pleosporales	Phaeosphaeriaceae	Other <1%
ASV 62	0.00139528	UIC129	chow LM485	Fungi	Basidiomycota	Ustilaginomycetes	Ustilaginales	Ustilaginaceae	Other <1%
ASV 365	0.00128676	UIC129	chow LM485	Fungi	Ascomycota	Dothideomycetes	Pleosporales	Phaeosphaeriaceae	Other <1%
ASV 446	0.00128676	UIC129	chow LM485	Fungi	Ascomycota	Sordariomycetes	Microascales	Microascaceae	Other <1%
ASV 110	0.00114723	UIC129	chow LM485	Fungi	Ascomycota	Dothideomycetes	Pleosporales	Phaeosphaeriaceae	Other <1%
ASV 1001	0.00110072	UIC129	chow LM485	Fungi	Ascomycota	Saccharomycetes	Saccharomycetales	Trichomonascaceae	Other <1%
ASV 157	0.000666636	UIC129	chow LM485	Fungi	Mucoromycota	Mucoromycetes	Mucorales	Lichtheimiaceae	Other <1%
ASV 1172	0.000279057	UIC129	chow LM485	Fungi	Ascomycota	Dothideomycetes	Pleosporales	Thyridariaceae	Other <1%
ASV 597	0.000201541	UIC129	chow LM485	Fungi	Mucoromycota	Mucoromycetes	Mucorales	Rhizopodaceae	Other <1%
ASV 1009	3.10063e-05	UIC129	chow LM485	Fungi	Mucoromycota	Mucoromycetes	Mucorales	Syncephalastraceae	Other <1%
ASV 1895	3.10063e-05	UIC129	chow LM485	Fungi	Ascomycota	Eurotiomycetes	Eurotiales	o__Eurotiales	Other <1%
ASV 1234	1.55032e-05	UIC129	chow LM485	Fungi	Ascomycota	p__Ascomycota	p__Ascomycota	p__Ascomycota	Other <1%
ASV 1748	1.55032e-05	UIC129	chow LM485	Fungi	Ascomycota	Eurotiomycetes	Eurotiales	Aspergillaceae	Other <1%
ASV 369	1.55032e-05	UIC129	chow LM485	Fungi	Ascomycota	Dothideomycetes	Pleosporales	Didymellaceae	Other <1%
ASV 45	1.55032e-05	UIC129	chow LM485	Fungi	Chytridiomycota	Rhizophydiomycetes	Rhizophydiales	Aquamycetaceae	Other <1%
ASV 486	1.55032e-05	UIC129	chow LM485	Fungi	Ascomycota	Saccharomycetes	Saccharomycetales	Phaffomycetaceae	Other <1%
ASV 50	1.55032e-05	UIC129	chow LM485	Fungi	Ascomycota	Saccharomycetes	Saccharomycetales	Saccharomycetaceae	Other <1%
ASV 2	0.371015	UIC129	chow 2914	Fungi	Ascomycota	Eurotiomycetes	Eurotiales	Aspergillaceae	Aspergillus
ASV 25	0.0937879	UIC129	chow 2914	Fungi	Basidiomycota	Wallemiomycetes	Wallemiales	Wallemiaceae	Wallemia
ASV 52	0.0705433	UIC129	chow 2914	Fungi	Basidiomycota	Tremellomycetes	Tremellales	Tremellaceae	Cryptococcus
ASV 18	0.0633646	UIC129	chow 2914	Fungi	Basidiomycota	Tremellomycetes	Tremellales	Bulleribasidiaceae	Vishniacozyma
ASV 6	0.0551517	UIC129	chow 2914	Fungi	Ascomycota	Dothideomycetes	Pleosporales	Pleosporaceae	Alternaria
ASV 16	0.049157	UIC129	chow 2914	Fungi	Ascomycota	Eurotiomycetes	Eurotiales	Aspergillaceae	Penicillium
ASV 3	0.0281304	UIC129	chow 2914	Fungi	Ascomycota	Dothideomycetes	Capnodiales	Cladosporiaceae	Cladosporium
ASV 27	0.0279206	UIC129	chow 2914	Fungi	Ascomycota	Dothideomycetes	Dothideales	Aureobasidiaceae	Aureobasidium
ASV 36	0.0183889	UIC129	chow 2914	Fungi	Ascomycota	Sordariomycetes	Hypocreales	Hypocreaceae	Trichoderma
ASV 132	0.0183439	UIC129	chow 2914	Fungi	Basidiomycota	Tremellomycetes	Tremellales	Bulleribasidiaceae	Hannaella
ASV 79	0.0154365	UIC129	chow 2914	Fungi	Basidiomycota	Tremellomycetes	Tremellales	Rhynchogastremataceae	Papiliotrema
ASV 350	0.0147471	UIC129	chow 2914	Fungi	Ascomycota	Sordariomycetes	Hypocreales	Hypocreales_fam_Incertae_sedis	Trichothecium
ASV 78	0.0144773	UIC129	chow 2914	Fungi	Mucoromycota	Mucoromycetes	Mucorales	Lichtheimiaceae	Lichtheimia
ASV 7	0.0140727	UIC129	chow 2914	Fungi	Ascomycota	Eurotiomycetes	Eurotiales	Trichocomaceae	Talaromyces
ASV 12	0.0132034	UIC129	chow 2914	Fungi	Ascomycota	Sordariomycetes	Diaporthales	Diaporthaceae	Stenocarpella
ASV 41	0.0128138	UIC129	chow 2914	Fungi	Ascomycota	Sordariomycetes	Hypocreales	Nectriaceae	Fusarium
ASV 53	0.0127239	UIC129	chow 2914	Fungi	Basidiomycota	Tremellomycetes	Filobasidiales	Filobasidiaceae	Filobasidium
ASV 454	0.0124841	UIC129	chow 2914	Fungi	Ascomycota	Dothideomycetes	Capnodiales	Teratosphaeriaceae	f__Teratosphaeriaceae
ASV 430	0.0100412	UIC129	chow 2914	Fungi	Basidiomycota	Tremellomycetes	Cystofilobasidiales	Cystofilobasidiaceae	Cystofilobasidium
ASV 397	0.00867741	UIC129	chow 2914	Fungi	Basidiomycota	p__Basidiomycota	p__Basidiomycota	p__Basidiomycota	Other <1%
ASV 130	0.00863245	UIC129	chow 2914	Fungi	Ascomycota	Dothideomycetes	Pleosporales	Pleosporaceae	Other <1%
ASV 33	0.0078831	UIC129	chow 2914	Fungi	Basidiomycota	Microbotryomycetes	Sporidiobolales	Sporidiobolaceae	Other <1%
ASV 66	0.00777819	UIC129	chow 2914	Fungi	Ascomycota	Eurotiomycetes	Eurotiales	Trichocomaceae	Other <1%
ASV 228	0.00702885	UIC129	chow 2914	Fungi	Basidiomycota	Exobasidiomycetes	Entylomatales	Entylomatales_fam_Incertae_sedis	Other <1%
ASV 523	0.00690895	UIC129	chow 2914	Fungi	Ascomycota	Sordariomycetes	Microascales	Microascaceae	Other <1%
ASV 9	0.00687898	UIC129	chow 2914	Fungi	Ascomycota	Dothideomycetes	Capnodiales	Mycosphaerellaceae	Other <1%
ASV 45	0.00647433	UIC129	chow 2914	Fungi	Chytridiomycota	Rhizophydiomycetes	Rhizophydiales	Aquamycetaceae	Other <1%
ASV 493	0.0046909	UIC129	chow 2914	Fungi	Basidiomycota	Tremellomycetes	Cystofilobasidiales	Mrakiaceae	Other <1%
ASV 157	0.00460097	UIC129	chow 2914	Fungi	Mucoromycota	Mucoromycetes	Mucorales	Lichtheimiaceae	Other <1%
ASV 54	0.00395654	UIC129	chow 2914	Fungi	Basidiomycota	Tremellomycetes	Tremellales	Tremellaceae	Other <1%
ASV 314	0.00386662	UIC129	chow 2914	Fungi	Ascomycota	Sordariomycetes	Microascales	Microascaceae	Other <1%
ASV 205	0.00359685	UIC129	chow 2914	Fungi	Mucoromycota	Mucoromycetes	Mucorales	Mucoraceae	Other <1%
ASV 940	0.00152866	UIC129	chow 2914	Fungi	Basidiomycota	Tremellomycetes	Tremellales	Bulleribasidiaceae	Other <1%
ASV 1052	0.000719371	UIC129	chow 2914	Fungi	Ascomycota	Leotiomycetes	Helotiales	Myxotrichaceae	Other <1%
ASV 17	0.000599475	UIC129	chow 2914	Fungi	Ascomycota	Sordariomycetes	Microascales	Microascaceae	Other <1%
ASV 629	0.000104908	UIC129	chow 2914	Fungi	Mucoromycota	Mucoromycetes	Mucorales	Lichtheimiaceae	Other <1%
ASV 28	2.99738e-05	UIC129	chow 2914	Fungi	Ascomycota	Leotiomycetes	Helotiales	Myxotrichaceae	Other <1%
ASV 74	2.99738e-05	UIC129	chow 2914	Fungi	Basidiomycota	Ustilaginomycetes	Ustilaginales	Ustilaginaceae	Other <1%
ASV 77	2.99738e-05	UIC129	chow 2914	Fungi	Ascomycota	Dothideomycetes	Capnodiales	o__Capnodiales	Other <1%
ASV 8	2.99738e-05	UIC129	chow 2914	Fungi	Ascomycota	Dothideomycetes	Pleosporales	Didymellaceae	Other <1%
ASV 1	1.49869e-05	UIC129	chow 2914	Fungi	Ascomycota	Saccharomycetes	Saccharomycetales	Saccharomycetales_fam_Incertae_sedis	Other <1%
ASV 123	1.49869e-05	UIC129	chow 2914	Fungi	Ascomycota	Sordariomycetes	Xylariales	Xylariaceae	Other <1%
ASV 1483	1.49869e-05	UIC129	chow 2914	Fungi	Ascomycota	Eurotiomycetes	Onygenales	o__Onygenales	Other <1%
ASV 149	1.49869e-05	UIC129	chow 2914	Fungi	Basidiomycota	Tremellomycetes	Trichosporonales	Trichosporonaceae	Other <1%
ASV 219	1.49869e-05	UIC129	chow 2914	Fungi	Basidiomycota	Agaricomycetes	Polyporales	Meruliaceae	Other <1%
ASV 31	1.49869e-05	UIC129	chow 2914	Fungi	Ascomycota	Dothideomycetes	Pleosporales	Didymellaceae	Other <1%
ASV 361	1.49869e-05	UIC129	chow 2914	Fungi	Basidiomycota	Agaricomycetes	Agaricales	Psathyrellaceae	Other <1%
ASV 442	1.49869e-05	UIC129	chow 2914	Fungi	Basidiomycota	Ustilaginomycetes	Ustilaginales	Ustilaginaceae	Other <1%
ASV 452	1.49869e-05	UIC129	chow 2914	Fungi	Basidiomycota	Malasseziomycetes	Malasseziales	Malasseziaceae	Other <1%
ASV 94	1.49869e-05	UIC129	chow 2914	Fungi	Basidiomycota	Agaricomycetes	c__Agaricomycetes	c__Agaricomycetes	Other <1%
ASV 2	0.340591	UIC130	chow LM485	Fungi	Ascomycota	Eurotiomycetes	Eurotiales	Aspergillaceae	Aspergillus
ASV 3	0.0888473	UIC130	chow LM485	Fungi	Ascomycota	Dothideomycetes	Capnodiales	Cladosporiaceae	Cladosporium
ASV 78	0.0654732	UIC130	chow LM485	Fungi	Mucoromycota	Mucoromycetes	Mucorales	Lichtheimiaceae	Lichtheimia
ASV 7	0.0638431	UIC130	chow LM485	Fungi	Ascomycota	Eurotiomycetes	Eurotiales	Trichocomaceae	Talaromyces
ASV 18	0.0634178	UIC130	chow LM485	Fungi	Basidiomycota	Tremellomycetes	Tremellales	Bulleribasidiaceae	Vishniacozyma
ASV 17	0.0541192	UIC130	chow LM485	Fungi	Ascomycota	Sordariomycetes	Microascales	Microascaceae	Microascus
ASV 16	0.045586	UIC130	chow LM485	Fungi	Ascomycota	Eurotiomycetes	Eurotiales	Aspergillaceae	Penicillium
ASV 33	0.0280235	UIC130	chow LM485	Fungi	Basidiomycota	Microbotryomycetes	Sporidiobolales	Sporidiobolaceae	Sporobolomyces
ASV 110	0.0271021	UIC130	chow LM485	Fungi	Ascomycota	Dothideomycetes	Pleosporales	Phaeosphaeriaceae	f__Phaeosphaeriaceae
ASV 9	0.0234592	UIC130	chow LM485	Fungi	Ascomycota	Dothideomycetes	Capnodiales	Mycosphaerellaceae	Mycosphaerella
ASV 8	0.023445	UIC130	chow LM485	Fungi	Ascomycota	Dothideomycetes	Pleosporales	Didymellaceae	Ascochyta
ASV 205	0.0226938	UIC130	chow LM485	Fungi	Mucoromycota	Mucoromycetes	Mucorales	Mucoraceae	Mucor
ASV 6	0.0217299	UIC130	chow LM485	Fungi	Ascomycota	Dothideomycetes	Pleosporales	Pleosporaceae	Alternaria
ASV 41	0.0172223	UIC130	chow LM485	Fungi	Ascomycota	Sordariomycetes	Hypocreales	Nectriaceae	Fusarium
ASV 53	0.0122328	UIC130	chow LM485	Fungi	Basidiomycota	Tremellomycetes	Filobasidiales	Filobasidiaceae	Filobasidium
ASV 119	0.010461	UIC130	chow LM485	Fungi	Ascomycota	Sordariomycetes	Glomerellales	Plectosphaerellaceae	Verticillium
ASV 25	0.00816465	UIC130	chow LM485	Fungi	Basidiomycota	Wallemiomycetes	Wallemiales	Wallemiaceae	Other <1%
ASV 31	0.00652038	UIC130	chow LM485	Fungi	Ascomycota	Dothideomycetes	Pleosporales	Didymellaceae	Other <1%
ASV 210	0.00643533	UIC130	chow LM485	Fungi	Basidiomycota	Tremellomycetes	Filobasidiales	Filobasidiaceae	Other <1%
ASV 132	0.00595339	UIC130	chow LM485	Fungi	Basidiomycota	Tremellomycetes	Tremellales	Bulleribasidiaceae	Other <1%
ASV 113	0.00545728	UIC130	chow LM485	Fungi	Ascomycota	Dothideomycetes	Pleosporales	o__Pleosporales	Other <1%
ASV 549	0.00500369	UIC130	chow LM485	Fungi	Basidiomycota	Tremellomycetes	Cystofilobasidiales	Cystofilobasidiales_fam_Incertae_sedis	Other <1%
ASV 592	0.00490446	UIC130	chow LM485	Fungi	Basidiomycota	Exobasidiomycetes	Entylomatales	o__Entylomatales	Other <1%
ASV 651	0.00402563	UIC130	chow LM485	Fungi	Ascomycota	Pezizomycetes	Pezizales	Ascodesmidaceae	Other <1%
ASV 396	0.00395475	UIC130	chow LM485	Fungi	Ascomycota	Dothideomycetes	Pleosporales	Phaeosphaeriaceae	Other <1%
ASV 157	0.00337359	UIC130	chow LM485	Fungi	Mucoromycota	Mucoromycetes	Mucorales	Lichtheimiaceae	Other <1%
ASV 12	0.00331689	UIC130	chow LM485	Fungi	Ascomycota	Sordariomycetes	Diaporthales	Diaporthaceae	Other <1%
ASV 729	0.00313262	UIC130	chow LM485	Fungi	Ascomycota	Dothideomycetes	Pleosporales	Lophiostomataceae	Other <1%
ASV 523	0.00284912	UIC130	chow LM485	Fungi	Ascomycota	Sordariomycetes	Microascales	Microascaceae	Other <1%
ASV 382	0.00279243	UIC130	chow LM485	Fungi	Ascomycota	Dothideomycetes	Pleosporales	Didymellaceae	Other <1%
ASV 36	0.00276408	UIC130	chow LM485	Fungi	Ascomycota	Sordariomycetes	Hypocreales	Hypocreaceae	Other <1%
ASV 506	0.00250893	UIC130	chow LM485	Fungi	Ascomycota	Sordariomycetes	Hypocreales	Nectriaceae	Other <1%
ASV 295	0.00222544	UIC130	chow LM485	Fungi	Basidiomycota	Ustilaginomycetes	Ustilaginales	Ustilaginaceae	Other <1%
ASV 841	0.00221126	UIC130	chow LM485	Fungi	Mortierellomycota	Mortierellomycetes	Mortierellales	Mortierellaceae	Other <1%
ASV 94	0.00216874	UIC130	chow LM485	Fungi	Basidiomycota	Agaricomycetes	c__Agaricomycetes	c__Agaricomycetes	Other <1%
ASV 45	0.00215456	UIC130	chow LM485	Fungi	Chytridiomycota	Rhizophydiomycetes	Rhizophydiales	Aquamycetaceae	Other <1%
ASV 853	0.00204116	UIC130	chow LM485	Fungi	Basidiomycota	Ustilaginomycetes	Ustilaginales	Ustilaginaceae	Other <1%
ASV 884	0.00181437	UIC130	chow LM485	Fungi	Basidiomycota	Tremellomycetes	Cystofilobasidiales	Mrakiaceae	Other <1%
ASV 369	0.00180019	UIC130	chow LM485	Fungi	Ascomycota	Dothideomycetes	Pleosporales	Didymellaceae	Other <1%
ASV 314	0.00178602	UIC130	chow LM485	Fungi	Ascomycota	Sordariomycetes	Microascales	Microascaceae	Other <1%
ASV 400	0.0013466	UIC130	chow LM485	Fungi	Basidiomycota	Agaricomycetes	Geastrales	Sphaerobolaceae	Other <1%
ASV 597	0.00104893	UIC130	chow LM485	Fungi	Mucoromycota	Mucoromycetes	Mucorales	Rhizopodaceae	Other <1%
ASV 122	0.000822135	UIC130	chow LM485	Fungi	Basidiomycota	Microbotryomycetes	Sporidiobolales	Sporidiobolaceae	Other <1%
ASV 1087	0.000510291	UIC130	chow LM485	Fungi	Basidiomycota	Agaricomycetes	Agaricales	Hygrophoraceae	Other <1%
ASV 1009	0.000340194	UIC130	chow LM485	Fungi	Mucoromycota	Mucoromycetes	Mucorales	Syncephalastraceae	Other <1%
ASV 598	0.000155922	UIC130	chow LM485	Fungi	Mucoromycota	Mucoromycetes	Mucorales	Mucoraceae	Other <1%
ASV 518	5.6699e-05	UIC130	chow LM485	Fungi	Ascomycota	Sordariomycetes	Glomerellales	Glomerellaceae	Other <1%
ASV 79	4.25242e-05	UIC130	chow LM485	Fungi	Basidiomycota	Tremellomycetes	Tremellales	Rhynchogastremataceae	Other <1%
ASV 1792	1.41747e-05	UIC130	chow LM485	Fungi	Ascomycota	Dothideomycetes	Pleosporales	Phaeosphaeriaceae	Other <1%
ASV 1895	1.41747e-05	UIC130	chow LM485	Fungi	Ascomycota	Eurotiomycetes	Eurotiales	o__Eurotiales	Other <1%
ASV 260	1.41747e-05	UIC130	chow LM485	Fungi	Ascomycota	Eurotiomycetes	Onygenales	Onygenales_fam_Incertae_sedis	Other <1%
ASV 38	1.41747e-05	UIC130	chow LM485	Fungi	Ascomycota	Dothideomycetes	Capnodiales	Teratosphaeriaceae	Other <1%
ASV 452	1.41747e-05	UIC130	chow LM485	Fungi	Basidiomycota	Malasseziomycetes	Malasseziales	Malasseziaceae	Other <1%
ASV 2	0.341534	UIC130	chow 2914	Fungi	Ascomycota	Eurotiomycetes	Eurotiales	Aspergillaceae	Aspergillus
ASV 18	0.153324	UIC130	chow 2914	Fungi	Basidiomycota	Tremellomycetes	Tremellales	Bulleribasidiaceae	Vishniacozyma
ASV 91	0.111793	UIC130	chow 2914	Fungi	Basidiomycota	Tremellomycetes	Trichosporonales	Trichosporonaceae	Trichosporon
ASV 16	0.0548925	UIC130	chow 2914	Fungi	Ascomycota	Eurotiomycetes	Eurotiales	Aspergillaceae	Penicillium
ASV 33	0.0539354	UIC130	chow 2914	Fungi	Basidiomycota	Microbotryomycetes	Sporidiobolales	Sporidiobolaceae	Sporobolomyces
ASV 6	0.0344368	UIC130	chow 2914	Fungi	Ascomycota	Dothideomycetes	Pleosporales	Pleosporaceae	Alternaria
ASV 3	0.0265361	UIC130	chow 2914	Fungi	Ascomycota	Dothideomycetes	Capnodiales	Cladosporiaceae	Cladosporium
ASV 31	0.0250347	UIC130	chow 2914	Fungi	Ascomycota	Dothideomycetes	Pleosporales	Didymellaceae	Epicoccum
ASV 52	0.0243404	UIC130	chow 2914	Fungi	Basidiomycota	Tremellomycetes	Tremellales	Tremellaceae	Cryptococcus
ASV 12	0.024209	UIC130	chow 2914	Fungi	Ascomycota	Sordariomycetes	Diaporthales	Diaporthaceae	Stenocarpella
ASV 149	0.0181474	UIC130	chow 2914	Fungi	Basidiomycota	Tremellomycetes	Trichosporonales	Trichosporonaceae	Apiotrichum
ASV 132	0.0163833	UIC130	chow 2914	Fungi	Basidiomycota	Tremellomycetes	Tremellales	Bulleribasidiaceae	Hannaella
ASV 471	0.011016	UIC130	chow 2914	Fungi	Ascomycota	Eurotiomycetes	Chaetothyriales	Herpotrichiellaceae	Exophiala
ASV 7	0.0106782	UIC130	chow 2914	Fungi	Ascomycota	Eurotiomycetes	Eurotiales	Trichocomaceae	Talaromyces
ASV 25	0.010378	UIC130	chow 2914	Fungi	Basidiomycota	Wallemiomycetes	Wallemiales	Wallemiaceae	Wallemia
ASV 28	0.0100965	UIC130	chow 2914	Fungi	Ascomycota	Leotiomycetes	Helotiales	Myxotrichaceae	Oidiodendron
ASV 369	0.00989003	UIC130	chow 2914	Fungi	Ascomycota	Dothideomycetes	Pleosporales	Didymellaceae	Other <1%
ASV 157	0.00958976	UIC130	chow 2914	Fungi	Mucoromycota	Mucoromycetes	Mucorales	Lichtheimiaceae	Other <1%
ASV 563	0.00928949	UIC130	chow 2914	Fungi	Ascomycota	Saccharomycetes	Saccharomycetales	Dipodascaceae	Other <1%
ASV 9	0.00684983	UIC130	chow 2914	Fungi	Ascomycota	Dothideomycetes	Capnodiales	Mycosphaerellaceae	Other <1%
ASV 78	0.00666216	UIC130	chow 2914	Fungi	Mucoromycota	Mucoromycetes	Mucorales	Lichtheimiaceae	Other <1%
ASV 610	0.00609916	UIC130	chow 2914	Fungi	Rozellomycota	p__Rozellomycota	p__Rozellomycota	p__Rozellomycota	Other <1%
ASV 53	0.00504823	UIC130	chow 2914	Fungi	Basidiomycota	Tremellomycetes	Filobasidiales	Filobasidiaceae	Other <1%
ASV 41	0.00471043	UIC130	chow 2914	Fungi	Ascomycota	Sordariomycetes	Hypocreales	Nectriaceae	Other <1%
ASV 752	0.0038847	UIC130	chow 2914	Fungi	Ascomycota	Saccharomycetes	Saccharomycetales	o__Saccharomycetales	Other <1%
ASV 446	0.0033217	UIC130	chow 2914	Fungi	Ascomycota	Sordariomycetes	Microascales	Microascaceae	Other <1%
ASV 344	0.00322786	UIC130	chow 2914	Fungi	Chytridiomycota	Rhizophydiomycetes	Rhizophydiales	Alphamycetaceae	Other <1%
ASV 205	0.00251473	UIC130	chow 2914	Fungi	Mucoromycota	Mucoromycetes	Mucorales	Mucoraceae	Other <1%
ASV 597	0.00193297	UIC130	chow 2914	Fungi	Mucoromycota	Mucoromycetes	Mucorales	Rhizopodaceae	Other <1%
ASV 364	5.63e-05	UIC130	chow 2914	Fungi	Basidiomycota	Ustilaginomycetes	Ustilaginales	Ustilaginaceae	Other <1%
ASV 238	3.75333e-05	UIC130	chow 2914	Fungi	Basidiomycota	Agaricomycetes	Agaricales	Schizophyllaceae	Other <1%
ASV 506	3.75333e-05	UIC130	chow 2914	Fungi	Ascomycota	Sordariomycetes	Hypocreales	Nectriaceae	Other <1%
ASV 1	1.87667e-05	UIC130	chow 2914	Fungi	Ascomycota	Saccharomycetes	Saccharomycetales	Saccharomycetales_fam_Incertae_sedis	Other <1%
ASV 100	1.87667e-05	UIC130	chow 2914	Fungi	Ascomycota	Dothideomycetes	Pleosporales	Didymellaceae	Other <1%
ASV 1895	1.87667e-05	UIC130	chow 2914	Fungi	Ascomycota	Eurotiomycetes	Eurotiales	o__Eurotiales	Other <1%
ASV 464	1.87667e-05	UIC130	chow 2914	Fungi	Chytridiomycota	Rhizophydiomycetes	Rhizophydiales	o__Rhizophydiales	Other <1%
ASV 50	1.87667e-05	UIC130	chow 2914	Fungi	Ascomycota	Saccharomycetes	Saccharomycetales	Saccharomycetaceae	Other <1%
ASV 54	1.87667e-05	UIC130	chow 2914	Fungi	Basidiomycota	Tremellomycetes	Tremellales	Tremellaceae	Other <1%
ASV 2	0.33597	UIC131	chow LM485	Fungi	Ascomycota	Eurotiomycetes	Eurotiales	Aspergillaceae	Aspergillus
ASV 3	0.0957129	UIC131	chow LM485	Fungi	Ascomycota	Dothideomycetes	Capnodiales	Cladosporiaceae	Cladosporium
ASV 78	0.0927563	UIC131	chow LM485	Fungi	Mucoromycota	Mucoromycetes	Mucorales	Lichtheimiaceae	Lichtheimia
ASV 36	0.0476677	UIC131	chow LM485	Fungi	Ascomycota	Sordariomycetes	Hypocreales	Hypocreaceae	Trichoderma
ASV 8	0.0444437	UIC131	chow LM485	Fungi	Ascomycota	Dothideomycetes	Pleosporales	Didymellaceae	Ascochyta
ASV 9	0.0391753	UIC131	chow LM485	Fungi	Ascomycota	Dothideomycetes	Capnodiales	Mycosphaerellaceae	Mycosphaerella
ASV 91	0.0366905	UIC131	chow LM485	Fungi	Basidiomycota	Tremellomycetes	Trichosporonales	Trichosporonaceae	Trichosporon
ASV 16	0.0344887	UIC131	chow LM485	Fungi	Ascomycota	Eurotiomycetes	Eurotiales	Aspergillaceae	Penicillium
ASV 17	0.0306042	UIC131	chow LM485	Fungi	Ascomycota	Sordariomycetes	Microascales	Microascaceae	Microascus
ASV 220	0.0269713	UIC131	chow LM485	Fungi	Basidiomycota	Tremellomycetes	Holtermanniales	Holtermanniales_fam_Incertae_sedis	Holtermanniella
ASV 25	0.0266096	UIC131	chow LM485	Fungi	Basidiomycota	Wallemiomycetes	Wallemiales	Wallemiaceae	Wallemia
ASV 18	0.0211996	UIC131	chow LM485	Fungi	Basidiomycota	Tremellomycetes	Tremellales	Bulleribasidiaceae	Vishniacozyma
ASV 205	0.0192967	UIC131	chow LM485	Fungi	Mucoromycota	Mucoromycetes	Mucorales	Mucoraceae	Mucor
ASV 79	0.0168905	UIC131	chow LM485	Fungi	Basidiomycota	Tremellomycetes	Tremellales	Rhynchogastremataceae	Papiliotrema
ASV 365	0.0137609	UIC131	chow LM485	Fungi	Ascomycota	Dothideomycetes	Pleosporales	Phaeosphaeriaceae	Neosetophoma
ASV 53	0.0136823	UIC131	chow LM485	Fungi	Basidiomycota	Tremellomycetes	Filobasidiales	Filobasidiaceae	Filobasidium
ASV 41	0.0120152	UIC131	chow LM485	Fungi	Ascomycota	Sordariomycetes	Hypocreales	Nectriaceae	Fusarium
ASV 40	0.0111188	UIC131	chow LM485	Fungi	Ascomycota	Dothideomycetes	Capnodiales	Mycosphaerellaceae	Ramularia
ASV 285	0.00951467	UIC131	chow LM485	Fungi	Basidiomycota	Tremellomycetes	Tremellales	Trimorphomycetaceae	Other <1%
ASV 74	0.00924732	UIC131	chow LM485	Fungi	Basidiomycota	Ustilaginomycetes	Ustilaginales	Ustilaginaceae	Other <1%
ASV 452	0.00901142	UIC131	chow LM485	Fungi	Basidiomycota	Malasseziomycetes	Malasseziales	Malasseziaceae	Other <1%
ASV 120	0.00731293	UIC131	chow LM485	Fungi	Ascomycota	Sordariomycetes	Trichosphaeriales	Trichosphaeriaceae	Other <1%
ASV 7	0.00671531	UIC131	chow LM485	Fungi	Ascomycota	Eurotiomycetes	Eurotiales	Trichocomaceae	Other <1%
ASV 132	0.00613343	UIC131	chow LM485	Fungi	Basidiomycota	Tremellomycetes	Tremellales	Bulleribasidiaceae	Other <1%
ASV 33	0.0059447	UIC131	chow LM485	Fungi	Basidiomycota	Microbotryomycetes	Sporidiobolales	Sporidiobolaceae	Other <1%
ASV 6	0.00580316	UIC131	chow LM485	Fungi	Ascomycota	Dothideomycetes	Pleosporales	Pleosporaceae	Other <1%
ASV 493	0.00541	UIC131	chow LM485	Fungi	Basidiomycota	Tremellomycetes	Cystofilobasidiales	Mrakiaceae	Other <1%
ASV 27	0.00514264	UIC131	chow LM485	Fungi	Ascomycota	Dothideomycetes	Dothideales	Aureobasidiaceae	Other <1%
ASV 643	0.00465511	UIC131	chow LM485	Fungi	Ascomycota	Sordariomycetes	Microascales	Microascaceae	Other <1%
ASV 157	0.00264209	UIC131	chow LM485	Fungi	Mucoromycota	Mucoromycetes	Mucorales	Lichtheimiaceae	Other <1%
ASV 843	0.00242192	UIC131	chow LM485	Fungi	Ascomycota	Leotiomycetes	Helotiales	Helotiaceae	Other <1%
ASV 598	0.000456075	UIC131	chow LM485	Fungi	Mucoromycota	Mucoromycetes	Mucorales	Mucoraceae	Other <1%
ASV 600	0.000283081	UIC131	chow LM485	Fungi	Ascomycota	Saccharomycetes	Saccharomycetales	Debaryomycetaceae	Other <1%
ASV 12	7.86337e-05	UIC131	chow LM485	Fungi	Ascomycota	Sordariomycetes	Diaporthales	Diaporthaceae	Other <1%
ASV 50	4.71802e-05	UIC131	chow LM485	Fungi	Ascomycota	Saccharomycetes	Saccharomycetales	Saccharomycetaceae	Other <1%
ASV 1	3.14535e-05	UIC131	chow LM485	Fungi	Ascomycota	Saccharomycetes	Saccharomycetales	Saccharomycetales_fam_Incertae_sedis	Other <1%
ASV 553	3.14535e-05	UIC131	chow LM485	Fungi	Basidiomycota	Tremellomycetes	Cystofilobasidiales	Mrakiaceae	Other <1%
ASV 597	3.14535e-05	UIC131	chow LM485	Fungi	Mucoromycota	Mucoromycetes	Mucorales	Rhizopodaceae	Other <1%
ASV 154	1.57267e-05	UIC131	chow LM485	Fungi	Ascomycota	Sordariomycetes	Hypocreales	Hypocreales_fam_Incertae_sedis	Other <1%
ASV 450	1.57267e-05	UIC131	chow LM485	Fungi	Ascomycota	Sordariomycetes	Hypocreales	Hypocreales_fam_Incertae_sedis	Other <1%
ASV 2	0.335176	UIC131	chow 2914	Fungi	Ascomycota	Eurotiomycetes	Eurotiales	Aspergillaceae	Aspergillus
ASV 18	0.103946	UIC131	chow 2914	Fungi	Basidiomycota	Tremellomycetes	Tremellales	Bulleribasidiaceae	Vishniacozyma
ASV 28	0.0872856	UIC131	chow 2914	Fungi	Ascomycota	Leotiomycetes	Helotiales	Myxotrichaceae	Oidiodendron
ASV 6	0.0755379	UIC131	chow 2914	Fungi	Ascomycota	Dothideomycetes	Pleosporales	Pleosporaceae	Alternaria
ASV 12	0.0684853	UIC131	chow 2914	Fungi	Ascomycota	Sordariomycetes	Diaporthales	Diaporthaceae	Stenocarpella
ASV 52	0.0622846	UIC131	chow 2914	Fungi	Basidiomycota	Tremellomycetes	Tremellales	Tremellaceae	Cryptococcus
ASV 9	0.0512302	UIC131	chow 2914	Fungi	Ascomycota	Dothideomycetes	Capnodiales	Mycosphaerellaceae	Mycosphaerella
ASV 31	0.035461	UIC131	chow 2914	Fungi	Ascomycota	Dothideomycetes	Pleosporales	Didymellaceae	Epicoccum
ASV 3	0.0202861	UIC131	chow 2914	Fungi	Ascomycota	Dothideomycetes	Capnodiales	Cladosporiaceae	Cladosporium
ASV 41	0.0198502	UIC131	chow 2914	Fungi	Ascomycota	Sordariomycetes	Hypocreales	Nectriaceae	Fusarium
ASV 369	0.0178097	UIC131	chow 2914	Fungi	Ascomycota	Dothideomycetes	Pleosporales	Didymellaceae	Neoascochyta
ASV 113	0.01674	UIC131	chow 2914	Fungi	Ascomycota	Dothideomycetes	Pleosporales	o__Pleosporales	o__Pleosporales
ASV 33	0.0157692	UIC131	chow 2914	Fungi	Basidiomycota	Microbotryomycetes	Sporidiobolales	Sporidiobolaceae	Sporobolomyces
ASV 122	0.0147985	UIC131	chow 2914	Fungi	Basidiomycota	Microbotryomycetes	Sporidiobolales	Sporidiobolaceae	Rhodotorula
ASV 94	0.0147193	UIC131	chow 2914	Fungi	Basidiomycota	Agaricomycetes	c__Agaricomycetes	c__Agaricomycetes	c__Agaricomycetes
ASV 53	0.0127977	UIC131	chow 2914	Fungi	Basidiomycota	Tremellomycetes	Filobasidiales	Filobasidiaceae	Filobasidium
ASV 27	0.0117873	UIC131	chow 2914	Fungi	Ascomycota	Dothideomycetes	Dothideales	Aureobasidiaceae	Aureobasidium
ASV 273	0.0117675	UIC131	chow 2914	Fungi	Basidiomycota	Tremellomycetes	Trichosporonales	Trichosporonaceae	Cutaneotrichosporon
ASV 16	0.00772614	UIC131	chow 2914	Fungi	Ascomycota	Eurotiomycetes	Eurotiales	Aspergillaceae	Other <1%
ASV 54	0.00596299	UIC131	chow 2914	Fungi	Basidiomycota	Tremellomycetes	Tremellales	Tremellaceae	Other <1%
ASV 205	0.00538849	UIC131	chow 2914	Fungi	Mucoromycota	Mucoromycetes	Mucorales	Mucoraceae	Other <1%
ASV 471	0.00475455	UIC131	chow 2914	Fungi	Ascomycota	Eurotiomycetes	Chaetothyriales	Herpotrichiellaceae	Other <1%
ASV 1	7.92424e-05	UIC131	chow 2914	Fungi	Ascomycota	Saccharomycetes	Saccharomycetales	Saccharomycetales_fam_Incertae_sedis	Other <1%
ASV 100	3.96212e-05	UIC131	chow 2914	Fungi	Ascomycota	Dothideomycetes	Pleosporales	Didymellaceae	Other <1%
ASV 8	3.96212e-05	UIC131	chow 2914	Fungi	Ascomycota	Dothideomycetes	Pleosporales	Didymellaceae	Other <1%
ASV 123	1.98106e-05	UIC131	chow 2914	Fungi	Ascomycota	Sordariomycetes	Xylariales	Xylariaceae	Other <1%
ASV 162	1.98106e-05	UIC131	chow 2914	Fungi	Ascomycota	Eurotiomycetes	Chaetothyriales	Chaetothyriales_fam_Incertae_sedis	Other <1%
ASV 17	1.98106e-05	UIC131	chow 2914	Fungi	Ascomycota	Sordariomycetes	Microascales	Microascaceae	Other <1%
ASV 25	1.98106e-05	UIC131	chow 2914	Fungi	Basidiomycota	Wallemiomycetes	Wallemiales	Wallemiaceae	Other <1%
ASV 317	1.98106e-05	UIC131	chow 2914	Fungi	Ascomycota	Sordariomycetes	Microascales	Microascaceae	Other <1%
ASV 344	1.98106e-05	UIC131	chow 2914	Fungi	Chytridiomycota	Rhizophydiomycetes	Rhizophydiales	Alphamycetaceae	Other <1%
ASV 45	1.98106e-05	UIC131	chow 2914	Fungi	Chytridiomycota	Rhizophydiomycetes	Rhizophydiales	Aquamycetaceae	Other <1%
ASV 450	1.98106e-05	UIC131	chow 2914	Fungi	Ascomycota	Sordariomycetes	Hypocreales	Hypocreales_fam_Incertae_sedis	Other <1%
ASV 452	1.98106e-05	UIC131	chow 2914	Fungi	Basidiomycota	Malasseziomycetes	Malasseziales	Malasseziaceae	Other <1%
ASV 506	1.98106e-05	UIC131	chow 2914	Fungi	Ascomycota	Sordariomycetes	Hypocreales	Nectriaceae	Other <1%
ASV 7	1.98106e-05	UIC131	chow 2914	Fungi	Ascomycota	Eurotiomycetes	Eurotiales	Trichocomaceae	Other <1%
ASV 74	1.98106e-05	UIC131	chow 2914	Fungi	Basidiomycota	Ustilaginomycetes	Ustilaginales	Ustilaginaceae	Other <1%
ASV 78	1.98106e-05	UIC131	chow 2914	Fungi	Mucoromycota	Mucoromycetes	Mucorales	Lichtheimiaceae	Other <1%
ASV 84	1.98106e-05	UIC131	chow 2914	Fungi	Basidiomycota	Cystobasidiomycetes	Cystobasidiomycetes_ord_Incertae_sedis	Symmetrosporaceae	Other <1%
