# Supplementary material for: Fungal xenosiderophores from mycobiota and diet promote Salmonella colonization of the inflamed gut
Source: Research Square preprint supplement (doi:10.21203/rs.3.rs-1175303/v1), 2022-01-05
Supplement: Supplementary file 2 [file 46df3c12947da32437dfdaba.xlsx]

## Sheet: Sheet1
Relative abundance ITS mice fed chow LM485 to purified 50ppm iron (related to figure 2D)
OTU	Abundance	Mouse	Diet	Kingdom	Phylum	Class	Order	Family	Genus
ASV 2	0.499247	UIC107	purified 50ppm iron	Fungi	Ascomycota	Eurotiomycetes	Eurotiales	Aspergillaceae	Aspergillus
ASV 45	0.257659	UIC107	purified 50ppm iron	Fungi	Chytridiomycota	Rhizophydiomycetes	Rhizophydiales	Aquamycetaceae	Aquamyces
ASV 46	0.236732	UIC107	purified 50ppm iron	Fungi	Ascomycota	Sordariomycetes	Hypocreales	Nectriaceae	Fusicolla
ASV 169	0.00066968	UIC107	purified 50ppm iron	Fungi	Basidiomycota	Tremellomycetes	Tremellales	Bulleribasidiaceae	Other <1%
ASV 44	0.00066968	UIC107	purified 50ppm iron	Fungi	Ascomycota	Saccharomycetes	Saccharomycetales	Saccharomycetaceae	Other <1%
ASV 3	0.00050226	UIC107	purified 50ppm iron	Fungi	Ascomycota	Dothideomycetes	Capnodiales	Cladosporiaceae	Other <1%
ASV 6	0.00050226	UIC107	purified 50ppm iron	Fungi	Ascomycota	Dothideomycetes	Pleosporales	Pleosporaceae	Other <1%
ASV 17	0.00033484	UIC107	purified 50ppm iron	Fungi	Ascomycota	Sordariomycetes	Microascales	Microascaceae	Other <1%
ASV 27	0.00033484	UIC107	purified 50ppm iron	Fungi	Ascomycota	Dothideomycetes	Dothideales	Aureobasidiaceae	Other <1%
ASV 483	0.00033484	UIC107	purified 50ppm iron	Fungi	Ascomycota	Saccharomycetes	Saccharomycetales	Saccharomycetales_fam_Incertae_sedis	Other <1%
ASV 840	0.00033484	UIC107	purified 50ppm iron	Fungi	Basidiomycota	Tremellomycetes	Tremellales	Rhynchogastremataceae	Other <1%
ASV 9	0.00033484	UIC107	purified 50ppm iron	Fungi	Ascomycota	Dothideomycetes	Capnodiales	Mycosphaerellaceae	Other <1%
ASV 1014	0.00016742	UIC107	purified 50ppm iron	Fungi	Basidiomycota	Tremellomycetes	Tremellales	Cryptococcaceae	Other <1%
ASV 12	0.00016742	UIC107	purified 50ppm iron	Fungi	Ascomycota	Sordariomycetes	Diaporthales	Diaporthaceae	Other <1%
ASV 14	0.00016742	UIC107	purified 50ppm iron	Fungi	Ascomycota	Eurotiomycetes	Eurotiales	Aspergillaceae	Other <1%
ASV 220	0.00016742	UIC107	purified 50ppm iron	Fungi	Basidiomycota	Tremellomycetes	Holtermanniales	Holtermanniales_fam_Incertae_sedis	Other <1%
ASV 260	0.00016742	UIC107	purified 50ppm iron	Fungi	Ascomycota	Eurotiomycetes	Onygenales	Onygenales_fam_Incertae_sedis	Other <1%
ASV 280	0.00016742	UIC107	purified 50ppm iron	Fungi	Basidiomycota	Agaricomycetes	Polyporales	Polyporaceae	Other <1%
ASV 301	0.00016742	UIC107	purified 50ppm iron	Fungi	Basidiomycota	Cystobasidiomycetes	Erythrobasidiales	Erythrobasidiaceae	Other <1%
ASV 307	0.00016742	UIC107	purified 50ppm iron	Fungi	Basidiomycota	Agaricomycetes	Russulales	Stereaceae	Other <1%
ASV 31	0.00016742	UIC107	purified 50ppm iron	Fungi	Ascomycota	Dothideomycetes	Pleosporales	Didymellaceae	Other <1%
ASV 33	0.00016742	UIC107	purified 50ppm iron	Fungi	Basidiomycota	Microbotryomycetes	Sporidiobolales	Sporidiobolaceae	Other <1%
ASV 443	0.00016742	UIC107	purified 50ppm iron	Fungi	Basidiomycota	Tremellomycetes	Cystofilobasidiales	Mrakiaceae	Other <1%
ASV 592	0.00016742	UIC107	purified 50ppm iron	Fungi	Basidiomycota	Exobasidiomycetes	Entylomatales	o__Entylomatales	Other <1%
ASV 596	0.00016742	UIC107	purified 50ppm iron	Fungi	Basidiomycota	Microbotryomycetes	Leucosporidiales	Leucosporidiaceae	Other <1%
ASV 8	0.00016742	UIC107	purified 50ppm iron	Fungi	Ascomycota	Dothideomycetes	Pleosporales	Didymellaceae	Other <1%
ASV 2	0.334643	UIC107	chow LM485	Fungi	Ascomycota	Eurotiomycetes	Eurotiales	Aspergillaceae	Aspergillus
ASV 14	0.121972	UIC107	chow LM485	Fungi	Ascomycota	Eurotiomycetes	Eurotiales	Aspergillaceae	Penicillium
ASV 3	0.0893901	UIC107	chow LM485	Fungi	Ascomycota	Dothideomycetes	Capnodiales	Cladosporiaceae	Cladosporium
ASV 8	0.0541695	UIC107	chow LM485	Fungi	Ascomycota	Dothideomycetes	Pleosporales	Didymellaceae	Ascochyta
ASV 192	0.037594	UIC107	chow LM485	Fungi	Ascomycota	Sordariomycetes	Hypocreales	Bionectriaceae	Clonostachys
ASV 130	0.036189	UIC107	chow LM485	Fungi	Ascomycota	Dothideomycetes	Pleosporales	Pleosporaceae	Stemphylium
ASV 9	0.0290499	UIC107	chow LM485	Fungi	Ascomycota	Dothideomycetes	Capnodiales	Mycosphaerellaceae	Mycosphaerella
ASV 25	0.0272082	UIC107	chow LM485	Fungi	Basidiomycota	Wallemiomycetes	Wallemiales	Wallemiaceae	Wallemia
ASV 7	0.0259171	UIC107	chow LM485	Fungi	Ascomycota	Eurotiomycetes	Eurotiales	Trichocomaceae	Talaromyces
ASV 6	0.0256512	UIC107	chow LM485	Fungi	Ascomycota	Dothideomycetes	Pleosporales	Pleosporaceae	Alternaria
ASV 137	0.0199932	UIC107	chow LM485	Fungi	Ascomycota	Eurotiomycetes	Eurotiales	Aspergillaceae	Xeromyces
ASV 74	0.0198223	UIC107	chow LM485	Fungi	Basidiomycota	Ustilaginomycetes	Ustilaginales	Ustilaginaceae	Ustilago
ASV 264	0.0196514	UIC107	chow LM485	Fungi	Ascomycota	Sordariomycetes	Hypocreales	Clavicipitaceae	Claviceps
ASV 17	0.0188729	UIC107	chow LM485	Fungi	Ascomycota	Sordariomycetes	Microascales	Microascaceae	Microascus
ASV 94	0.0161768	UIC107	chow LM485	Fungi	Basidiomycota	Agaricomycetes	c__Agaricomycetes	c__Agaricomycetes	c__Agaricomycetes
ASV 122	0.0157021	UIC107	chow LM485	Fungi	Basidiomycota	Microbotryomycetes	Sporidiobolales	Sporidiobolaceae	Rhodotorula
ASV 119	0.0152085	UIC107	chow LM485	Fungi	Ascomycota	Sordariomycetes	Glomerellales	Plectosphaerellaceae	Verticillium
ASV 155	0.0132908	UIC107	chow LM485	Fungi	Mucoromycota	Mucoromycetes	Mucorales	Lichtheimiaceae	Lichtheimia
ASV 113	0.00970229	UIC107	chow LM485	Fungi	Ascomycota	Dothideomycetes	Pleosporales	o__Pleosporales	Other <1%
ASV 63	0.0088099	UIC107	chow LM485	Fungi	Ascomycota	Sordariomycetes	Hypocreales	Hypocreales_fam_Incertae_sedis	Other <1%
ASV 62	0.00738589	UIC107	chow LM485	Fungi	Basidiomycota	Ustilaginomycetes	Ustilaginales	Ustilaginaceae	Other <1%
ASV 642	0.00558214	UIC107	chow LM485	Fungi	Ascomycota	Dothideomycetes	Pleosporales	Phaeosphaeriaceae	Other <1%
ASV 33	0.00499354	UIC107	chow LM485	Fungi	Basidiomycota	Microbotryomycetes	Sporidiobolales	Sporidiobolaceae	Other <1%
ASV 169	0.00474672	UIC107	chow LM485	Fungi	Basidiomycota	Tremellomycetes	Tremellales	Bulleribasidiaceae	Other <1%
ASV 256	0.004329	UIC107	chow LM485	Fungi	Ascomycota	Eurotiomycetes	Eurotiales	Thermoascaceae	Other <1%
ASV 12	0.00421508	UIC107	chow LM485	Fungi	Ascomycota	Sordariomycetes	Diaporthales	Diaporthaceae	Other <1%
ASV 18	0.00415812	UIC107	chow LM485	Fungi	Basidiomycota	Tremellomycetes	Tremellales	Bulleribasidiaceae	Other <1%
ASV 515	0.00406319	UIC107	chow LM485	Fungi	Basidiomycota	Exobasidiomycetes	Tilletiales	Tilletiaceae	Other <1%
ASV 563	0.00356953	UIC107	chow LM485	Fungi	Ascomycota	Saccharomycetes	Saccharomycetales	Dipodascaceae	Other <1%
ASV 446	0.00355054	UIC107	chow LM485	Fungi	Ascomycota	Sordariomycetes	Microascales	Microascaceae	Other <1%
ASV 806	0.00334169	UIC107	chow LM485	Fungi	Ascomycota	Dothideomycetes	Pleosporales	Phaeosphaeriaceae	Other <1%
ASV 465	0.00271512	UIC107	chow LM485	Fungi	Mucoromycota	Mucoromycetes	Mucorales	Mucoraceae	Other <1%
ASV 357	0.00263917	UIC107	chow LM485	Fungi	Ascomycota	Dothideomycetes	Pleosporales	Phaeosphaeriaceae	Other <1%
ASV 920	0.00212653	UIC107	chow LM485	Fungi	Basidiomycota	Tremellomycetes	Tremellales	Bulleribasidiaceae	Other <1%
ASV 846	0.00157591	UIC107	chow LM485	Fungi	Mucoromycota	Mucoromycetes	Mucorales	Rhizopodaceae	Other <1%
ASV 1062	0.000683527	UIC107	chow LM485	Fungi	Ascomycota	Saccharomycetes	Saccharomycetales	Dipodascaceae	Other <1%
ASV 53	0.000645553	UIC107	chow LM485	Fungi	Basidiomycota	Tremellomycetes	Filobasidiales	Filobasidiaceae	Other <1%
ASV 1319	0.000132908	UIC107	chow LM485	Fungi	Ascomycota	Saccharomycetes	Saccharomycetales	o__Saccharomycetales	Other <1%
ASV 44	7.59474e-05	UIC107	chow LM485	Fungi	Ascomycota	Saccharomycetes	Saccharomycetales	Saccharomycetaceae	Other <1%
ASV 1349	5.69606e-05	UIC107	chow LM485	Fungi	Ascomycota	Eurotiomycetes	Eurotiales	o__Eurotiales	Other <1%
ASV 568	5.69606e-05	UIC107	chow LM485	Fungi	Ascomycota	Eurotiomycetes	Onygenales	Onygenaceae	Other <1%
ASV 106	3.79737e-05	UIC107	chow LM485	Fungi	Basidiomycota	p__Basidiomycota	p__Basidiomycota	p__Basidiomycota	Other <1%
ASV 27	3.79737e-05	UIC107	chow LM485	Fungi	Ascomycota	Dothideomycetes	Dothideales	Aureobasidiaceae	Other <1%
ASV 30	3.79737e-05	UIC107	chow LM485	Fungi	Basidiomycota	Microbotryomycetes	Sporidiobolales	Sporidiobolaceae	Other <1%
ASV 110	1.89869e-05	UIC107	chow LM485	Fungi	Ascomycota	Dothideomycetes	Pleosporales	Phaeosphaeriaceae	Other <1%
ASV 154	1.89869e-05	UIC107	chow LM485	Fungi	Ascomycota	Sordariomycetes	Hypocreales	Hypocreales_fam_Incertae_sedis	Other <1%
ASV 164	1.89869e-05	UIC107	chow LM485	Fungi	Basidiomycota	Agaricomycetes	Agaricales	Omphalotaceae	Other <1%
ASV 2052	1.89869e-05	UIC107	chow LM485	Fungi	Ascomycota	Eurotiomycetes	Eurotiales	Aspergillaceae	Other <1%
ASV 26	1.89869e-05	UIC107	chow LM485	Fungi	Basidiomycota	Tremellomycetes	Cystofilobasidiales	Cystofilobasidiaceae	Other <1%
ASV 31	1.89869e-05	UIC107	chow LM485	Fungi	Ascomycota	Dothideomycetes	Pleosporales	Didymellaceae	Other <1%
ASV 310	1.89869e-05	UIC107	chow LM485	Fungi	Basidiomycota	Agaricomycetes	Agaricales	o__Agaricales	Other <1%
ASV 38	1.89869e-05	UIC107	chow LM485	Fungi	Ascomycota	Dothideomycetes	Capnodiales	Teratosphaeriaceae	Other <1%
ASV 386	1.89869e-05	UIC107	chow LM485	Fungi	Basidiomycota	Agaricomycetes	Russulales	Peniophoraceae	Other <1%
ASV 483	1.89869e-05	UIC107	chow LM485	Fungi	Ascomycota	Saccharomycetes	Saccharomycetales	Saccharomycetales_fam_Incertae_sedis	Other <1%
ASV 75	1.89869e-05	UIC107	chow LM485	Fungi	Basidiomycota	Tremellomycetes	Filobasidiales	Filobasidiaceae	Other <1%
ASV 84	1.89869e-05	UIC107	chow LM485	Fungi	Basidiomycota	Cystobasidiomycetes	Cystobasidiomycetes_ord_Incertae_sedis	Symmetrosporaceae	Other <1%
ASV 2	0.38782	UIC108	purified 50ppm iron	Fungi	Ascomycota	Eurotiomycetes	Eurotiales	Aspergillaceae	Aspergillus
ASV 104	0.183737	UIC108	purified 50ppm iron	Fungi	Chytridiomycota	p__Chytridiomycota	p__Chytridiomycota	p__Chytridiomycota	p__Chytridiomycota
ASV 3	0.0930409	UIC108	purified 50ppm iron	Fungi	Ascomycota	Dothideomycetes	Capnodiales	Cladosporiaceae	Cladosporium
ASV 280	0.0888337	UIC108	purified 50ppm iron	Fungi	Basidiomycota	Agaricomycetes	Polyporales	Polyporaceae	Fomes
ASV 25	0.0865577	UIC108	purified 50ppm iron	Fungi	Basidiomycota	Wallemiomycetes	Wallemiales	Wallemiaceae	Wallemia
ASV 45	0.0822126	UIC108	purified 50ppm iron	Fungi	Chytridiomycota	Rhizophydiomycetes	Rhizophydiales	Aquamycetaceae	Aquamyces
ASV 169	0.0711084	UIC108	purified 50ppm iron	Fungi	Basidiomycota	Tremellomycetes	Tremellales	Bulleribasidiaceae	Hannaella
ASV 465	0.00503483	UIC108	purified 50ppm iron	Fungi	Mucoromycota	Mucoromycetes	Mucorales	Mucoraceae	Other <1%
ASV 27	0.000344851	UIC108	purified 50ppm iron	Fungi	Ascomycota	Dothideomycetes	Dothideales	Aureobasidiaceae	Other <1%
ASV 12	0.000275881	UIC108	purified 50ppm iron	Fungi	Ascomycota	Sordariomycetes	Diaporthales	Diaporthaceae	Other <1%
ASV 14	0.000206911	UIC108	purified 50ppm iron	Fungi	Ascomycota	Eurotiomycetes	Eurotiales	Aspergillaceae	Other <1%
ASV 53	0.000137941	UIC108	purified 50ppm iron	Fungi	Basidiomycota	Tremellomycetes	Filobasidiales	Filobasidiaceae	Other <1%
ASV 840	0.000137941	UIC108	purified 50ppm iron	Fungi	Basidiomycota	Tremellomycetes	Tremellales	Rhynchogastremataceae	Other <1%
ASV 137	6.89703e-05	UIC108	purified 50ppm iron	Fungi	Ascomycota	Eurotiomycetes	Eurotiales	Aspergillaceae	Other <1%
ASV 155	6.89703e-05	UIC108	purified 50ppm iron	Fungi	Mucoromycota	Mucoromycetes	Mucorales	Lichtheimiaceae	Other <1%
ASV 161	6.89703e-05	UIC108	purified 50ppm iron	Fungi	Basidiomycota	Tremellomycetes	Tremellales	Trimorphomycetaceae	Other <1%
ASV 33	6.89703e-05	UIC108	purified 50ppm iron	Fungi	Basidiomycota	Microbotryomycetes	Sporidiobolales	Sporidiobolaceae	Other <1%
ASV 63	6.89703e-05	UIC108	purified 50ppm iron	Fungi	Ascomycota	Sordariomycetes	Hypocreales	Hypocreales_fam_Incertae_sedis	Other <1%
ASV 7	6.89703e-05	UIC108	purified 50ppm iron	Fungi	Ascomycota	Eurotiomycetes	Eurotiales	Trichocomaceae	Other <1%
ASV 75	6.89703e-05	UIC108	purified 50ppm iron	Fungi	Basidiomycota	Tremellomycetes	Filobasidiales	Filobasidiaceae	Other <1%
ASV 80	6.89703e-05	UIC108	purified 50ppm iron	Fungi	Basidiomycota	Malasseziomycetes	Malasseziales	Malasseziaceae	Other <1%
ASV 2	0.226384	UIC108	chow LM485	Fungi	Ascomycota	Eurotiomycetes	Eurotiales	Aspergillaceae	Aspergillus
ASV 17	0.21162	UIC108	chow LM485	Fungi	Ascomycota	Sordariomycetes	Microascales	Microascaceae	Microascus
ASV 14	0.204451	UIC108	chow LM485	Fungi	Ascomycota	Eurotiomycetes	Eurotiales	Aspergillaceae	Penicillium
ASV 6	0.0948436	UIC108	chow LM485	Fungi	Ascomycota	Dothideomycetes	Pleosporales	Pleosporaceae	Alternaria
ASV 3	0.0653852	UIC108	chow LM485	Fungi	Ascomycota	Dothideomycetes	Capnodiales	Cladosporiaceae	Cladosporium
ASV 154	0.02299	UIC108	chow LM485	Fungi	Ascomycota	Sordariomycetes	Hypocreales	Hypocreales_fam_Incertae_sedis	f__Hypocreales_fam_Incertae_sedis
ASV 41	0.0194513	UIC108	chow LM485	Fungi	Ascomycota	Sordariomycetes	Hypocreales	Nectriaceae	Fusarium
ASV 114	0.0156713	UIC108	chow LM485	Fungi	Basidiomycota	Agaricomycetes	Phallales	Phallaceae	Phallus
ASV 8	0.0148211	UIC108	chow LM485	Fungi	Ascomycota	Dothideomycetes	Pleosporales	Didymellaceae	Ascochyta
ASV 18	0.0115237	UIC108	chow LM485	Fungi	Basidiomycota	Tremellomycetes	Tremellales	Bulleribasidiaceae	Vishniacozyma
ASV 33	0.0107884	UIC108	chow LM485	Fungi	Basidiomycota	Microbotryomycetes	Sporidiobolales	Sporidiobolaceae	Sporobolomyces
ASV 7	0.00988074	UIC108	chow LM485	Fungi	Ascomycota	Eurotiomycetes	Eurotiales	Trichocomaceae	Other <1%
ASV 408	0.00859395	UIC108	chow LM485	Fungi	Ascomycota	Sordariomycetes	Glomerellales	Plectosphaerellaceae	Other <1%
ASV 9	0.0085365	UIC108	chow LM485	Fungi	Ascomycota	Dothideomycetes	Capnodiales	Mycosphaerellaceae	Other <1%
ASV 155	0.00839863	UIC108	chow LM485	Fungi	Mucoromycota	Mucoromycetes	Mucorales	Lichtheimiaceae	Other <1%
ASV 28	0.00829523	UIC108	chow LM485	Fungi	Ascomycota	Leotiomycetes	Helotiales	Myxotrichaceae	Other <1%
ASV 422	0.00792757	UIC108	chow LM485	Fungi	Ascomycota	Sordariomycetes	Xylariales	Apiosporaceae	Other <1%
ASV 483	0.00635355	UIC108	chow LM485	Fungi	Ascomycota	Saccharomycetes	Saccharomycetales	Saccharomycetales_fam_Incertae_sedis	Other <1%
ASV 12	0.00606632	UIC108	chow LM485	Fungi	Ascomycota	Sordariomycetes	Diaporthales	Diaporthaceae	Other <1%
ASV 36	0.00468761	UIC108	chow LM485	Fungi	Ascomycota	Sordariomycetes	Hypocreales	Hypocreaceae	Other <1%
ASV 537	0.00434293	UIC108	chow LM485	Fungi	Chytridiomycota	Rhizophydiomycetes	Rhizophydiales	Alphamycetaceae	Other <1%
ASV 113	0.00430846	UIC108	chow LM485	Fungi	Ascomycota	Dothideomycetes	Pleosporales	o__Pleosporales	Other <1%
ASV 568	0.00399825	UIC108	chow LM485	Fungi	Ascomycota	Eurotiomycetes	Onygenales	Onygenaceae	Other <1%
ASV 707	0.00275742	UIC108	chow LM485	Fungi	Ascomycota	Eurotiomycetes	Onygenales	Onygenales_fam_Incertae_sedis	Other <1%
ASV 443	0.00259657	UIC108	chow LM485	Fungi	Basidiomycota	Tremellomycetes	Cystofilobasidiales	Mrakiaceae	Other <1%
ASV 111	0.00228636	UIC108	chow LM485	Fungi	Basidiomycota	Ustilaginomycetes	Ustilaginales	Ustilaginaceae	Other <1%
ASV 53	0.00228636	UIC108	chow LM485	Fungi	Basidiomycota	Tremellomycetes	Filobasidiales	Filobasidiaceae	Other <1%
ASV 25	0.00222891	UIC108	chow LM485	Fungi	Basidiomycota	Wallemiomycetes	Wallemiales	Wallemiaceae	Other <1%
ASV 62	0.00212551	UIC108	chow LM485	Fungi	Basidiomycota	Ustilaginomycetes	Ustilaginales	Ustilaginaceae	Other <1%
ASV 465	0.00211402	UIC108	chow LM485	Fungi	Mucoromycota	Mucoromycetes	Mucorales	Mucoraceae	Other <1%
ASV 169	0.00147062	UIC108	chow LM485	Fungi	Basidiomycota	Tremellomycetes	Tremellales	Bulleribasidiaceae	Other <1%
ASV 846	0.00137871	UIC108	chow LM485	Fungi	Mucoromycota	Mucoromycetes	Mucorales	Rhizopodaceae	Other <1%
ASV 1015	0.000700843	UIC108	chow LM485	Fungi	Ascomycota	Saccharomycetes	Saccharomycetales	Debaryomycetaceae	Other <1%
ASV 75	0.000344677	UIC108	chow LM485	Fungi	Basidiomycota	Tremellomycetes	Filobasidiales	Filobasidiaceae	Other <1%
ASV 26	5.74462e-05	UIC108	chow LM485	Fungi	Basidiomycota	Tremellomycetes	Cystofilobasidiales	Cystofilobasidiaceae	Other <1%
ASV 30	4.59569e-05	UIC108	chow LM485	Fungi	Basidiomycota	Microbotryomycetes	Sporidiobolales	Sporidiobolaceae	Other <1%
ASV 598	4.59569e-05	UIC108	chow LM485	Fungi	Mucoromycota	Mucoromycetes	Mucorales	Mucoraceae	Other <1%
ASV 133	2.29785e-05	UIC108	chow LM485	Fungi	Ascomycota	Dothideomycetes	Capnodiales	o__Capnodiales	Other <1%
ASV 1626	2.29785e-05	UIC108	chow LM485	Fungi	Ascomycota	Sordariomycetes	Hypocreales	o__Hypocreales	Other <1%
ASV 55	2.29785e-05	UIC108	chow LM485	Fungi	Ascomycota	Dothideomycetes	Capnodiales	Mycosphaerellaceae	Other <1%
ASV 720	2.29785e-05	UIC108	chow LM485	Fungi	Ascomycota	Sordariomycetes	Hypocreales	Hypocreales_fam_Incertae_sedis	Other <1%
ASV 74	2.29785e-05	UIC108	chow LM485	Fungi	Basidiomycota	Ustilaginomycetes	Ustilaginales	Ustilaginaceae	Other <1%
ASV 94	2.29785e-05	UIC108	chow LM485	Fungi	Basidiomycota	Agaricomycetes	c__Agaricomycetes	c__Agaricomycetes	Other <1%
ASV 106	1.14892e-05	UIC108	chow LM485	Fungi	Basidiomycota	p__Basidiomycota	p__Basidiomycota	p__Basidiomycota	Other <1%
ASV 130	1.14892e-05	UIC108	chow LM485	Fungi	Ascomycota	Dothideomycetes	Pleosporales	Pleosporaceae	Other <1%
ASV 163	1.14892e-05	UIC108	chow LM485	Fungi	Ascomycota	Sordariomycetes	Glomerellales	Plectosphaerellaceae	Other <1%
ASV 264	1.14892e-05	UIC108	chow LM485	Fungi	Ascomycota	Sordariomycetes	Hypocreales	Clavicipitaceae	Other <1%
ASV 38	1.14892e-05	UIC108	chow LM485	Fungi	Ascomycota	Dothideomycetes	Capnodiales	Teratosphaeriaceae	Other <1%
ASV 403	1.14892e-05	UIC108	chow LM485	Fungi	Basidiomycota	Malasseziomycetes	Malasseziales	o__Malasseziales	Other <1%
ASV 563	1.14892e-05	UIC108	chow LM485	Fungi	Ascomycota	Saccharomycetes	Saccharomycetales	Dipodascaceae	Other <1%
ASV 650	1.14892e-05	UIC108	chow LM485	Fungi	Basidiomycota	Agaricomycetes	Agaricales	Strophariaceae	Other <1%
ASV 80	1.14892e-05	UIC108	chow LM485	Fungi	Basidiomycota	Malasseziomycetes	Malasseziales	Malasseziaceae	Other <1%
ASV 38	0.442865	UIC109	purified 50ppm iron	Fungi	Ascomycota	Dothideomycetes	Capnodiales	Teratosphaeriaceae	Neocatenulostroma
ASV 45	0.15637	UIC109	purified 50ppm iron	Fungi	Chytridiomycota	Rhizophydiomycetes	Rhizophydiales	Aquamycetaceae	Aquamyces
ASV 80	0.111224	UIC109	purified 50ppm iron	Fungi	Basidiomycota	Malasseziomycetes	Malasseziales	Malasseziaceae	Malassezia
ASV 307	0.0931032	UIC109	purified 50ppm iron	Fungi	Basidiomycota	Agaricomycetes	Russulales	Stereaceae	Stereum
ASV 62	0.0864641	UIC109	purified 50ppm iron	Fungi	Basidiomycota	Ustilaginomycetes	Ustilaginales	Ustilaginaceae	Pseudozyma
ASV 319	0.0861517	UIC109	purified 50ppm iron	Fungi	Ascomycota	Leotiomycetes	Helotiales	Dermateaceae	Pseudopeziza
ASV 465	0.0201515	UIC109	purified 50ppm iron	Fungi	Mucoromycota	Mucoromycetes	Mucorales	Mucoraceae	Mucor
ASV 2	0.00156213	UIC109	purified 50ppm iron	Fungi	Ascomycota	Eurotiomycetes	Eurotiales	Aspergillaceae	Other <1%
ASV 27	0.00046864	UIC109	purified 50ppm iron	Fungi	Ascomycota	Dothideomycetes	Dothideales	Aureobasidiaceae	Other <1%
ASV 12	0.00023432	UIC109	purified 50ppm iron	Fungi	Ascomycota	Sordariomycetes	Diaporthales	Diaporthaceae	Other <1%
ASV 104	0.000156213	UIC109	purified 50ppm iron	Fungi	Chytridiomycota	p__Chytridiomycota	p__Chytridiomycota	p__Chytridiomycota	Other <1%
ASV 18	0.000156213	UIC109	purified 50ppm iron	Fungi	Basidiomycota	Tremellomycetes	Tremellales	Bulleribasidiaceae	Other <1%
ASV 3	0.000156213	UIC109	purified 50ppm iron	Fungi	Ascomycota	Dothideomycetes	Capnodiales	Cladosporiaceae	Other <1%
ASV 8	0.000156213	UIC109	purified 50ppm iron	Fungi	Ascomycota	Dothideomycetes	Pleosporales	Didymellaceae	Other <1%
ASV 122	7.81067e-05	UIC109	purified 50ppm iron	Fungi	Basidiomycota	Microbotryomycetes	Sporidiobolales	Sporidiobolaceae	Other <1%
ASV 137	7.81067e-05	UIC109	purified 50ppm iron	Fungi	Ascomycota	Eurotiomycetes	Eurotiales	Aspergillaceae	Other <1%
ASV 159	7.81067e-05	UIC109	purified 50ppm iron	Fungi	Basidiomycota	Tremellomycetes	Trichosporonales	Trichosporonaceae	Other <1%
ASV 25	7.81067e-05	UIC109	purified 50ppm iron	Fungi	Basidiomycota	Wallemiomycetes	Wallemiales	Wallemiaceae	Other <1%
ASV 301	7.81067e-05	UIC109	purified 50ppm iron	Fungi	Basidiomycota	Cystobasidiomycetes	Erythrobasidiales	Erythrobasidiaceae	Other <1%
ASV 36	7.81067e-05	UIC109	purified 50ppm iron	Fungi	Ascomycota	Sordariomycetes	Hypocreales	Hypocreaceae	Other <1%
ASV 596	7.81067e-05	UIC109	purified 50ppm iron	Fungi	Basidiomycota	Microbotryomycetes	Leucosporidiales	Leucosporidiaceae	Other <1%
ASV 6	7.81067e-05	UIC109	purified 50ppm iron	Fungi	Ascomycota	Dothideomycetes	Pleosporales	Pleosporaceae	Other <1%
ASV 75	7.81067e-05	UIC109	purified 50ppm iron	Fungi	Basidiomycota	Tremellomycetes	Filobasidiales	Filobasidiaceae	Other <1%
ASV 9	7.81067e-05	UIC109	purified 50ppm iron	Fungi	Ascomycota	Dothideomycetes	Capnodiales	Mycosphaerellaceae	Other <1%
ASV 27	0.250599	UIC109	chow LM485	Fungi	Ascomycota	Dothideomycetes	Dothideales	Aureobasidiaceae	Aureobasidium
ASV 2	0.230433	UIC109	chow LM485	Fungi	Ascomycota	Eurotiomycetes	Eurotiales	Aspergillaceae	Aspergillus
ASV 3	0.107911	UIC109	chow LM485	Fungi	Ascomycota	Dothideomycetes	Capnodiales	Cladosporiaceae	Cladosporium
ASV 14	0.0800761	UIC109	chow LM485	Fungi	Ascomycota	Eurotiomycetes	Eurotiales	Aspergillaceae	Penicillium
ASV 8	0.0462393	UIC109	chow LM485	Fungi	Ascomycota	Dothideomycetes	Pleosporales	Didymellaceae	Ascochyta
ASV 9	0.0358099	UIC109	chow LM485	Fungi	Ascomycota	Dothideomycetes	Capnodiales	Mycosphaerellaceae	Mycosphaerella
ASV 155	0.0288687	UIC109	chow LM485	Fungi	Mucoromycota	Mucoromycetes	Mucorales	Lichtheimiaceae	Lichtheimia
ASV 7	0.0232077	UIC109	chow LM485	Fungi	Ascomycota	Eurotiomycetes	Eurotiales	Trichocomaceae	Talaromyces
ASV 54	0.0225618	UIC109	chow LM485	Fungi	Basidiomycota	Tremellomycetes	Tremellales	Tremellaceae	Bulleromyces
ASV 17	0.0225031	UIC109	chow LM485	Fungi	Ascomycota	Sordariomycetes	Microascales	Microascaceae	Microascus
ASV 6	0.0201071	UIC109	chow LM485	Fungi	Ascomycota	Dothideomycetes	Pleosporales	Pleosporaceae	Alternaria
ASV 286	0.0149277	UIC109	chow LM485	Fungi	Basidiomycota	Agaricomycetes	Agaricales	Psathyrellaceae	Psathyrella
ASV 18	0.00999483	UIC109	chow LM485	Fungi	Basidiomycota	Tremellomycetes	Tremellales	Bulleribasidiaceae	Other <1%
ASV 46	0.00963074	UIC109	chow LM485	Fungi	Ascomycota	Sordariomycetes	Hypocreales	Nectriaceae	Other <1%
ASV 41	0.00957202	UIC109	chow LM485	Fungi	Ascomycota	Sordariomycetes	Hypocreales	Nectriaceae	Other <1%
ASV 339	0.0092784	UIC109	chow LM485	Fungi	Ascomycota	Sordariomycetes	Xylariales	Hyponectriaceae	Other <1%
ASV 25	0.00829184	UIC109	chow LM485	Fungi	Basidiomycota	Wallemiomycetes	Wallemiales	Wallemiaceae	Other <1%
ASV 62	0.00743446	UIC109	chow LM485	Fungi	Basidiomycota	Ustilaginomycetes	Ustilaginales	Ustilaginaceae	Other <1%
ASV 169	0.00738748	UIC109	chow LM485	Fungi	Basidiomycota	Tremellomycetes	Tremellales	Bulleribasidiaceae	Other <1%
ASV 154	0.00717608	UIC109	chow LM485	Fungi	Ascomycota	Sordariomycetes	Hypocreales	Hypocreales_fam_Incertae_sedis	Other <1%
ASV 515	0.00552006	UIC109	chow LM485	Fungi	Basidiomycota	Exobasidiomycetes	Tilletiales	Tilletiaceae	Other <1%
ASV 12	0.00402847	UIC109	chow LM485	Fungi	Ascomycota	Sordariomycetes	Diaporthales	Diaporthaceae	Other <1%
ASV 111	0.0036174	UIC109	chow LM485	Fungi	Basidiomycota	Ustilaginomycetes	Ustilaginales	Ustilaginaceae	Other <1%
ASV 30	0.00314761	UIC109	chow LM485	Fungi	Basidiomycota	Microbotryomycetes	Sporidiobolales	Sporidiobolaceae	Other <1%
ASV 122	0.00312412	UIC109	chow LM485	Fungi	Basidiomycota	Microbotryomycetes	Sporidiobolales	Sporidiobolaceae	Other <1%
ASV 28	0.00304191	UIC109	chow LM485	Fungi	Ascomycota	Leotiomycetes	Helotiales	Myxotrichaceae	Other <1%
ASV 157	0.00279526	UIC109	chow LM485	Fungi	Mucoromycota	Mucoromycetes	Mucorales	Lichtheimiaceae	Other <1%
ASV 443	0.00270131	UIC109	chow LM485	Fungi	Basidiomycota	Tremellomycetes	Cystofilobasidiales	Mrakiaceae	Other <1%
ASV 45	0.00264258	UIC109	chow LM485	Fungi	Chytridiomycota	Rhizophydiomycetes	Rhizophydiales	Aquamycetaceae	Other <1%
ASV 720	0.00264258	UIC109	chow LM485	Fungi	Ascomycota	Sordariomycetes	Hypocreales	Hypocreales_fam_Incertae_sedis	Other <1%
ASV 446	0.002255	UIC109	chow LM485	Fungi	Ascomycota	Sordariomycetes	Microascales	Microascaceae	Other <1%
ASV 113	0.0020436	UIC109	chow LM485	Fungi	Ascomycota	Dothideomycetes	Pleosporales	o__Pleosporales	Other <1%
ASV 74	0.00198487	UIC109	chow LM485	Fungi	Basidiomycota	Ustilaginomycetes	Ustilaginales	Ustilaginaceae	Other <1%
ASV 465	0.00182045	UIC109	chow LM485	Fungi	Mucoromycota	Mucoromycetes	Mucorales	Mucoraceae	Other <1%
ASV 846	0.00174998	UIC109	chow LM485	Fungi	Mucoromycota	Mucoromycetes	Mucorales	Rhizopodaceae	Other <1%
ASV 33	0.00159729	UIC109	chow LM485	Fungi	Basidiomycota	Microbotryomycetes	Sporidiobolales	Sporidiobolaceae	Other <1%
ASV 53	0.00120972	UIC109	chow LM485	Fungi	Basidiomycota	Tremellomycetes	Filobasidiales	Filobasidiaceae	Other <1%
ASV 36	0.00110401	UIC109	chow LM485	Fungi	Ascomycota	Sordariomycetes	Hypocreales	Hypocreaceae	Other <1%
ASV 568	0.000364089	UIC109	chow LM485	Fungi	Ascomycota	Eurotiomycetes	Onygenales	Onygenaceae	Other <1%
ASV 1109	0.000352344	UIC109	chow LM485	Fungi	Ascomycota	Laboulbeniomycetes	Pyxidiophorales	Pyxidiophoraceae	Other <1%
ASV 55	4.69792e-05	UIC109	chow LM485	Fungi	Ascomycota	Dothideomycetes	Capnodiales	Mycosphaerellaceae	Other <1%
ASV 483	3.52344e-05	UIC109	chow LM485	Fungi	Ascomycota	Saccharomycetes	Saccharomycetales	Saccharomycetales_fam_Incertae_sedis	Other <1%
ASV 106	2.34896e-05	UIC109	chow LM485	Fungi	Basidiomycota	p__Basidiomycota	p__Basidiomycota	p__Basidiomycota	Other <1%
ASV 264	2.34896e-05	UIC109	chow LM485	Fungi	Ascomycota	Sordariomycetes	Hypocreales	Clavicipitaceae	Other <1%
ASV 1057	1.17448e-05	UIC109	chow LM485	Fungi	Basidiomycota	Cystobasidiomycetes	Cystobasidiales	Cystobasidiaceae	Other <1%
ASV 1310	1.17448e-05	UIC109	chow LM485	Fungi	Basidiomycota	Agaricomycetes	Agaricales	Lyophyllaceae	Other <1%
ASV 247	1.17448e-05	UIC109	chow LM485	Fungi	Basidiomycota	Agaricomycetes	Agaricales	Tricholomataceae	Other <1%
ASV 26	1.17448e-05	UIC109	chow LM485	Fungi	Basidiomycota	Tremellomycetes	Cystofilobasidiales	Cystofilobasidiaceae	Other <1%
ASV 269	1.17448e-05	UIC109	chow LM485	Fungi	Chytridiomycota	Rhizophydiomycetes	Rhizophydiales	o__Rhizophydiales	Other <1%
ASV 38	1.17448e-05	UIC109	chow LM485	Fungi	Ascomycota	Dothideomycetes	Capnodiales	Teratosphaeriaceae	Other <1%
ASV 570	1.17448e-05	UIC109	chow LM485	Fungi	Rozellomycota	p__Rozellomycota	p__Rozellomycota	p__Rozellomycota	Other <1%
ASV 80	1.17448e-05	UIC109	chow LM485	Fungi	Basidiomycota	Malasseziomycetes	Malasseziales	Malasseziaceae	Other <1%
ASV 84	1.17448e-05	UIC109	chow LM485	Fungi	Basidiomycota	Cystobasidiomycetes	Cystobasidiomycetes_ord_Incertae_sedis	Symmetrosporaceae	Other <1%
ASV 94	1.17448e-05	UIC109	chow LM485	Fungi	Basidiomycota	Agaricomycetes	c__Agaricomycetes	c__Agaricomycetes	Other <1%
ASV 80	0.551256	UIC110	purified 50ppm iron	Fungi	Basidiomycota	Malasseziomycetes	Malasseziales	Malasseziaceae	Malassezia
ASV 12	0.288791	UIC110	purified 50ppm iron	Fungi	Ascomycota	Sordariomycetes	Diaporthales	Diaporthaceae	Stenocarpella
ASV 45	0.149382	UIC110	purified 50ppm iron	Fungi	Chytridiomycota	Rhizophydiomycetes	Rhizophydiales	Aquamycetaceae	Aquamyces
ASV 2	0.00199442	UIC110	purified 50ppm iron	Fungi	Ascomycota	Eurotiomycetes	Eurotiales	Aspergillaceae	Other <1%
ASV 3	0.00119665	UIC110	purified 50ppm iron	Fungi	Ascomycota	Dothideomycetes	Capnodiales	Cladosporiaceae	Other <1%
ASV 27	0.000797766	UIC110	purified 50ppm iron	Fungi	Ascomycota	Dothideomycetes	Dothideales	Aureobasidiaceae	Other <1%
ASV 18	0.000598325	UIC110	purified 50ppm iron	Fungi	Basidiomycota	Tremellomycetes	Tremellales	Bulleribasidiaceae	Other <1%
ASV 8	0.000598325	UIC110	purified 50ppm iron	Fungi	Ascomycota	Dothideomycetes	Pleosporales	Didymellaceae	Other <1%
ASV 9	0.000598325	UIC110	purified 50ppm iron	Fungi	Ascomycota	Dothideomycetes	Capnodiales	Mycosphaerellaceae	Other <1%
ASV 14	0.000398883	UIC110	purified 50ppm iron	Fungi	Ascomycota	Eurotiomycetes	Eurotiales	Aspergillaceae	Other <1%
ASV 33	0.000398883	UIC110	purified 50ppm iron	Fungi	Basidiomycota	Microbotryomycetes	Sporidiobolales	Sporidiobolaceae	Other <1%
ASV 36	0.000398883	UIC110	purified 50ppm iron	Fungi	Ascomycota	Sordariomycetes	Hypocreales	Hypocreaceae	Other <1%
ASV 7	0.000398883	UIC110	purified 50ppm iron	Fungi	Ascomycota	Eurotiomycetes	Eurotiales	Trichocomaceae	Other <1%
ASV 840	0.000398883	UIC110	purified 50ppm iron	Fungi	Basidiomycota	Tremellomycetes	Tremellales	Rhynchogastremataceae	Other <1%
ASV 113	0.000199442	UIC110	purified 50ppm iron	Fungi	Ascomycota	Dothideomycetes	Pleosporales	o__Pleosporales	Other <1%
ASV 155	0.000199442	UIC110	purified 50ppm iron	Fungi	Mucoromycota	Mucoromycetes	Mucorales	Lichtheimiaceae	Other <1%
ASV 159	0.000199442	UIC110	purified 50ppm iron	Fungi	Basidiomycota	Tremellomycetes	Trichosporonales	Trichosporonaceae	Other <1%
ASV 161	0.000199442	UIC110	purified 50ppm iron	Fungi	Basidiomycota	Tremellomycetes	Tremellales	Trimorphomycetaceae	Other <1%
ASV 17	0.000199442	UIC110	purified 50ppm iron	Fungi	Ascomycota	Sordariomycetes	Microascales	Microascaceae	Other <1%
ASV 25	0.000199442	UIC110	purified 50ppm iron	Fungi	Basidiomycota	Wallemiomycetes	Wallemiales	Wallemiaceae	Other <1%
ASV 264	0.000199442	UIC110	purified 50ppm iron	Fungi	Ascomycota	Sordariomycetes	Hypocreales	Clavicipitaceae	Other <1%
ASV 357	0.000199442	UIC110	purified 50ppm iron	Fungi	Ascomycota	Dothideomycetes	Pleosporales	Phaeosphaeriaceae	Other <1%
ASV 447	0.000199442	UIC110	purified 50ppm iron	Fungi	Basidiomycota	Ustilaginomycetes	Urocystidales	Glomosporiaceae	Other <1%
ASV 512	0.000199442	UIC110	purified 50ppm iron	Fungi	Basidiomycota	Tremellomycetes	Trichosporonales	Trichosporonaceae	Other <1%
ASV 519	0.000199442	UIC110	purified 50ppm iron	Fungi	Ascomycota	Sordariomycetes	Microascales	Microascaceae	Other <1%
ASV 6	0.000199442	UIC110	purified 50ppm iron	Fungi	Ascomycota	Dothideomycetes	Pleosporales	Pleosporaceae	Other <1%
ASV 66	0.000199442	UIC110	purified 50ppm iron	Fungi	Ascomycota	Eurotiomycetes	Eurotiales	Trichocomaceae	Other <1%
ASV 74	0.000199442	UIC110	purified 50ppm iron	Fungi	Basidiomycota	Ustilaginomycetes	Ustilaginales	Ustilaginaceae	Other <1%
ASV 2	0.209282	UIC110	chow LM485	Fungi	Ascomycota	Eurotiomycetes	Eurotiales	Aspergillaceae	Aspergillus
ASV 14	0.151168	UIC110	chow LM485	Fungi	Ascomycota	Eurotiomycetes	Eurotiales	Aspergillaceae	Penicillium
ASV 41	0.107623	UIC110	chow LM485	Fungi	Ascomycota	Sordariomycetes	Hypocreales	Nectriaceae	Fusarium
ASV 3	0.0992701	UIC110	chow LM485	Fungi	Ascomycota	Dothideomycetes	Capnodiales	Cladosporiaceae	Cladosporium
ASV 9	0.0466307	UIC110	chow LM485	Fungi	Ascomycota	Dothideomycetes	Capnodiales	Mycosphaerellaceae	Mycosphaerella
ASV 18	0.0427287	UIC110	chow LM485	Fungi	Basidiomycota	Tremellomycetes	Tremellales	Bulleribasidiaceae	Vishniacozyma
ASV 110	0.0400582	UIC110	chow LM485	Fungi	Ascomycota	Dothideomycetes	Pleosporales	Phaeosphaeriaceae	f__Phaeosphaeriaceae
ASV 74	0.0312305	UIC110	chow LM485	Fungi	Basidiomycota	Ustilaginomycetes	Ustilaginales	Ustilaginaceae	Ustilago
ASV 201	0.0286342	UIC110	chow LM485	Fungi	Ascomycota	Dothideomycetes	Pleosporales	Didymellaceae	Didymella
ASV 36	0.0253405	UIC110	chow LM485	Fungi	Ascomycota	Sordariomycetes	Hypocreales	Hypocreaceae	Trichoderma
ASV 8	0.0250883	UIC110	chow LM485	Fungi	Ascomycota	Dothideomycetes	Pleosporales	Didymellaceae	Ascochyta
ASV 7	0.0218391	UIC110	chow LM485	Fungi	Ascomycota	Eurotiomycetes	Eurotiales	Trichocomaceae	Talaromyces
ASV 33	0.0214979	UIC110	chow LM485	Fungi	Basidiomycota	Microbotryomycetes	Sporidiobolales	Sporidiobolaceae	Sporobolomyces
ASV 169	0.0190499	UIC110	chow LM485	Fungi	Basidiomycota	Tremellomycetes	Tremellales	Bulleribasidiaceae	Hannaella
ASV 25	0.0171508	UIC110	chow LM485	Fungi	Basidiomycota	Wallemiomycetes	Wallemiales	Wallemiaceae	Wallemia
ASV 120	0.0164535	UIC110	chow LM485	Fungi	Ascomycota	Sordariomycetes	Trichosphaeriales	Trichosphaeriaceae	Nigrospora
ASV 357	0.0142577	UIC110	chow LM485	Fungi	Ascomycota	Dothideomycetes	Pleosporales	Phaeosphaeriaceae	Neosetophoma
ASV 403	0.0112756	UIC110	chow LM485	Fungi	Basidiomycota	Malasseziomycetes	Malasseziales	o__Malasseziales	o__Malasseziales
ASV 111	0.0085309	UIC110	chow LM485	Fungi	Basidiomycota	Ustilaginomycetes	Ustilaginales	Ustilaginaceae	Other <1%
ASV 137	0.00818967	UIC110	chow LM485	Fungi	Ascomycota	Eurotiomycetes	Eurotiales	Aspergillaceae	Other <1%
ASV 155	0.0078336	UIC110	chow LM485	Fungi	Mucoromycota	Mucoromycetes	Mucorales	Lichtheimiaceae	Other <1%
ASV 75	0.00744785	UIC110	chow LM485	Fungi	Basidiomycota	Tremellomycetes	Filobasidiales	Filobasidiaceae	Other <1%
ASV 629	0.00694341	UIC110	chow LM485	Fungi	Mucoromycota	Mucoromycetes	Mucorales	Lichtheimiaceae	Other <1%
ASV 531	0.00660218	UIC110	chow LM485	Fungi	Ascomycota	Eurotiomycetes	Eurotiales	Aspergillaceae	Other <1%
ASV 570	0.00563781	UIC110	chow LM485	Fungi	Rozellomycota	p__Rozellomycota	p__Rozellomycota	p__Rozellomycota	Other <1%
ASV 6	0.00474763	UIC110	chow LM485	Fungi	Ascomycota	Dothideomycetes	Pleosporales	Pleosporaceae	Other <1%
ASV 650	0.00421352	UIC110	chow LM485	Fungi	Basidiomycota	Agaricomycetes	Agaricales	Strophariaceae	Other <1%
ASV 62	0.00351622	UIC110	chow LM485	Fungi	Basidiomycota	Ustilaginomycetes	Ustilaginales	Ustilaginaceae	Other <1%
ASV 106	0.00314531	UIC110	chow LM485	Fungi	Basidiomycota	p__Basidiomycota	p__Basidiomycota	p__Basidiomycota	Other <1%
ASV 707	0.00289309	UIC110	chow LM485	Fungi	Ascomycota	Eurotiomycetes	Onygenales	Onygenales_fam_Incertae_sedis	Other <1%
ASV 465	0.000845672	UIC110	chow LM485	Fungi	Mucoromycota	Mucoromycetes	Mucorales	Mucoraceae	Other <1%
ASV 846	0.0003264	UIC110	chow LM485	Fungi	Mucoromycota	Mucoromycetes	Mucorales	Rhizopodaceae	Other <1%
ASV 483	8.90181e-05	UIC110	chow LM485	Fungi	Ascomycota	Saccharomycetes	Saccharomycetales	Saccharomycetales_fam_Incertae_sedis	Other <1%
ASV 84	7.41818e-05	UIC110	chow LM485	Fungi	Basidiomycota	Cystobasidiomycetes	Cystobasidiomycetes_ord_Incertae_sedis	Symmetrosporaceae	Other <1%
ASV 55	5.93454e-05	UIC110	chow LM485	Fungi	Ascomycota	Dothideomycetes	Capnodiales	Mycosphaerellaceae	Other <1%
ASV 192	4.45091e-05	UIC110	chow LM485	Fungi	Ascomycota	Sordariomycetes	Hypocreales	Bionectriaceae	Other <1%
ASV 27	4.45091e-05	UIC110	chow LM485	Fungi	Ascomycota	Dothideomycetes	Dothideales	Aureobasidiaceae	Other <1%
ASV 30	4.45091e-05	UIC110	chow LM485	Fungi	Basidiomycota	Microbotryomycetes	Sporidiobolales	Sporidiobolaceae	Other <1%
ASV 17	2.96727e-05	UIC110	chow LM485	Fungi	Ascomycota	Sordariomycetes	Microascales	Microascaceae	Other <1%
ASV 38	2.96727e-05	UIC110	chow LM485	Fungi	Ascomycota	Dothideomycetes	Capnodiales	Teratosphaeriaceae	Other <1%
ASV 104	1.48364e-05	UIC110	chow LM485	Fungi	Chytridiomycota	p__Chytridiomycota	p__Chytridiomycota	p__Chytridiomycota	Other <1%
ASV 12	1.48364e-05	UIC110	chow LM485	Fungi	Ascomycota	Sordariomycetes	Diaporthales	Diaporthaceae	Other <1%
ASV 133	1.48364e-05	UIC110	chow LM485	Fungi	Ascomycota	Dothideomycetes	Capnodiales	o__Capnodiales	Other <1%
ASV 157	1.48364e-05	UIC110	chow LM485	Fungi	Mucoromycota	Mucoromycetes	Mucorales	Lichtheimiaceae	Other <1%
ASV 26	1.48364e-05	UIC110	chow LM485	Fungi	Basidiomycota	Tremellomycetes	Cystofilobasidiales	Cystofilobasidiaceae	Other <1%
ASV 355	1.48364e-05	UIC110	chow LM485	Fungi	Basidiomycota	Agaricomycetes	Corticiales	Corticiaceae	Other <1%
ASV 386	1.48364e-05	UIC110	chow LM485	Fungi	Basidiomycota	Agaricomycetes	Russulales	Peniophoraceae	Other <1%
ASV 472	1.48364e-05	UIC110	chow LM485	Fungi	Basidiomycota	Tremellomycetes	Filobasidiales	Piskurozymaceae	Other <1%
ASV 840	1.48364e-05	UIC110	chow LM485	Fungi	Basidiomycota	Tremellomycetes	Tremellales	Rhynchogastremataceae	Other <1%
ASV 8	0.469899	UIC111	purified 50ppm iron	Fungi	Ascomycota	Dothideomycetes	Pleosporales	Didymellaceae	Ascochyta
ASV 375	0.281158	UIC111	purified 50ppm iron	Fungi	Basidiomycota	Agaricomycetes	Agaricales	Tricholomataceae	Mycena
ASV 106	0.186137	UIC111	purified 50ppm iron	Fungi	Basidiomycota	p__Basidiomycota	p__Basidiomycota	p__Basidiomycota	p__Basidiomycota
ASV 465	0.0221282	UIC111	purified 50ppm iron	Fungi	Mucoromycota	Mucoromycetes	Mucorales	Mucoraceae	Mucor
ASV 27	0.0195249	UIC111	purified 50ppm iron	Fungi	Ascomycota	Dothideomycetes	Dothideales	Aureobasidiaceae	Aureobasidium
ASV 2	0.00618288	UIC111	purified 50ppm iron	Fungi	Ascomycota	Eurotiomycetes	Eurotiales	Aspergillaceae	Other <1%
ASV 3	0.0022779	UIC111	purified 50ppm iron	Fungi	Ascomycota	Dothideomycetes	Capnodiales	Cladosporiaceae	Other <1%
ASV 41	0.00195249	UIC111	purified 50ppm iron	Fungi	Ascomycota	Sordariomycetes	Hypocreales	Nectriaceae	Other <1%
ASV 14	0.00162707	UIC111	purified 50ppm iron	Fungi	Ascomycota	Eurotiomycetes	Eurotiales	Aspergillaceae	Other <1%
ASV 113	0.00065083	UIC111	purified 50ppm iron	Fungi	Ascomycota	Dothideomycetes	Pleosporales	o__Pleosporales	Other <1%
ASV 155	0.00065083	UIC111	purified 50ppm iron	Fungi	Mucoromycota	Mucoromycetes	Mucorales	Lichtheimiaceae	Other <1%
ASV 169	0.00065083	UIC111	purified 50ppm iron	Fungi	Basidiomycota	Tremellomycetes	Tremellales	Bulleribasidiaceae	Other <1%
ASV 25	0.00065083	UIC111	purified 50ppm iron	Fungi	Basidiomycota	Wallemiomycetes	Wallemiales	Wallemiaceae	Other <1%
ASV 33	0.00065083	UIC111	purified 50ppm iron	Fungi	Basidiomycota	Microbotryomycetes	Sporidiobolales	Sporidiobolaceae	Other <1%
ASV 6	0.00065083	UIC111	purified 50ppm iron	Fungi	Ascomycota	Dothideomycetes	Pleosporales	Pleosporaceae	Other <1%
ASV 7	0.00065083	UIC111	purified 50ppm iron	Fungi	Ascomycota	Eurotiomycetes	Eurotiales	Trichocomaceae	Other <1%
ASV 94	0.00065083	UIC111	purified 50ppm iron	Fungi	Basidiomycota	Agaricomycetes	c__Agaricomycetes	c__Agaricomycetes	Other <1%
ASV 12	0.000325415	UIC111	purified 50ppm iron	Fungi	Ascomycota	Sordariomycetes	Diaporthales	Diaporthaceae	Other <1%
ASV 122	0.000325415	UIC111	purified 50ppm iron	Fungi	Basidiomycota	Microbotryomycetes	Sporidiobolales	Sporidiobolaceae	Other <1%
ASV 18	0.000325415	UIC111	purified 50ppm iron	Fungi	Basidiomycota	Tremellomycetes	Tremellales	Bulleribasidiaceae	Other <1%
ASV 28	0.000325415	UIC111	purified 50ppm iron	Fungi	Ascomycota	Leotiomycetes	Helotiales	Myxotrichaceae	Other <1%
ASV 280	0.000325415	UIC111	purified 50ppm iron	Fungi	Basidiomycota	Agaricomycetes	Polyporales	Polyporaceae	Other <1%
ASV 36	0.000325415	UIC111	purified 50ppm iron	Fungi	Ascomycota	Sordariomycetes	Hypocreales	Hypocreaceae	Other <1%
ASV 38	0.000325415	UIC111	purified 50ppm iron	Fungi	Ascomycota	Dothideomycetes	Capnodiales	Teratosphaeriaceae	Other <1%
ASV 53	0.000325415	UIC111	purified 50ppm iron	Fungi	Basidiomycota	Tremellomycetes	Filobasidiales	Filobasidiaceae	Other <1%
ASV 596	0.000325415	UIC111	purified 50ppm iron	Fungi	Basidiomycota	Microbotryomycetes	Leucosporidiales	Leucosporidiaceae	Other <1%
ASV 74	0.000325415	UIC111	purified 50ppm iron	Fungi	Basidiomycota	Ustilaginomycetes	Ustilaginales	Ustilaginaceae	Other <1%
ASV 768	0.000325415	UIC111	purified 50ppm iron	Fungi	Basidiomycota	Tremellomycetes	Tremellales	Tremellaceae	Other <1%
ASV 840	0.000325415	UIC111	purified 50ppm iron	Fungi	Basidiomycota	Tremellomycetes	Tremellales	Rhynchogastremataceae	Other <1%
ASV 26	0.227862	UIC111	chow LM485	Fungi	Basidiomycota	Tremellomycetes	Cystofilobasidiales	Cystofilobasidiaceae	Cystofilobasidium
ASV 30	0.220563	UIC111	chow LM485	Fungi	Basidiomycota	Microbotryomycetes	Sporidiobolales	Sporidiobolaceae	Rhodosporidiobolus
ASV 2	0.128034	UIC111	chow LM485	Fungi	Ascomycota	Eurotiomycetes	Eurotiales	Aspergillaceae	Aspergillus
ASV 75	0.0642032	UIC111	chow LM485	Fungi	Basidiomycota	Tremellomycetes	Filobasidiales	Filobasidiaceae	Naganishia
ASV 3	0.0637972	UIC111	chow LM485	Fungi	Ascomycota	Dothideomycetes	Capnodiales	Cladosporiaceae	Cladosporium
ASV 14	0.0413164	UIC111	chow LM485	Fungi	Ascomycota	Eurotiomycetes	Eurotiales	Aspergillaceae	Penicillium
ASV 53	0.0343979	UIC111	chow LM485	Fungi	Basidiomycota	Tremellomycetes	Filobasidiales	Filobasidiaceae	Filobasidium
ASV 8	0.0189793	UIC111	chow LM485	Fungi	Ascomycota	Dothideomycetes	Pleosporales	Didymellaceae	Ascochyta
ASV 7	0.0189032	UIC111	chow LM485	Fungi	Ascomycota	Eurotiomycetes	Eurotiales	Trichocomaceae	Talaromyces
ASV 9	0.0171355	UIC111	chow LM485	Fungi	Ascomycota	Dothideomycetes	Capnodiales	Mycosphaerellaceae	Mycosphaerella
ASV 6	0.0164081	UIC111	chow LM485	Fungi	Ascomycota	Dothideomycetes	Pleosporales	Pleosporaceae	Alternaria
ASV 18	0.0151479	UIC111	chow LM485	Fungi	Basidiomycota	Tremellomycetes	Tremellales	Bulleribasidiaceae	Vishniacozyma
ASV 122	0.00981951	UIC111	chow LM485	Fungi	Basidiomycota	Microbotryomycetes	Sporidiobolales	Sporidiobolaceae	Other <1%
ASV 33	0.00940508	UIC111	chow LM485	Fungi	Basidiomycota	Microbotryomycetes	Sporidiobolales	Sporidiobolaceae	Other <1%
ASV 62	0.00734983	UIC111	chow LM485	Fungi	Basidiomycota	Ustilaginomycetes	Ustilaginales	Ustilaginaceae	Other <1%
ASV 155	0.00611499	UIC111	chow LM485	Fungi	Mucoromycota	Mucoromycetes	Mucorales	Lichtheimiaceae	Other <1%
ASV 94	0.00559907	UIC111	chow LM485	Fungi	Basidiomycota	Agaricomycetes	c__Agaricomycetes	c__Agaricomycetes	Other <1%
ASV 470	0.00500702	UIC111	chow LM485	Fungi	Ascomycota	Dothideomycetes	Capnodiales	Teratosphaeriaceae	Other <1%
ASV 472	0.00493936	UIC111	chow LM485	Fungi	Basidiomycota	Tremellomycetes	Filobasidiales	Piskurozymaceae	Other <1%
ASV 114	0.00479557	UIC111	chow LM485	Fungi	Basidiomycota	Agaricomycetes	Phallales	Phallaceae	Other <1%
ASV 74	0.00464333	UIC111	chow LM485	Fungi	Basidiomycota	Ustilaginomycetes	Ustilaginales	Ustilaginaceae	Other <1%
ASV 491	0.00449109	UIC111	chow LM485	Fungi	Basidiomycota	Tremellomycetes	Tremellales	Tremellaceae	Other <1%
ASV 17	0.0044488	UIC111	chow LM485	Fungi	Ascomycota	Sordariomycetes	Microascales	Microascaceae	Other <1%
ASV 120	0.00413587	UIC111	chow LM485	Fungi	Ascomycota	Sordariomycetes	Trichosphaeriales	Trichosphaeriaceae	Other <1%
ASV 31	0.00383139	UIC111	chow LM485	Fungi	Ascomycota	Dothideomycetes	Pleosporales	Didymellaceae	Other <1%
ASV 111	0.00374681	UIC111	chow LM485	Fungi	Basidiomycota	Ustilaginomycetes	Ustilaginales	Ustilaginaceae	Other <1%
ASV 169	0.00356919	UIC111	chow LM485	Fungi	Basidiomycota	Tremellomycetes	Tremellales	Bulleribasidiaceae	Other <1%
ASV 544	0.00355228	UIC111	chow LM485	Fungi	Basidiomycota	Microbotryomycetes	Microbotryomycetes_ord_Incertae_sedis	Microbotryomycetes_fam_Incertae_sedis	Other <1%
ASV 596	0.00312093	UIC111	chow LM485	Fungi	Basidiomycota	Microbotryomycetes	Leucosporidiales	Leucosporidiaceae	Other <1%
ASV 256	0.00306173	UIC111	chow LM485	Fungi	Ascomycota	Eurotiomycetes	Eurotiales	Thermoascaceae	Other <1%
ASV 264	0.00296023	UIC111	chow LM485	Fungi	Ascomycota	Sordariomycetes	Hypocreales	Clavicipitaceae	Other <1%
ASV 63	0.002605	UIC111	chow LM485	Fungi	Ascomycota	Sordariomycetes	Hypocreales	Hypocreales_fam_Incertae_sedis	Other <1%
ASV 630	0.0025458	UIC111	chow LM485	Fungi	Ascomycota	Dothideomycetes	Pleosporales	Sporormiaceae	Other <1%
ASV 25	0.00244431	UIC111	chow LM485	Fungi	Basidiomycota	Wallemiomycetes	Wallemiales	Wallemiaceae	Other <1%
ASV 36	0.00228361	UIC111	chow LM485	Fungi	Ascomycota	Sordariomycetes	Hypocreales	Hypocreaceae	Other <1%
ASV 679	0.00215674	UIC111	chow LM485	Fungi	Basidiomycota	Agaricomycetes	Trechisporales	Hydnodontaceae	Other <1%
ASV 84	0.00213982	UIC111	chow LM485	Fungi	Basidiomycota	Cystobasidiomycetes	Cystobasidiomycetes_ord_Incertae_sedis	Symmetrosporaceae	Other <1%
ASV 41	0.00188609	UIC111	chow LM485	Fungi	Ascomycota	Sordariomycetes	Hypocreales	Nectriaceae	Other <1%
ASV 743	0.00179305	UIC111	chow LM485	Fungi	Basidiomycota	Tremellomycetes	Tremellales	Cryptococcaceae	Other <1%
ASV 840	0.00175922	UIC111	chow LM485	Fungi	Basidiomycota	Tremellomycetes	Tremellales	Rhynchogastremataceae	Other <1%
ASV 443	0.00172539	UIC111	chow LM485	Fungi	Basidiomycota	Tremellomycetes	Cystofilobasidiales	Mrakiaceae	Other <1%
ASV 314	0.00170848	UIC111	chow LM485	Fungi	Ascomycota	Sordariomycetes	Microascales	Microascaceae	Other <1%
ASV 465	0.00166619	UIC111	chow LM485	Fungi	Mucoromycota	Mucoromycetes	Mucorales	Mucoraceae	Other <1%
ASV 633	0.00166619	UIC111	chow LM485	Fungi	Ascomycota	Sordariomycetes	Hypocreales	Hypocreales_fam_Incertae_sedis	Other <1%
ASV 28	0.00155624	UIC111	chow LM485	Fungi	Ascomycota	Leotiomycetes	Helotiales	Myxotrichaceae	Other <1%
ASV 357	0.00149703	UIC111	chow LM485	Fungi	Ascomycota	Dothideomycetes	Pleosporales	Phaeosphaeriaceae	Other <1%
ASV 113	0.00142937	UIC111	chow LM485	Fungi	Ascomycota	Dothideomycetes	Pleosporales	o__Pleosporales	Other <1%
ASV 834	0.00133633	UIC111	chow LM485	Fungi	Ascomycota	p__Ascomycota	p__Ascomycota	p__Ascomycota	Other <1%
ASV 483	0.00115026	UIC111	chow LM485	Fungi	Ascomycota	Saccharomycetes	Saccharomycetales	Saccharomycetales_fam_Incertae_sedis	Other <1%
ASV 886	0.00109106	UIC111	chow LM485	Fungi	Ascomycota	Dothideomycetes	Pleosporales	Phaeosphaeriaceae	Other <1%
ASV 110	0.00103185	UIC111	chow LM485	Fungi	Ascomycota	Dothideomycetes	Pleosporales	Phaeosphaeriaceae	Other <1%
ASV 563	0.000625877	UIC111	chow LM485	Fungi	Ascomycota	Saccharomycetes	Saccharomycetales	Dipodascaceae	Other <1%
ASV 1014	0.000524384	UIC111	chow LM485	Fungi	Basidiomycota	Tremellomycetes	Tremellales	Cryptococcaceae	Other <1%
ASV 1062	0.000380601	UIC111	chow LM485	Fungi	Ascomycota	Saccharomycetes	Saccharomycetales	Dipodascaceae	Other <1%
ASV 446	0.000372143	UIC111	chow LM485	Fungi	Ascomycota	Sordariomycetes	Microascales	Microascaceae	Other <1%
ASV 1069	0.000363686	UIC111	chow LM485	Fungi	Ascomycota	Sordariomycetes	Hypocreales	Nectriaceae	Other <1%
ASV 161	0.00027065	UIC111	chow LM485	Fungi	Basidiomycota	Tremellomycetes	Tremellales	Trimorphomycetaceae	Other <1%
ASV 192	0.000186072	UIC111	chow LM485	Fungi	Ascomycota	Sordariomycetes	Hypocreales	Bionectriaceae	Other <1%
ASV 157	0.000160698	UIC111	chow LM485	Fungi	Mucoromycota	Mucoromycetes	Mucorales	Lichtheimiaceae	Other <1%
ASV 846	0.000135325	UIC111	chow LM485	Fungi	Mucoromycota	Mucoromycetes	Mucorales	Rhizopodaceae	Other <1%
ASV 27	0.000101494	UIC111	chow LM485	Fungi	Ascomycota	Dothideomycetes	Dothideales	Aureobasidiaceae	Other <1%
ASV 38	1.69156e-05	UIC111	chow LM485	Fungi	Ascomycota	Dothideomycetes	Capnodiales	Teratosphaeriaceae	Other <1%
ASV 104	8.4578e-06	UIC111	chow LM485	Fungi	Chytridiomycota	p__Chytridiomycota	p__Chytridiomycota	p__Chytridiomycota	Other <1%
ASV 235	8.4578e-06	UIC111	chow LM485	Fungi	Ascomycota	Eurotiomycetes	Chaetothyriales	Trichomeriaceae	Other <1%
ASV 45	8.4578e-06	UIC111	chow LM485	Fungi	Chytridiomycota	Rhizophydiomycetes	Rhizophydiales	Aquamycetaceae	Other <1%
ASV 493	8.4578e-06	UIC111	chow LM485	Fungi	Basidiomycota	Tremellomycetes	Cystofilobasidiales	Mrakiaceae	Other <1%
ASV 55	8.4578e-06	UIC111	chow LM485	Fungi	Ascomycota	Dothideomycetes	Capnodiales	Mycosphaerellaceae	Other <1%
ASV 80	8.4578e-06	UIC111	chow LM485	Fungi	Basidiomycota	Malasseziomycetes	Malasseziales	Malasseziaceae	Other <1%
