# Supplementary material for: Fungal xenosiderophores from mycobiota and diet promote Salmonella colonization of the inflamed gut
Source: Research Square preprint supplement (doi:10.21203/rs.3.rs-1175303/v1), 2022-01-05
Supplement: Supplementary file 3 [file 5f05458cf23ad751a8d0cb83.xlsx]

## Sheet: Sheet1
Relative abundance ITS uninfected SPF mice fed chow LM485 (related to figure 1G)
OTU	Abundance	Mouse	Diet	Kingdom	Phylum	Class	Order	Family	Genus
ASV 2	0.322404	UIC11	chow LM485	Fungi	Ascomycota	Eurotiomycetes	Eurotiales	Aspergillaceae	Aspergillus
ASV 3	0.146247	UIC11	chow LM485	Fungi	Ascomycota	Dothideomycetes	Capnodiales	Cladosporiaceae	Cladosporium
ASV 23	0.0769222	UIC11	chow LM485	Fungi	Basidiomycota	Tremellomycetes	Tremellales	Bulleribasidiaceae	Vishniacozyma
ASV 8	0.0755612	UIC11	chow LM485	Fungi	Ascomycota	Dothideomycetes	Pleosporales	Didymellaceae	Ascochyta
ASV 16	0.0608572	UIC11	chow LM485	Fungi	Ascomycota	Eurotiomycetes	Eurotiales	Aspergillaceae	Penicillium
ASV 19	0.058414	UIC11	chow LM485	Fungi	Basidiomycota	Ustilaginomycetes	Ustilaginales	Ustilaginaceae	Ustilago
ASV 7	0.0417132	UIC11	chow LM485	Fungi	Ascomycota	Eurotiomycetes	Eurotiales	Trichocomaceae	Talaromyces
ASV 9	0.0411107	UIC11	chow LM485	Fungi	Ascomycota	Dothideomycetes	Capnodiales	Mycosphaerellaceae	Mycosphaerella
ASV 25	0.0354545	UIC11	chow LM485	Fungi	Basidiomycota	Wallemiomycetes	Wallemiales	Wallemiaceae	Wallemia
ASV 33	0.0310366	UIC11	chow LM485	Fungi	Basidiomycota	Microbotryomycetes	Sporidiobolales	Sporidiobolaceae	Sporobolomyces
ASV 66	0.0298652	UIC11	chow LM485	Fungi	Ascomycota	Eurotiomycetes	Eurotiales	Trichocomaceae	Xerochrysium
ASV 6	0.028705	UIC11	chow LM485	Fungi	Ascomycota	Dothideomycetes	Pleosporales	Pleosporaceae	Alternaria
ASV 58	0.0183855	UIC11	chow LM485	Fungi	Ascomycota	Sordariomycetes	Hypocreales	Hypocreaceae	Trichoderma
ASV 28	0.0136775	UIC11	chow LM485	Fungi	Ascomycota	Leotiomycetes	Helotiales	Myxotrichaceae	Oidiodendron
ASV 12	0.00953858	UIC11	chow LM485	Fungi	Ascomycota	Sordariomycetes	Diaporthales	Diaporthaceae	Other <1%
ASV 10	0.00615824	UIC11	chow LM485	Fungi	Ascomycota	Sordariomycetes	Hypocreales	Clavicipitaceae	Other <1%
ASV 54	0.00393815	UIC11	chow LM485	Fungi	Basidiomycota	Tremellomycetes	Tremellales	Tremellaceae	Other <1%
ASV 1	1.11562e-05	UIC11	chow LM485	Fungi	Ascomycota	Saccharomycetes	Saccharomycetales	Saccharomycetales_fam_Incertae_sedis	Other <1%
ASV 2	0.379352	UIC12	chow LM485	Fungi	Ascomycota	Eurotiomycetes	Eurotiales	Aspergillaceae	Aspergillus
ASV 82	0.15128	UIC12	chow LM485	Fungi	Ascomycota	Sordariomycetes	Hypocreales	Nectriaceae	Fusarium
ASV 3	0.0881006	UIC12	chow LM485	Fungi	Ascomycota	Dothideomycetes	Capnodiales	Cladosporiaceae	Cladosporium
ASV 16	0.0880011	UIC12	chow LM485	Fungi	Ascomycota	Eurotiomycetes	Eurotiales	Aspergillaceae	Penicillium
ASV 8	0.0542713	UIC12	chow LM485	Fungi	Ascomycota	Dothideomycetes	Pleosporales	Didymellaceae	Ascochyta
ASV 7	0.0499166	UIC12	chow LM485	Fungi	Ascomycota	Eurotiomycetes	Eurotiales	Trichocomaceae	Talaromyces
ASV 19	0.0411451	UIC12	chow LM485	Fungi	Basidiomycota	Ustilaginomycetes	Ustilaginales	Ustilaginaceae	Ustilago
ASV 23	0.0320502	UIC12	chow LM485	Fungi	Basidiomycota	Tremellomycetes	Tremellales	Bulleribasidiaceae	Vishniacozyma
ASV 28	0.0264887	UIC12	chow LM485	Fungi	Ascomycota	Leotiomycetes	Helotiales	Myxotrichaceae	Oidiodendron
ASV 9	0.0263394	UIC12	chow LM485	Fungi	Ascomycota	Dothideomycetes	Capnodiales	Mycosphaerellaceae	Mycosphaerella
ASV 33	0.0223829	UIC12	chow LM485	Fungi	Basidiomycota	Microbotryomycetes	Sporidiobolales	Sporidiobolaceae	Sporobolomyces
ASV 25	0.016896	UIC12	chow LM485	Fungi	Basidiomycota	Wallemiomycetes	Wallemiales	Wallemiaceae	Wallemia
ASV 6	0.016896	UIC12	chow LM485	Fungi	Ascomycota	Dothideomycetes	Pleosporales	Pleosporaceae	Alternaria
ASV 58	0.0067808	UIC12	chow LM485	Fungi	Ascomycota	Sordariomycetes	Hypocreales	Hypocreaceae	Other <1%
ASV 10	3.73255e-05	UIC12	chow LM485	Fungi	Ascomycota	Sordariomycetes	Hypocreales	Clavicipitaceae	Other <1%
ASV 43	3.73255e-05	UIC12	chow LM485	Fungi	Ascomycota	Dothideomycetes	Pleosporales	Didymellaceae	Other <1%
ASV 54	1.24418e-05	UIC12	chow LM485	Fungi	Basidiomycota	Tremellomycetes	Tremellales	Tremellaceae	Other <1%
ASV 66	1.24418e-05	UIC12	chow LM485	Fungi	Ascomycota	Eurotiomycetes	Eurotiales	Trichocomaceae	Other <1%
ASV 2	0.276335	UIC13	chow LM485	Fungi	Ascomycota	Eurotiomycetes	Eurotiales	Aspergillaceae	Aspergillus
ASV 43	0.172483	UIC13	chow LM485	Fungi	Ascomycota	Dothideomycetes	Pleosporales	Didymellaceae	Didymella
ASV 8	0.148691	UIC13	chow LM485	Fungi	Ascomycota	Dothideomycetes	Pleosporales	Didymellaceae	Ascochyta
ASV 3	0.123046	UIC13	chow LM485	Fungi	Ascomycota	Dothideomycetes	Capnodiales	Cladosporiaceae	Cladosporium
ASV 7	0.0629362	UIC13	chow LM485	Fungi	Ascomycota	Eurotiomycetes	Eurotiales	Trichocomaceae	Talaromyces
ASV 19	0.0396175	UIC13	chow LM485	Fungi	Basidiomycota	Ustilaginomycetes	Ustilaginales	Ustilaginaceae	Ustilago
ASV 16	0.0362766	UIC13	chow LM485	Fungi	Ascomycota	Eurotiomycetes	Eurotiales	Aspergillaceae	Penicillium
ASV 23	0.0262268	UIC13	chow LM485	Fungi	Basidiomycota	Tremellomycetes	Tremellales	Bulleribasidiaceae	Vishniacozyma
ASV 58	0.0224125	UIC13	chow LM485	Fungi	Ascomycota	Sordariomycetes	Hypocreales	Hypocreaceae	Trichoderma
ASV 9	0.0201807	UIC13	chow LM485	Fungi	Ascomycota	Dothideomycetes	Capnodiales	Mycosphaerellaceae	Mycosphaerella
ASV 6	0.0178813	UIC13	chow LM485	Fungi	Ascomycota	Dothideomycetes	Pleosporales	Pleosporaceae	Alternaria
ASV 25	0.015636	UIC13	chow LM485	Fungi	Basidiomycota	Wallemiomycetes	Wallemiales	Wallemiaceae	Wallemia
ASV 33	0.0127009	UIC13	chow LM485	Fungi	Basidiomycota	Microbotryomycetes	Sporidiobolales	Sporidiobolaceae	Sporobolomyces
ASV 54	0.0115917	UIC13	chow LM485	Fungi	Basidiomycota	Tremellomycetes	Tremellales	Tremellaceae	Bulleromyces
ASV 66	0.00638424	UIC13	chow LM485	Fungi	Ascomycota	Eurotiomycetes	Eurotiales	Trichocomaceae	Other <1%
ASV 28	0.00435535	UIC13	chow LM485	Fungi	Ascomycota	Leotiomycetes	Helotiales	Myxotrichaceae	Other <1%
ASV 82	0.00320565	UIC13	chow LM485	Fungi	Ascomycota	Sordariomycetes	Hypocreales	Nectriaceae	Other <1%
ASV 1	2.70519e-05	UIC13	chow LM485	Fungi	Ascomycota	Saccharomycetes	Saccharomycetales	Saccharomycetales_fam_Incertae_sedis	Other <1%
ASV 10	1.35259e-05	UIC13	chow LM485	Fungi	Ascomycota	Sordariomycetes	Hypocreales	Clavicipitaceae	Other <1%
ASV 2	0.316124	UIC14	chow LM485	Fungi	Ascomycota	Eurotiomycetes	Eurotiales	Aspergillaceae	Aspergillus
ASV 3	0.13599	UIC14	chow LM485	Fungi	Ascomycota	Dothideomycetes	Capnodiales	Cladosporiaceae	Cladosporium
ASV 16	0.100464	UIC14	chow LM485	Fungi	Ascomycota	Eurotiomycetes	Eurotiales	Aspergillaceae	Penicillium
ASV 8	0.0884076	UIC14	chow LM485	Fungi	Ascomycota	Dothideomycetes	Pleosporales	Didymellaceae	Ascochyta
ASV 7	0.0829382	UIC14	chow LM485	Fungi	Ascomycota	Eurotiomycetes	Eurotiales	Trichocomaceae	Talaromyces
ASV 19	0.0678678	UIC14	chow LM485	Fungi	Basidiomycota	Ustilaginomycetes	Ustilaginales	Ustilaginaceae	Ustilago
ASV 6	0.0511887	UIC14	chow LM485	Fungi	Ascomycota	Dothideomycetes	Pleosporales	Pleosporaceae	Alternaria
ASV 23	0.0481238	UIC14	chow LM485	Fungi	Basidiomycota	Tremellomycetes	Tremellales	Bulleribasidiaceae	Vishniacozyma
ASV 9	0.0286677	UIC14	chow LM485	Fungi	Ascomycota	Dothideomycetes	Capnodiales	Mycosphaerellaceae	Mycosphaerella
ASV 25	0.0226903	UIC14	chow LM485	Fungi	Basidiomycota	Wallemiomycetes	Wallemiales	Wallemiaceae	Wallemia
ASV 43	0.0202689	UIC14	chow LM485	Fungi	Ascomycota	Dothideomycetes	Pleosporales	Didymellaceae	Didymella
ASV 58	0.0144947	UIC14	chow LM485	Fungi	Ascomycota	Sordariomycetes	Hypocreales	Hypocreaceae	Trichoderma
ASV 28	0.00924546	UIC14	chow LM485	Fungi	Ascomycota	Leotiomycetes	Helotiales	Myxotrichaceae	Other <1%
ASV 54	0.00899147	UIC14	chow LM485	Fungi	Basidiomycota	Tremellomycetes	Tremellales	Tremellaceae	Other <1%
ASV 33	0.00421634	UIC14	chow LM485	Fungi	Basidiomycota	Microbotryomycetes	Sporidiobolales	Sporidiobolaceae	Other <1%
ASV 66	0.000169331	UIC14	chow LM485	Fungi	Ascomycota	Eurotiomycetes	Eurotiales	Trichocomaceae	Other <1%
ASV 82	0.000101598	UIC14	chow LM485	Fungi	Ascomycota	Sordariomycetes	Hypocreales	Nectriaceae	Other <1%
ASV 10	3.38662e-05	UIC14	chow LM485	Fungi	Ascomycota	Sordariomycetes	Hypocreales	Clavicipitaceae	Other <1%
ASV 1	1.69331e-05	UIC14	chow LM485	Fungi	Ascomycota	Saccharomycetes	Saccharomycetales	Saccharomycetales_fam_Incertae_sedis	Other <1%
ASV 10	0.453471	UIC15	chow LM485	Fungi	Ascomycota	Sordariomycetes	Hypocreales	Clavicipitaceae	Claviceps
ASV 2	0.25061	UIC15	chow LM485	Fungi	Ascomycota	Eurotiomycetes	Eurotiales	Aspergillaceae	Aspergillus
ASV 3	0.0596306	UIC15	chow LM485	Fungi	Ascomycota	Dothideomycetes	Capnodiales	Cladosporiaceae	Cladosporium
ASV 25	0.0326555	UIC15	chow LM485	Fungi	Basidiomycota	Wallemiomycetes	Wallemiales	Wallemiaceae	Wallemia
ASV 19	0.0309326	UIC15	chow LM485	Fungi	Basidiomycota	Ustilaginomycetes	Ustilaginales	Ustilaginaceae	Ustilago
ASV 23	0.0287071	UIC15	chow LM485	Fungi	Basidiomycota	Tremellomycetes	Tremellales	Bulleribasidiaceae	Vishniacozyma
ASV 6	0.024292	UIC15	chow LM485	Fungi	Ascomycota	Dothideomycetes	Pleosporales	Pleosporaceae	Alternaria
ASV 8	0.0224972	UIC15	chow LM485	Fungi	Ascomycota	Dothideomycetes	Pleosporales	Didymellaceae	Ascochyta
ASV 16	0.0219139	UIC15	chow LM485	Fungi	Ascomycota	Eurotiomycetes	Eurotiales	Aspergillaceae	Penicillium
ASV 7	0.0215281	UIC15	chow LM485	Fungi	Ascomycota	Eurotiomycetes	Eurotiales	Trichocomaceae	Talaromyces
ASV 9	0.0170501	UIC15	chow LM485	Fungi	Ascomycota	Dothideomycetes	Capnodiales	Mycosphaerellaceae	Mycosphaerella
ASV 54	0.0148247	UIC15	chow LM485	Fungi	Basidiomycota	Tremellomycetes	Tremellales	Tremellaceae	Bulleromyces
ASV 28	0.0094045	UIC15	chow LM485	Fungi	Ascomycota	Leotiomycetes	Helotiales	Myxotrichaceae	Other <1%
ASV 66	0.00691877	UIC15	chow LM485	Fungi	Ascomycota	Eurotiomycetes	Eurotiales	Trichocomaceae	Other <1%
ASV 58	0.00303313	UIC15	chow LM485	Fungi	Ascomycota	Sordariomycetes	Hypocreales	Hypocreaceae	Other <1%
ASV 33	0.0014717	UIC15	chow LM485	Fungi	Basidiomycota	Microbotryomycetes	Sporidiobolales	Sporidiobolaceae	Other <1%
ASV 12	0.00104993	UIC15	chow LM485	Fungi	Ascomycota	Sordariomycetes	Diaporthales	Diaporthaceae	Other <1%
ASV 43	8.97376e-06	UIC15	chow LM485	Fungi	Ascomycota	Dothideomycetes	Pleosporales	Didymellaceae	Other <1%
ASV 2	0.406263	UIC16	chow LM485	Fungi	Ascomycota	Eurotiomycetes	Eurotiales	Aspergillaceae	Aspergillus
ASV 7	0.110735	UIC16	chow LM485	Fungi	Ascomycota	Eurotiomycetes	Eurotiales	Trichocomaceae	Talaromyces
ASV 3	0.106013	UIC16	chow LM485	Fungi	Ascomycota	Dothideomycetes	Capnodiales	Cladosporiaceae	Cladosporium
ASV 8	0.0813042	UIC16	chow LM485	Fungi	Ascomycota	Dothideomycetes	Pleosporales	Didymellaceae	Ascochyta
ASV 12	0.0662412	UIC16	chow LM485	Fungi	Ascomycota	Sordariomycetes	Diaporthales	Diaporthaceae	Stenocarpella
ASV 19	0.0413307	UIC16	chow LM485	Fungi	Basidiomycota	Ustilaginomycetes	Ustilaginales	Ustilaginaceae	Ustilago
ASV 16	0.0375733	UIC16	chow LM485	Fungi	Ascomycota	Eurotiomycetes	Eurotiales	Aspergillaceae	Penicillium
ASV 25	0.0352404	UIC16	chow LM485	Fungi	Basidiomycota	Wallemiomycetes	Wallemiales	Wallemiaceae	Wallemia
ASV 9	0.0351843	UIC16	chow LM485	Fungi	Ascomycota	Dothideomycetes	Capnodiales	Mycosphaerellaceae	Mycosphaerella
ASV 23	0.0262789	UIC16	chow LM485	Fungi	Basidiomycota	Tremellomycetes	Tremellales	Bulleribasidiaceae	Vishniacozyma
ASV 6	0.0193699	UIC16	chow LM485	Fungi	Ascomycota	Dothideomycetes	Pleosporales	Pleosporaceae	Alternaria
ASV 63	0.0144237	UIC16	chow LM485	Fungi	Ascomycota	Sordariomycetes	Hypocreales	Hypocreales_fam_Incertae_sedis	Sarocladium
ASV 58	0.00634821	UIC16	chow LM485	Fungi	Ascomycota	Sordariomycetes	Hypocreales	Hypocreaceae	Other <1%
ASV 33	0.00464339	UIC16	chow LM485	Fungi	Basidiomycota	Microbotryomycetes	Sporidiobolales	Sporidiobolaceae	Other <1%
ASV 28	0.0031741	UIC16	chow LM485	Fungi	Ascomycota	Leotiomycetes	Helotiales	Myxotrichaceae	Other <1%
ASV 54	0.00308438	UIC16	chow LM485	Fungi	Basidiomycota	Tremellomycetes	Tremellales	Tremellaceae	Other <1%
ASV 66	0.00273668	UIC16	chow LM485	Fungi	Ascomycota	Eurotiomycetes	Eurotiales	Trichocomaceae	Other <1%
ASV 1	5.60796e-05	UIC16	chow LM485	Fungi	Ascomycota	Saccharomycetes	Saccharomycetales	Saccharomycetales_fam_Incertae_sedis	Other <1%
