# Supplementary material for: Fungal xenosiderophores from mycobiota and diet promote Salmonella colonization of the inflamed gut
Source: Research Square preprint supplement (doi:10.21203/rs.3.rs-1175303/v1), 2022-01-05
Supplement: Supplementary file 4 [file d26520f793ef3be2409b38d0.xlsx]

## Sheet: Sheet1
Relative abundance 16S mice fed chow LM485 to purified 50ppm iron (related to figure 2C)
OTU	Abundance	Mouse	Diet	Kingdom	Phylum	Class	Order	Family	Genus
ASV 3	0.159042	UIC107	purified 50ppm iron	Bacteria	Firmicutes	Bacilli	Erysipelotrichales	Erysipelotrichaceae	Turicibacter
ASV 4	0.134119	UIC107	purified 50ppm iron	Bacteria	Bacteroidota	Bacteroidia	Bacteroidales	Muribaculaceae	f__ Muribaculaceae
ASV 1	0.127481	UIC107	purified 50ppm iron	Bacteria	Firmicutes	Bacilli	Lactobacillales	Lactobacillaceae	Lactobacillus
ASV 25	0.109585	UIC107	purified 50ppm iron	Bacteria	Firmicutes	Clostridia	Lachnospirales	Lachnospiraceae	f__ Lachnospiraceae
ASV 8	0.0961151	UIC107	purified 50ppm iron	Bacteria	Verrucomicrobiota	Verrucomicrobiae	Verrucomicrobiales	Akkermansiaceae	Akkermansia
ASV 6	0.0745754	UIC107	purified 50ppm iron	Bacteria	Firmicutes	Bacilli	Lactobacillales	Streptococcaceae	Lactococcus
ASV 7	0.0590226	UIC107	purified 50ppm iron	Bacteria	Bacteroidota	Bacteroidia	Bacteroidales	Bacteroidaceae	Bacteroides
ASV 15	0.0378083	UIC107	purified 50ppm iron	Bacteria	Proteobacteria	Gammaproteobacteria	Burkholderiales	Sutterellaceae	Parasutterella
ASV 10	0.0291534	UIC107	purified 50ppm iron	Bacteria	Firmicutes	Clostridia	Peptostreptococcales-Tissierellales	Peptostreptococcaceae	Romboutsia
ASV 28	0.0238173	UIC107	purified 50ppm iron	Bacteria	Firmicutes	Bacilli	Erysipelotrichales	Erysipelatoclostridiaceae	Erysipelatoclostridium
ASV 52	0.0222555	UIC107	purified 50ppm iron	Bacteria	Firmicutes	Clostridia	Lachnospirales	Lachnospiraceae	Blautia
ASV 56	0.017505	UIC107	purified 50ppm iron	Bacteria	Firmicutes	Clostridia	Lachnospirales	Lachnospiraceae	Marvinbryantia
ASV 32	0.0137958	UIC107	purified 50ppm iron	Bacteria	Firmicutes	Clostridia	Clostridiales	Clostridiaceae	Clostridium sensu stricto 1
ASV 94	0.0131451	UIC107	purified 50ppm iron	Bacteria	Firmicutes	Clostridia	Oscillospirales	Oscillospiraceae	f__ Oscillospiraceae
ASV 39	0.0120388	UIC107	purified 50ppm iron	Bacteria	Firmicutes	Clostridia	Oscillospirales	[Eubacterium] coprostanoligenes group	f__ [Eubacterium] coprostanoligenes group
ASV 240	0.0109325	UIC107	purified 50ppm iron	Bacteria	Firmicutes	Clostridia	Lachnospirales	Lachnospiraceae	Lachnoclostridium
ASV 295	0.00780894	UIC107	purified 50ppm iron	Bacteria	Firmicutes	Clostridia	Oscillospirales	Ruminococcaceae	Other <1%
ASV 92	0.00709312	UIC107	purified 50ppm iron	Bacteria	Firmicutes	Clostridia	Lachnospirales	Lachnospiraceae	Other <1%
ASV 142	0.00566148	UIC107	purified 50ppm iron	Bacteria	Firmicutes	Clostridia	Oscillospirales	Oscillospiraceae	Other <1%
ASV 84	0.00553133	UIC107	purified 50ppm iron	Bacteria	Firmicutes	Bacilli	Erysipelotrichales	Erysipelotrichaceae	Other <1%
ASV 129	0.00468536	UIC107	purified 50ppm iron	Bacteria	Firmicutes	Clostridia	Oscillospirales	Oscillospiraceae	Other <1%
ASV 155	0.00351402	UIC107	purified 50ppm iron	Bacteria	Firmicutes	Clostridia	Lachnospirales	Lachnospiraceae	Other <1%
ASV 85	0.00338387	UIC107	purified 50ppm iron	Bacteria	Firmicutes	Clostridia	Oscillospirales	Oscillospiraceae	Other <1%
ASV 73	0.00266805	UIC107	purified 50ppm iron	Bacteria	Actinobacteriota	Coriobacteriia	Coriobacteriales	Eggerthellaceae	Other <1%
ASV 44	0.00208238	UIC107	purified 50ppm iron	Bacteria	Actinobacteriota	Coriobacteriia	Coriobacteriales	Eggerthellaceae	Other <1%
ASV 627	0.00156179	UIC107	purified 50ppm iron	Bacteria	Firmicutes	Clostridia	Lachnospirales	Lachnospiraceae	Other <1%
ASV 71	0.00156179	UIC107	purified 50ppm iron	Bacteria	Firmicutes	Clostridia	Clostridia UCG-014	o__ Clostridia UCG-014	Other <1%
ASV 174	0.00136656	UIC107	purified 50ppm iron	Bacteria	Firmicutes	Clostridia	Lachnospirales	Lachnospiraceae	Other <1%
ASV 266	0.00136656	UIC107	purified 50ppm iron	Bacteria	Firmicutes	Clostridia	Lachnospirales	Lachnospiraceae	Other <1%
ASV 262	0.00130149	UIC107	purified 50ppm iron	Bacteria	Firmicutes	Clostridia	Oscillospirales	Ruminococcaceae	Other <1%
ASV 366	0.00123642	UIC107	purified 50ppm iron	Bacteria	Firmicutes	Bacilli	RF39	o__ RF39	Other <1%
ASV 328	0.00117134	UIC107	purified 50ppm iron	Bacteria	Firmicutes	Clostridia	Peptostreptococcales-Tissierellales	Peptostreptococcaceae	Other <1%
ASV 314	0.00110627	UIC107	purified 50ppm iron	Bacteria	Firmicutes	Clostridia	Oscillospirales	Ruminococcaceae	Other <1%
ASV 133	0.000845969	UIC107	purified 50ppm iron	Bacteria	Firmicutes	Clostridia	Peptostreptococcales-Tissierellales	Anaerovoracaceae	Other <1%
ASV 982	0.000520596	UIC107	purified 50ppm iron	Bacteria	Firmicutes	Clostridia	Lachnospirales	Lachnospiraceae	Other <1%
ASV 13	0.000455522	UIC107	purified 50ppm iron	Bacteria	Firmicutes	Bacilli	Lactobacillales	Enterococcaceae	Other <1%
ASV 405	0.000455522	UIC107	purified 50ppm iron	Bacteria	Firmicutes	Clostridia	Peptostreptococcales-Tissierellales	Anaerovoracaceae	Other <1%
ASV 248	0.000390447	UIC107	purified 50ppm iron	Bacteria	Actinobacteriota	Coriobacteriia	Coriobacteriales	Eggerthellaceae	Other <1%
ASV 419	0.000390447	UIC107	purified 50ppm iron	Bacteria	Firmicutes	Bacilli	Erysipelotrichales	Erysipelatoclostridiaceae	Other <1%
ASV 69	0.000390447	UIC107	purified 50ppm iron	Bacteria	Actinobacteriota	Coriobacteriia	Coriobacteriales	Eggerthellaceae	Other <1%
ASV 200	0.000325373	UIC107	purified 50ppm iron	Bacteria	Firmicutes	Clostridia	Oscillospirales	UCG-010	Other <1%
ASV 96	0.000260298	UIC107	purified 50ppm iron	Bacteria	Firmicutes	Clostridia	Lachnospirales	Lachnospiraceae	Other <1%
ASV 1016	0.000195224	UIC107	purified 50ppm iron	Bacteria	Firmicutes	Clostridia	Oscillospirales	Ruminococcaceae	Other <1%
ASV 169	0.000195224	UIC107	purified 50ppm iron	Bacteria	Firmicutes	Clostridia	Oscillospirales	Oscillospiraceae	Other <1%
ASV 37	0.000195224	UIC107	purified 50ppm iron	Bacteria	Firmicutes	Bacilli	Staphylococcales	Staphylococcaceae	Other <1%
ASV 644	0.000195224	UIC107	purified 50ppm iron	Bacteria	Firmicutes	Clostridia	Peptostreptococcales-Tissierellales	Peptostreptococcaceae	Other <1%
ASV 661	0.000195224	UIC107	purified 50ppm iron	Bacteria	Firmicutes	Clostridia	Peptostreptococcales-Tissierellales	Anaerovoracaceae	Other <1%
ASV 1032	0.000130149	UIC107	purified 50ppm iron	Bacteria	Firmicutes	Clostridia	Lachnospirales	Lachnospiraceae	Other <1%
ASV 1156	0.000130149	UIC107	purified 50ppm iron	Bacteria	Firmicutes	Clostridia	Lachnospirales	Lachnospiraceae	Other <1%
ASV 1180	0.000130149	UIC107	purified 50ppm iron	Bacteria	Firmicutes	Firmicutes	c__ Firmicutes	c__ Firmicutes	Other <1%
ASV 1301	0.000130149	UIC107	purified 50ppm iron	Bacteria	Firmicutes	Bacilli	Lactobacillales	o__ Lactobacillales	Other <1%
ASV 250	0.000130149	UIC107	purified 50ppm iron	Bacteria	Firmicutes	Clostridia	Peptococcales	Peptococcaceae	Other <1%
ASV 5	0.000130149	UIC107	purified 50ppm iron	Bacteria	Firmicutes	Bacilli	Erysipelotrichales	Erysipelotrichaceae	Other <1%
ASV 50	0.000130149	UIC107	purified 50ppm iron	Bacteria	Firmicutes	Clostridia	Monoglobales	Monoglobaceae	Other <1%
ASV 742	0.000130149	UIC107	purified 50ppm iron	Bacteria	Cyanobacteria	Cyanobacteriia	Chloroplast	Chloroplast	Other <1%
ASV 1123	6.50745e-05	UIC107	purified 50ppm iron	Bacteria	Firmicutes	Clostridia	Oscillospirales	Oscillospiraceae	Other <1%
ASV 1155	6.50745e-05	UIC107	purified 50ppm iron	Bacteria	Firmicutes	Clostridia	Lachnospirales	Lachnospiraceae	Other <1%
ASV 1356	6.50745e-05	UIC107	purified 50ppm iron	Bacteria	Actinobacteriota	Coriobacteriia	Coriobacteriales	Atopobiaceae	Other <1%
ASV 30	6.50745e-05	UIC107	purified 50ppm iron	Bacteria	Bacteroidota	Bacteroidia	Bacteroidales	Rikenellaceae	Other <1%
ASV 334	6.50745e-05	UIC107	purified 50ppm iron	Bacteria	Firmicutes	Clostridia	Lachnospirales	Lachnospiraceae	Other <1%
ASV 376	6.50745e-05	UIC107	purified 50ppm iron	Bacteria	Firmicutes	Clostridia	Lachnospirales	Lachnospiraceae	Other <1%
ASV 921	6.50745e-05	UIC107	purified 50ppm iron	Bacteria	Proteobacteria	Alphaproteobacteria	Rickettsiales	Mitochondria	Other <1%
ASV 1	0.32369	UIC107	chow LM485	Bacteria	Firmicutes	Bacilli	Lactobacillales	Lactobacillaceae	Lactobacillus
ASV 4	0.255823	UIC107	chow LM485	Bacteria	Bacteroidota	Bacteroidia	Bacteroidales	Muribaculaceae	f__ Muribaculaceae
ASV 3	0.215678	UIC107	chow LM485	Bacteria	Firmicutes	Bacilli	Erysipelotrichales	Erysipelotrichaceae	Turicibacter
ASV 37	0.0409501	UIC107	chow LM485	Bacteria	Firmicutes	Bacilli	Staphylococcales	Staphylococcaceae	Staphylococcus
ASV 71	0.0315753	UIC107	chow LM485	Bacteria	Firmicutes	Clostridia	Clostridia UCG-014	o__ Clostridia UCG-014	o__ Clostridia UCG-014
ASV 92	0.0232933	UIC107	chow LM485	Bacteria	Firmicutes	Clostridia	Lachnospirales	Lachnospiraceae	Lachnospiraceae NK4A136 group
ASV 32	0.0223155	UIC107	chow LM485	Bacteria	Firmicutes	Clostridia	Clostridiales	Clostridiaceae	Clostridium sensu stricto 1
ASV 25	0.014206	UIC107	chow LM485	Bacteria	Firmicutes	Clostridia	Lachnospirales	Lachnospiraceae	f__ Lachnospiraceae
ASV 7	0.012193	UIC107	chow LM485	Bacteria	Bacteroidota	Bacteroidia	Bacteroidales	Bacteroidaceae	Bacteroides
ASV 94	0.00770691	UIC107	chow LM485	Bacteria	Firmicutes	Clostridia	Oscillospirales	Oscillospiraceae	Other <1%
ASV 83	0.00575142	UIC107	chow LM485	Bacteria	Firmicutes	Clostridia	Lachnospirales	Lachnospiraceae	Other <1%
ASV 15	0.00506125	UIC107	chow LM485	Bacteria	Proteobacteria	Gammaproteobacteria	Burkholderiales	Sutterellaceae	Other <1%
ASV 142	0.00471617	UIC107	chow LM485	Bacteria	Firmicutes	Clostridia	Oscillospirales	Oscillospiraceae	Other <1%
ASV 69	0.00379594	UIC107	chow LM485	Bacteria	Actinobacteriota	Coriobacteriia	Coriobacteriales	Eggerthellaceae	Other <1%
ASV 96	0.00327831	UIC107	chow LM485	Bacteria	Firmicutes	Clostridia	Lachnospirales	Lachnospiraceae	Other <1%
ASV 56	0.00287571	UIC107	chow LM485	Bacteria	Firmicutes	Clostridia	Lachnospirales	Lachnospiraceae	Other <1%
ASV 334	0.0028182	UIC107	chow LM485	Bacteria	Firmicutes	Clostridia	Lachnospirales	Lachnospiraceae	Other <1%
ASV 366	0.00270317	UIC107	chow LM485	Bacteria	Firmicutes	Bacilli	RF39	o__ RF39	Other <1%
ASV 240	0.00212803	UIC107	chow LM485	Bacteria	Firmicutes	Clostridia	Lachnospirales	Lachnospiraceae	Other <1%
ASV 129	0.00172543	UIC107	chow LM485	Bacteria	Firmicutes	Clostridia	Oscillospirales	Oscillospiraceae	Other <1%
ASV 84	0.00166791	UIC107	chow LM485	Bacteria	Firmicutes	Bacilli	Erysipelotrichales	Erysipelotrichaceae	Other <1%
ASV 155	0.00143786	UIC107	chow LM485	Bacteria	Firmicutes	Clostridia	Lachnospirales	Lachnospiraceae	Other <1%
ASV 266	0.00138034	UIC107	chow LM485	Bacteria	Firmicutes	Clostridia	Lachnospirales	Lachnospiraceae	Other <1%
ASV 200	0.00115028	UIC107	chow LM485	Bacteria	Firmicutes	Clostridia	Oscillospirales	UCG-010	Other <1%
ASV 248	0.00103526	UIC107	chow LM485	Bacteria	Actinobacteriota	Coriobacteriia	Coriobacteriales	Eggerthellaceae	Other <1%
ASV 324	0.00103526	UIC107	chow LM485	Bacteria	Firmicutes	Clostridia	Clostridia vadinBB60 group	o__ Clostridia vadinBB60 group	Other <1%
ASV 73	0.00103526	UIC107	chow LM485	Bacteria	Actinobacteriota	Coriobacteriia	Coriobacteriales	Eggerthellaceae	Other <1%
ASV 295	0.000977742	UIC107	chow LM485	Bacteria	Firmicutes	Clostridia	Oscillospirales	Ruminococcaceae	Other <1%
ASV 50	0.000920228	UIC107	chow LM485	Bacteria	Firmicutes	Clostridia	Monoglobales	Monoglobaceae	Other <1%
ASV 388	0.000805199	UIC107	chow LM485	Bacteria	Firmicutes	Clostridia	Oscillospirales	Ruminococcaceae	Other <1%
ASV 262	0.000747685	UIC107	chow LM485	Bacteria	Firmicutes	Clostridia	Oscillospirales	Ruminococcaceae	Other <1%
ASV 28	0.000517628	UIC107	chow LM485	Bacteria	Firmicutes	Bacilli	Erysipelotrichales	Erysipelatoclostridiaceae	Other <1%
ASV 39	0.000517628	UIC107	chow LM485	Bacteria	Firmicutes	Clostridia	Oscillospirales	[Eubacterium] coprostanoligenes group	Other <1%
ASV 1180	0.000460114	UIC107	chow LM485	Bacteria	Firmicutes	Firmicutes	c__ Firmicutes	c__ Firmicutes	Other <1%
ASV 314	0.0004026	UIC107	chow LM485	Bacteria	Firmicutes	Clostridia	Oscillospirales	Ruminococcaceae	Other <1%
ASV 376	0.000345085	UIC107	chow LM485	Bacteria	Firmicutes	Clostridia	Lachnospirales	Lachnospiraceae	Other <1%
ASV 470	0.000287571	UIC107	chow LM485	Bacteria	Firmicutes	Clostridia	Lachnospirales	Lachnospiraceae	Other <1%
ASV 663	0.000287571	UIC107	chow LM485	Bacteria	Firmicutes	Clostridia	Lachnospirales	Lachnospiraceae	Other <1%
ASV 174	0.000230057	UIC107	chow LM485	Bacteria	Firmicutes	Clostridia	Lachnospirales	Lachnospiraceae	Other <1%
ASV 10	0.000172543	UIC107	chow LM485	Bacteria	Firmicutes	Clostridia	Peptostreptococcales-Tissierellales	Peptostreptococcaceae	Other <1%
ASV 1032	0.000172543	UIC107	chow LM485	Bacteria	Firmicutes	Clostridia	Lachnospirales	Lachnospiraceae	Other <1%
ASV 169	0.000172543	UIC107	chow LM485	Bacteria	Firmicutes	Clostridia	Oscillospirales	Oscillospiraceae	Other <1%
ASV 250	0.000172543	UIC107	chow LM485	Bacteria	Firmicutes	Clostridia	Peptococcales	Peptococcaceae	Other <1%
ASV 85	0.000172543	UIC107	chow LM485	Bacteria	Firmicutes	Clostridia	Oscillospirales	Oscillospiraceae	Other <1%
ASV 1123	0.000115028	UIC107	chow LM485	Bacteria	Firmicutes	Clostridia	Oscillospirales	Oscillospiraceae	Other <1%
ASV 1275	0.000115028	UIC107	chow LM485	Bacteria	Firmicutes	Clostridia	Lachnospirales	Lachnospiraceae	Other <1%
ASV 27	0.000115028	UIC107	chow LM485	Bacteria	Actinobacteriota	Coriobacteriia	Coriobacteriales	Atopobiaceae	Other <1%
ASV 419	0.000115028	UIC107	chow LM485	Bacteria	Firmicutes	Bacilli	Erysipelotrichales	Erysipelatoclostridiaceae	Other <1%
ASV 921	0.000115028	UIC107	chow LM485	Bacteria	Proteobacteria	Alphaproteobacteria	Rickettsiales	Mitochondria	Other <1%
ASV 1141	5.75142e-05	UIC107	chow LM485	Bacteria	Firmicutes	Clostridia	Oscillospirales	Oscillospiraceae	Other <1%
ASV 1155	5.75142e-05	UIC107	chow LM485	Bacteria	Firmicutes	Clostridia	Lachnospirales	Lachnospiraceae	Other <1%
ASV 1156	5.75142e-05	UIC107	chow LM485	Bacteria	Firmicutes	Clostridia	Lachnospirales	Lachnospiraceae	Other <1%
ASV 1158	5.75142e-05	UIC107	chow LM485	Bacteria	Firmicutes	Bacilli	Erysipelotrichales	Erysipelotrichaceae	Other <1%
ASV 1160	5.75142e-05	UIC107	chow LM485	Bacteria	Firmicutes	Clostridia	c__ Clostridia	c__ Clostridia	Other <1%
ASV 1457	5.75142e-05	UIC107	chow LM485	Bacteria	Firmicutes	Bacilli	c__ Bacilli	c__ Bacilli	Other <1%
ASV 30	5.75142e-05	UIC107	chow LM485	Bacteria	Bacteroidota	Bacteroidia	Bacteroidales	Rikenellaceae	Other <1%
ASV 328	5.75142e-05	UIC107	chow LM485	Bacteria	Firmicutes	Clostridia	Peptostreptococcales-Tissierellales	Peptostreptococcaceae	Other <1%
ASV 405	5.75142e-05	UIC107	chow LM485	Bacteria	Firmicutes	Clostridia	Peptostreptococcales-Tissierellales	Anaerovoracaceae	Other <1%
ASV 44	5.75142e-05	UIC107	chow LM485	Bacteria	Actinobacteriota	Coriobacteriia	Coriobacteriales	Eggerthellaceae	Other <1%
ASV 52	5.75142e-05	UIC107	chow LM485	Bacteria	Firmicutes	Clostridia	Lachnospirales	Lachnospiraceae	Other <1%
ASV 608	5.75142e-05	UIC107	chow LM485	Bacteria	Firmicutes	Clostridia	Oscillospirales	Butyricicoccaceae	Other <1%
ASV 627	5.75142e-05	UIC107	chow LM485	Bacteria	Firmicutes	Clostridia	Lachnospirales	Lachnospiraceae	Other <1%
ASV 661	5.75142e-05	UIC107	chow LM485	Bacteria	Firmicutes	Clostridia	Peptostreptococcales-Tissierellales	Anaerovoracaceae	Other <1%
ASV 737	5.75142e-05	UIC107	chow LM485	Bacteria	Firmicutes	Clostridia	Oscillospirales	Ruminococcaceae	Other <1%
ASV 742	5.75142e-05	UIC107	chow LM485	Bacteria	Cyanobacteria	Cyanobacteriia	Chloroplast	Chloroplast	Other <1%
ASV 8	5.75142e-05	UIC107	chow LM485	Bacteria	Verrucomicrobiota	Verrucomicrobiae	Verrucomicrobiales	Akkermansiaceae	Other <1%
ASV 982	5.75142e-05	UIC107	chow LM485	Bacteria	Firmicutes	Clostridia	Lachnospirales	Lachnospiraceae	Other <1%
ASV 1	0.311594	UIC108	purified 50ppm iron	Bacteria	Firmicutes	Bacilli	Lactobacillales	Lactobacillaceae	Lactobacillus
ASV 3	0.161795	UIC108	purified 50ppm iron	Bacteria	Firmicutes	Bacilli	Erysipelotrichales	Erysipelotrichaceae	Turicibacter
ASV 8	0.148459	UIC108	purified 50ppm iron	Bacteria	Verrucomicrobiota	Verrucomicrobiae	Verrucomicrobiales	Akkermansiaceae	Akkermansia
ASV 6	0.0682621	UIC108	purified 50ppm iron	Bacteria	Firmicutes	Bacilli	Lactobacillales	Streptococcaceae	Lactococcus
ASV 25	0.0591889	UIC108	purified 50ppm iron	Bacteria	Firmicutes	Clostridia	Lachnospirales	Lachnospiraceae	f__ Lachnospiraceae
ASV 15	0.0588844	UIC108	purified 50ppm iron	Bacteria	Proteobacteria	Gammaproteobacteria	Burkholderiales	Sutterellaceae	Parasutterella
ASV 28	0.0334308	UIC108	purified 50ppm iron	Bacteria	Firmicutes	Bacilli	Erysipelotrichales	Erysipelatoclostridiaceae	Erysipelatoclostridium
ASV 10	0.0237486	UIC108	purified 50ppm iron	Bacteria	Firmicutes	Clostridia	Peptostreptococcales-Tissierellales	Peptostreptococcaceae	Romboutsia
ASV 56	0.0187553	UIC108	purified 50ppm iron	Bacteria	Firmicutes	Clostridia	Lachnospirales	Lachnospiraceae	Marvinbryantia
ASV 52	0.0152844	UIC108	purified 50ppm iron	Bacteria	Firmicutes	Clostridia	Lachnospirales	Lachnospiraceae	Blautia
ASV 84	0.013762	UIC108	purified 50ppm iron	Bacteria	Firmicutes	Bacilli	Erysipelotrichales	Erysipelotrichaceae	f__ Erysipelotrichaceae
ASV 4	0.00949945	UIC108	purified 50ppm iron	Bacteria	Bacteroidota	Bacteroidia	Bacteroidales	Muribaculaceae	Other <1%
ASV 39	0.00913409	UIC108	purified 50ppm iron	Bacteria	Firmicutes	Clostridia	Oscillospirales	[Eubacterium] coprostanoligenes group	Other <1%
ASV 7	0.00882962	UIC108	purified 50ppm iron	Bacteria	Bacteroidota	Bacteroidia	Bacteroidales	Bacteroidaceae	Other <1%
ASV 32	0.008038	UIC108	purified 50ppm iron	Bacteria	Firmicutes	Clostridia	Clostridiales	Clostridiaceae	Other <1%
ASV 142	0.00560224	UIC108	purified 50ppm iron	Bacteria	Firmicutes	Clostridia	Oscillospirales	Oscillospiraceae	Other <1%
ASV 169	0.00548045	UIC108	purified 50ppm iron	Bacteria	Firmicutes	Clostridia	Oscillospirales	Oscillospiraceae	Other <1%
ASV 92	0.00487151	UIC108	purified 50ppm iron	Bacteria	Firmicutes	Clostridia	Lachnospirales	Lachnospiraceae	Other <1%
ASV 240	0.00474973	UIC108	purified 50ppm iron	Bacteria	Firmicutes	Clostridia	Lachnospirales	Lachnospiraceae	Other <1%
ASV 129	0.00353185	UIC108	purified 50ppm iron	Bacteria	Firmicutes	Clostridia	Oscillospirales	Oscillospiraceae	Other <1%
ASV 155	0.00280112	UIC108	purified 50ppm iron	Bacteria	Firmicutes	Clostridia	Lachnospirales	Lachnospiraceae	Other <1%
ASV 73	0.00243576	UIC108	purified 50ppm iron	Bacteria	Actinobacteriota	Coriobacteriia	Coriobacteriales	Eggerthellaceae	Other <1%
ASV 94	0.00237486	UIC108	purified 50ppm iron	Bacteria	Firmicutes	Clostridia	Oscillospirales	Oscillospiraceae	Other <1%
ASV 174	0.00231397	UIC108	purified 50ppm iron	Bacteria	Firmicutes	Clostridia	Lachnospirales	Lachnospiraceae	Other <1%
ASV 85	0.00188771	UIC108	purified 50ppm iron	Bacteria	Firmicutes	Clostridia	Oscillospirales	Oscillospiraceae	Other <1%
ASV 200	0.00152235	UIC108	purified 50ppm iron	Bacteria	Firmicutes	Clostridia	Oscillospirales	UCG-010	Other <1%
ASV 419	0.00133967	UIC108	purified 50ppm iron	Bacteria	Firmicutes	Bacilli	Erysipelotrichales	Erysipelatoclostridiaceae	Other <1%
ASV 295	0.00121788	UIC108	purified 50ppm iron	Bacteria	Firmicutes	Clostridia	Oscillospirales	Ruminococcaceae	Other <1%
ASV 266	0.00115698	UIC108	purified 50ppm iron	Bacteria	Firmicutes	Clostridia	Lachnospirales	Lachnospiraceae	Other <1%
ASV 314	0.00115698	UIC108	purified 50ppm iron	Bacteria	Firmicutes	Clostridia	Oscillospirales	Ruminococcaceae	Other <1%
ASV 328	0.00109609	UIC108	purified 50ppm iron	Bacteria	Firmicutes	Clostridia	Peptostreptococcales-Tissierellales	Peptostreptococcaceae	Other <1%
ASV 250	0.0010352	UIC108	purified 50ppm iron	Bacteria	Firmicutes	Clostridia	Peptococcales	Peptococcaceae	Other <1%
ASV 44	0.000913409	UIC108	purified 50ppm iron	Bacteria	Actinobacteriota	Coriobacteriia	Coriobacteriales	Eggerthellaceae	Other <1%
ASV 71	0.000852515	UIC108	purified 50ppm iron	Bacteria	Firmicutes	Clostridia	Clostridia UCG-014	o__ Clostridia UCG-014	Other <1%
ASV 13	0.000791621	UIC108	purified 50ppm iron	Bacteria	Firmicutes	Bacilli	Lactobacillales	Enterococcaceae	Other <1%
ASV 262	0.000791621	UIC108	purified 50ppm iron	Bacteria	Firmicutes	Clostridia	Oscillospirales	Ruminococcaceae	Other <1%
ASV 366	0.000487151	UIC108	purified 50ppm iron	Bacteria	Firmicutes	Bacilli	RF39	o__ RF39	Other <1%
ASV 69	0.000365364	UIC108	purified 50ppm iron	Bacteria	Actinobacteriota	Coriobacteriia	Coriobacteriales	Eggerthellaceae	Other <1%
ASV 248	0.00030447	UIC108	purified 50ppm iron	Bacteria	Actinobacteriota	Coriobacteriia	Coriobacteriales	Eggerthellaceae	Other <1%
ASV 1156	0.000243576	UIC108	purified 50ppm iron	Bacteria	Firmicutes	Clostridia	Lachnospirales	Lachnospiraceae	Other <1%
ASV 37	0.000243576	UIC108	purified 50ppm iron	Bacteria	Firmicutes	Bacilli	Staphylococcales	Staphylococcaceae	Other <1%
ASV 1180	0.000182682	UIC108	purified 50ppm iron	Bacteria	Firmicutes	Firmicutes	c__ Firmicutes	c__ Firmicutes	Other <1%
ASV 627	0.000182682	UIC108	purified 50ppm iron	Bacteria	Firmicutes	Clostridia	Lachnospirales	Lachnospiraceae	Other <1%
ASV 1155	0.000121788	UIC108	purified 50ppm iron	Bacteria	Firmicutes	Clostridia	Lachnospirales	Lachnospiraceae	Other <1%
ASV 1160	0.000121788	UIC108	purified 50ppm iron	Bacteria	Firmicutes	Clostridia	c__ Clostridia	c__ Clostridia	Other <1%
ASV 1301	0.000121788	UIC108	purified 50ppm iron	Bacteria	Firmicutes	Bacilli	Lactobacillales	o__ Lactobacillales	Other <1%
ASV 133	0.000121788	UIC108	purified 50ppm iron	Bacteria	Firmicutes	Clostridia	Peptostreptococcales-Tissierellales	Anaerovoracaceae	Other <1%
ASV 376	0.000121788	UIC108	purified 50ppm iron	Bacteria	Firmicutes	Clostridia	Lachnospirales	Lachnospiraceae	Other <1%
ASV 644	0.000121788	UIC108	purified 50ppm iron	Bacteria	Firmicutes	Clostridia	Peptostreptococcales-Tissierellales	Peptostreptococcaceae	Other <1%
ASV 661	0.000121788	UIC108	purified 50ppm iron	Bacteria	Firmicutes	Clostridia	Peptostreptococcales-Tissierellales	Anaerovoracaceae	Other <1%
ASV 921	0.000121788	UIC108	purified 50ppm iron	Bacteria	Proteobacteria	Alphaproteobacteria	Rickettsiales	Mitochondria	Other <1%
ASV 1016	6.08939e-05	UIC108	purified 50ppm iron	Bacteria	Firmicutes	Clostridia	Oscillospirales	Ruminococcaceae	Other <1%
ASV 1123	6.08939e-05	UIC108	purified 50ppm iron	Bacteria	Firmicutes	Clostridia	Oscillospirales	Oscillospiraceae	Other <1%
ASV 1382	6.08939e-05	UIC108	purified 50ppm iron	Bacteria	Firmicutes	Bacilli	Lactobacillales	Streptococcaceae	Other <1%
ASV 1435	6.08939e-05	UIC108	purified 50ppm iron	Bacteria	Proteobacteria	Gammaproteobacteria	Burkholderiales	Comamonadaceae	Other <1%
ASV 2	6.08939e-05	UIC108	purified 50ppm iron	Bacteria	Proteobacteria	Gammaproteobacteria	Enterobacterales	Enterobacteriaceae	Other <1%
ASV 5	6.08939e-05	UIC108	purified 50ppm iron	Bacteria	Firmicutes	Bacilli	Erysipelotrichales	Erysipelotrichaceae	Other <1%
ASV 96	6.08939e-05	UIC108	purified 50ppm iron	Bacteria	Firmicutes	Clostridia	Lachnospirales	Lachnospiraceae	Other <1%
ASV 1	0.338596	UIC108	chow LM485	Bacteria	Firmicutes	Bacilli	Lactobacillales	Lactobacillaceae	Lactobacillus
ASV 4	0.249146	UIC108	chow LM485	Bacteria	Bacteroidota	Bacteroidia	Bacteroidales	Muribaculaceae	f__ Muribaculaceae
ASV 3	0.153896	UIC108	chow LM485	Bacteria	Firmicutes	Bacilli	Erysipelotrichales	Erysipelotrichaceae	Turicibacter
ASV 92	0.0608365	UIC108	chow LM485	Bacteria	Firmicutes	Clostridia	Lachnospirales	Lachnospiraceae	Lachnospiraceae NK4A136 group
ASV 25	0.0457563	UIC108	chow LM485	Bacteria	Firmicutes	Clostridia	Lachnospirales	Lachnospiraceae	f__ Lachnospiraceae
ASV 7	0.0175292	UIC108	chow LM485	Bacteria	Bacteroidota	Bacteroidia	Bacteroidales	Bacteroidaceae	Bacteroides
ASV 96	0.0172069	UIC108	chow LM485	Bacteria	Firmicutes	Clostridia	Lachnospirales	Lachnospiraceae	A2
ASV 32	0.0154669	UIC108	chow LM485	Bacteria	Firmicutes	Clostridia	Clostridiales	Clostridiaceae	Clostridium sensu stricto 1
ASV 71	0.0141136	UIC108	chow LM485	Bacteria	Firmicutes	Clostridia	Clostridia UCG-014	o__ Clostridia UCG-014	o__ Clostridia UCG-014
ASV 37	0.013598	UIC108	chow LM485	Bacteria	Firmicutes	Bacilli	Staphylococcales	Staphylococcaceae	Staphylococcus
ASV 69	0.00870014	UIC108	chow LM485	Bacteria	Actinobacteriota	Coriobacteriia	Coriobacteriales	Eggerthellaceae	Other <1%
ASV 94	0.00773345	UIC108	chow LM485	Bacteria	Firmicutes	Clostridia	Oscillospirales	Oscillospiraceae	Other <1%
ASV 334	0.00670233	UIC108	chow LM485	Bacteria	Firmicutes	Clostridia	Lachnospirales	Lachnospiraceae	Other <1%
ASV 240	0.00650899	UIC108	chow LM485	Bacteria	Firmicutes	Clostridia	Lachnospirales	Lachnospiraceae	Other <1%
ASV 388	0.00580009	UIC108	chow LM485	Bacteria	Firmicutes	Clostridia	Oscillospirales	Ruminococcaceae	Other <1%
ASV 155	0.00348005	UIC108	chow LM485	Bacteria	Firmicutes	Clostridia	Lachnospirales	Lachnospiraceae	Other <1%
ASV 142	0.00322227	UIC108	chow LM485	Bacteria	Firmicutes	Clostridia	Oscillospirales	Oscillospiraceae	Other <1%
ASV 266	0.00315783	UIC108	chow LM485	Bacteria	Firmicutes	Clostridia	Lachnospirales	Lachnospiraceae	Other <1%
ASV 129	0.00296449	UIC108	chow LM485	Bacteria	Firmicutes	Clostridia	Oscillospirales	Oscillospiraceae	Other <1%
ASV 15	0.00296449	UIC108	chow LM485	Bacteria	Proteobacteria	Gammaproteobacteria	Burkholderiales	Sutterellaceae	Other <1%
ASV 324	0.00270671	UIC108	chow LM485	Bacteria	Firmicutes	Clostridia	Clostridia vadinBB60 group	o__ Clostridia vadinBB60 group	Other <1%
ASV 295	0.00154669	UIC108	chow LM485	Bacteria	Firmicutes	Clostridia	Oscillospirales	Ruminococcaceae	Other <1%
ASV 84	0.00154669	UIC108	chow LM485	Bacteria	Firmicutes	Bacilli	Erysipelotrichales	Erysipelotrichaceae	Other <1%
ASV 366	0.00148225	UIC108	chow LM485	Bacteria	Firmicutes	Bacilli	RF39	o__ RF39	Other <1%
ASV 262	0.00116002	UIC108	chow LM485	Bacteria	Firmicutes	Clostridia	Oscillospirales	Ruminococcaceae	Other <1%
ASV 56	0.00109557	UIC108	chow LM485	Bacteria	Firmicutes	Clostridia	Lachnospirales	Lachnospiraceae	Other <1%
ASV 73	0.00109557	UIC108	chow LM485	Bacteria	Actinobacteriota	Coriobacteriia	Coriobacteriales	Eggerthellaceae	Other <1%
ASV 314	0.000966682	UIC108	chow LM485	Bacteria	Firmicutes	Clostridia	Oscillospirales	Ruminococcaceae	Other <1%
ASV 627	0.000966682	UIC108	chow LM485	Bacteria	Firmicutes	Clostridia	Lachnospirales	Lachnospiraceae	Other <1%
ASV 376	0.000902236	UIC108	chow LM485	Bacteria	Firmicutes	Clostridia	Lachnospirales	Lachnospiraceae	Other <1%
ASV 248	0.000837791	UIC108	chow LM485	Bacteria	Actinobacteriota	Coriobacteriia	Coriobacteriales	Eggerthellaceae	Other <1%
ASV 83	0.000837791	UIC108	chow LM485	Bacteria	Firmicutes	Clostridia	Lachnospirales	Lachnospiraceae	Other <1%
ASV 1141	0.000644454	UIC108	chow LM485	Bacteria	Firmicutes	Clostridia	Oscillospirales	Oscillospiraceae	Other <1%
ASV 52	0.000644454	UIC108	chow LM485	Bacteria	Firmicutes	Clostridia	Lachnospirales	Lachnospiraceae	Other <1%
ASV 50	0.000580009	UIC108	chow LM485	Bacteria	Firmicutes	Clostridia	Monoglobales	Monoglobaceae	Other <1%
ASV 169	0.000515564	UIC108	chow LM485	Bacteria	Firmicutes	Clostridia	Oscillospirales	Oscillospiraceae	Other <1%
ASV 39	0.000515564	UIC108	chow LM485	Bacteria	Firmicutes	Clostridia	Oscillospirales	[Eubacterium] coprostanoligenes group	Other <1%
ASV 1123	0.000451118	UIC108	chow LM485	Bacteria	Firmicutes	Clostridia	Oscillospirales	Oscillospiraceae	Other <1%
ASV 200	0.000451118	UIC108	chow LM485	Bacteria	Firmicutes	Clostridia	Oscillospirales	UCG-010	Other <1%
ASV 250	0.000451118	UIC108	chow LM485	Bacteria	Firmicutes	Clostridia	Peptococcales	Peptococcaceae	Other <1%
ASV 174	0.000322227	UIC108	chow LM485	Bacteria	Firmicutes	Clostridia	Lachnospirales	Lachnospiraceae	Other <1%
ASV 1180	0.000257782	UIC108	chow LM485	Bacteria	Firmicutes	Firmicutes	c__ Firmicutes	c__ Firmicutes	Other <1%
ASV 419	0.000257782	UIC108	chow LM485	Bacteria	Firmicutes	Bacilli	Erysipelotrichales	Erysipelatoclostridiaceae	Other <1%
ASV 133	0.000193336	UIC108	chow LM485	Bacteria	Firmicutes	Clostridia	Peptostreptococcales-Tissierellales	Anaerovoracaceae	Other <1%
ASV 405	0.000193336	UIC108	chow LM485	Bacteria	Firmicutes	Clostridia	Peptostreptococcales-Tissierellales	Anaerovoracaceae	Other <1%
ASV 8	0.000193336	UIC108	chow LM485	Bacteria	Verrucomicrobiota	Verrucomicrobiae	Verrucomicrobiales	Akkermansiaceae	Other <1%
ASV 982	0.000193336	UIC108	chow LM485	Bacteria	Firmicutes	Clostridia	Lachnospirales	Lachnospiraceae	Other <1%
ASV 10	0.000128891	UIC108	chow LM485	Bacteria	Firmicutes	Clostridia	Peptostreptococcales-Tissierellales	Peptostreptococcaceae	Other <1%
ASV 1032	0.000128891	UIC108	chow LM485	Bacteria	Firmicutes	Clostridia	Lachnospirales	Lachnospiraceae	Other <1%
ASV 1275	0.000128891	UIC108	chow LM485	Bacteria	Firmicutes	Clostridia	Lachnospirales	Lachnospiraceae	Other <1%
ASV 28	0.000128891	UIC108	chow LM485	Bacteria	Firmicutes	Bacilli	Erysipelotrichales	Erysipelatoclostridiaceae	Other <1%
ASV 5	0.000128891	UIC108	chow LM485	Bacteria	Firmicutes	Bacilli	Erysipelotrichales	Erysipelotrichaceae	Other <1%
ASV 742	0.000128891	UIC108	chow LM485	Bacteria	Cyanobacteria	Cyanobacteriia	Chloroplast	Chloroplast	Other <1%
ASV 1016	6.44454e-05	UIC108	chow LM485	Bacteria	Firmicutes	Clostridia	Oscillospirales	Ruminococcaceae	Other <1%
ASV 11	6.44454e-05	UIC108	chow LM485	Bacteria	Proteobacteria	Gammaproteobacteria	Enterobacterales	Enterobacteriaceae	Other <1%
ASV 1131	6.44454e-05	UIC108	chow LM485	Bacteria	Firmicutes	Bacilli	Staphylococcales	Staphylococcaceae	Other <1%
ASV 1156	6.44454e-05	UIC108	chow LM485	Bacteria	Firmicutes	Clostridia	Lachnospirales	Lachnospiraceae	Other <1%
ASV 1160	6.44454e-05	UIC108	chow LM485	Bacteria	Firmicutes	Clostridia	c__ Clostridia	c__ Clostridia	Other <1%
ASV 1320	6.44454e-05	UIC108	chow LM485	Bacteria	Cyanobacteria	Cyanobacteriia	Chloroplast	o__ Chloroplast	Other <1%
ASV 470	6.44454e-05	UIC108	chow LM485	Bacteria	Firmicutes	Clostridia	Lachnospirales	Lachnospiraceae	Other <1%
ASV 608	6.44454e-05	UIC108	chow LM485	Bacteria	Firmicutes	Clostridia	Oscillospirales	Butyricicoccaceae	Other <1%
ASV 644	6.44454e-05	UIC108	chow LM485	Bacteria	Firmicutes	Clostridia	Peptostreptococcales-Tissierellales	Peptostreptococcaceae	Other <1%
ASV 661	6.44454e-05	UIC108	chow LM485	Bacteria	Firmicutes	Clostridia	Peptostreptococcales-Tissierellales	Anaerovoracaceae	Other <1%
ASV 663	6.44454e-05	UIC108	chow LM485	Bacteria	Firmicutes	Clostridia	Lachnospirales	Lachnospiraceae	Other <1%
ASV 85	6.44454e-05	UIC108	chow LM485	Bacteria	Firmicutes	Clostridia	Oscillospirales	Oscillospiraceae	Other <1%
ASV 921	6.44454e-05	UIC108	chow LM485	Bacteria	Proteobacteria	Alphaproteobacteria	Rickettsiales	Mitochondria	Other <1%
ASV 3	0.178043	UIC109	purified 50ppm iron	Bacteria	Firmicutes	Bacilli	Erysipelotrichales	Erysipelotrichaceae	Turicibacter
ASV 8	0.166232	UIC109	purified 50ppm iron	Bacteria	Verrucomicrobiota	Verrucomicrobiae	Verrucomicrobiales	Akkermansiaceae	Akkermansia
ASV 6	0.100771	UIC109	purified 50ppm iron	Bacteria	Firmicutes	Bacilli	Lactobacillales	Streptococcaceae	Lactococcus
ASV 7	0.0928136	UIC109	purified 50ppm iron	Bacteria	Bacteroidota	Bacteroidia	Bacteroidales	Bacteroidaceae	Bacteroides
ASV 1	0.0851051	UIC109	purified 50ppm iron	Bacteria	Firmicutes	Bacilli	Lactobacillales	Lactobacillaceae	Lactobacillus
ASV 15	0.0570683	UIC109	purified 50ppm iron	Bacteria	Proteobacteria	Gammaproteobacteria	Burkholderiales	Sutterellaceae	Parasutterella
ASV 4	0.0515355	UIC109	purified 50ppm iron	Bacteria	Bacteroidota	Bacteroidia	Bacteroidales	Muribaculaceae	f__ Muribaculaceae
ASV 25	0.0507895	UIC109	purified 50ppm iron	Bacteria	Firmicutes	Clostridia	Lachnospirales	Lachnospiraceae	f__ Lachnospiraceae
ASV 10	0.040097	UIC109	purified 50ppm iron	Bacteria	Firmicutes	Clostridia	Peptostreptococcales-Tissierellales	Peptostreptococcaceae	Romboutsia
ASV 28	0.0338182	UIC109	purified 50ppm iron	Bacteria	Firmicutes	Bacilli	Erysipelotrichales	Erysipelatoclostridiaceae	Erysipelatoclostridium
ASV 32	0.0251772	UIC109	purified 50ppm iron	Bacteria	Firmicutes	Clostridia	Clostridiales	Clostridiaceae	Clostridium sensu stricto 1
ASV 56	0.0185876	UIC109	purified 50ppm iron	Bacteria	Firmicutes	Clostridia	Lachnospirales	Lachnospiraceae	Marvinbryantia
ASV 71	0.0169091	UIC109	purified 50ppm iron	Bacteria	Firmicutes	Clostridia	Clostridia UCG-014	o__ Clostridia UCG-014	o__ Clostridia UCG-014
ASV 84	0.0120602	UIC109	purified 50ppm iron	Bacteria	Firmicutes	Bacilli	Erysipelotrichales	Erysipelotrichaceae	f__ Erysipelotrichaceae
ASV 39	0.00944921	UIC109	purified 50ppm iron	Bacteria	Firmicutes	Clostridia	Oscillospirales	[Eubacterium] coprostanoligenes group	Other <1%
ASV 295	0.00658958	UIC109	purified 50ppm iron	Bacteria	Firmicutes	Clostridia	Oscillospirales	Ruminococcaceae	Other <1%
ASV 92	0.00603009	UIC109	purified 50ppm iron	Bacteria	Firmicutes	Clostridia	Lachnospirales	Lachnospiraceae	Other <1%
ASV 240	0.00571926	UIC109	purified 50ppm iron	Bacteria	Firmicutes	Clostridia	Lachnospirales	Lachnospiraceae	Other <1%
ASV 169	0.00497327	UIC109	purified 50ppm iron	Bacteria	Firmicutes	Clostridia	Oscillospirales	Oscillospiraceae	Other <1%
ASV 94	0.00484894	UIC109	purified 50ppm iron	Bacteria	Firmicutes	Clostridia	Oscillospirales	Oscillospiraceae	Other <1%
ASV 129	0.00410295	UIC109	purified 50ppm iron	Bacteria	Firmicutes	Clostridia	Oscillospirales	Oscillospiraceae	Other <1%
ASV 142	0.00323262	UIC109	purified 50ppm iron	Bacteria	Firmicutes	Clostridia	Oscillospirales	Oscillospiraceae	Other <1%
ASV 52	0.00310829	UIC109	purified 50ppm iron	Bacteria	Firmicutes	Clostridia	Lachnospirales	Lachnospiraceae	Other <1%
ASV 174	0.00279746	UIC109	purified 50ppm iron	Bacteria	Firmicutes	Clostridia	Lachnospirales	Lachnospiraceae	Other <1%
ASV 73	0.0027353	UIC109	purified 50ppm iron	Bacteria	Actinobacteriota	Coriobacteriia	Coriobacteriales	Eggerthellaceae	Other <1%
ASV 85	0.00211364	UIC109	purified 50ppm iron	Bacteria	Firmicutes	Clostridia	Oscillospirales	Oscillospiraceae	Other <1%
ASV 200	0.00198931	UIC109	purified 50ppm iron	Bacteria	Firmicutes	Clostridia	Oscillospirales	UCG-010	Other <1%
ASV 44	0.00192714	UIC109	purified 50ppm iron	Bacteria	Actinobacteriota	Coriobacteriia	Coriobacteriales	Eggerthellaceae	Other <1%
ASV 155	0.00155415	UIC109	purified 50ppm iron	Bacteria	Firmicutes	Clostridia	Lachnospirales	Lachnospiraceae	Other <1%
ASV 262	0.00124332	UIC109	purified 50ppm iron	Bacteria	Firmicutes	Clostridia	Oscillospirales	Ruminococcaceae	Other <1%
ASV 328	0.000932488	UIC109	purified 50ppm iron	Bacteria	Firmicutes	Clostridia	Peptostreptococcales-Tissierellales	Peptostreptococcaceae	Other <1%
ASV 627	0.000932488	UIC109	purified 50ppm iron	Bacteria	Firmicutes	Clostridia	Lachnospirales	Lachnospiraceae	Other <1%
ASV 37	0.000808156	UIC109	purified 50ppm iron	Bacteria	Firmicutes	Bacilli	Staphylococcales	Staphylococcaceae	Other <1%
ASV 266	0.000621659	UIC109	purified 50ppm iron	Bacteria	Firmicutes	Clostridia	Lachnospirales	Lachnospiraceae	Other <1%
ASV 314	0.000621659	UIC109	purified 50ppm iron	Bacteria	Firmicutes	Clostridia	Oscillospirales	Ruminococcaceae	Other <1%
ASV 250	0.000559493	UIC109	purified 50ppm iron	Bacteria	Firmicutes	Clostridia	Peptococcales	Peptococcaceae	Other <1%
ASV 248	0.000497327	UIC109	purified 50ppm iron	Bacteria	Actinobacteriota	Coriobacteriia	Coriobacteriales	Eggerthellaceae	Other <1%
ASV 366	0.000435161	UIC109	purified 50ppm iron	Bacteria	Firmicutes	Bacilli	RF39	o__ RF39	Other <1%
ASV 13	0.000372995	UIC109	purified 50ppm iron	Bacteria	Firmicutes	Bacilli	Lactobacillales	Enterococcaceae	Other <1%
ASV 133	0.000372995	UIC109	purified 50ppm iron	Bacteria	Firmicutes	Clostridia	Peptostreptococcales-Tissierellales	Anaerovoracaceae	Other <1%
ASV 644	0.000310829	UIC109	purified 50ppm iron	Bacteria	Firmicutes	Clostridia	Peptostreptococcales-Tissierellales	Peptostreptococcaceae	Other <1%
ASV 69	0.000310829	UIC109	purified 50ppm iron	Bacteria	Actinobacteriota	Coriobacteriia	Coriobacteriales	Eggerthellaceae	Other <1%
ASV 1320	0.000248663	UIC109	purified 50ppm iron	Bacteria	Cyanobacteria	Cyanobacteriia	Chloroplast	o__ Chloroplast	Other <1%
ASV 27	0.000248663	UIC109	purified 50ppm iron	Bacteria	Actinobacteriota	Coriobacteriia	Coriobacteriales	Atopobiaceae	Other <1%
ASV 50	0.000186498	UIC109	purified 50ppm iron	Bacteria	Firmicutes	Clostridia	Monoglobales	Monoglobaceae	Other <1%
ASV 1156	0.000124332	UIC109	purified 50ppm iron	Bacteria	Firmicutes	Clostridia	Lachnospirales	Lachnospiraceae	Other <1%
ASV 1180	0.000124332	UIC109	purified 50ppm iron	Bacteria	Firmicutes	Firmicutes	c__ Firmicutes	c__ Firmicutes	Other <1%
ASV 419	0.000124332	UIC109	purified 50ppm iron	Bacteria	Firmicutes	Bacilli	Erysipelotrichales	Erysipelatoclostridiaceae	Other <1%
ASV 661	0.000124332	UIC109	purified 50ppm iron	Bacteria	Firmicutes	Clostridia	Peptostreptococcales-Tissierellales	Anaerovoracaceae	Other <1%
ASV 96	0.000124332	UIC109	purified 50ppm iron	Bacteria	Firmicutes	Clostridia	Lachnospirales	Lachnospiraceae	Other <1%
ASV 1016	6.21659e-05	UIC109	purified 50ppm iron	Bacteria	Firmicutes	Clostridia	Oscillospirales	Ruminococcaceae	Other <1%
ASV 1301	6.21659e-05	UIC109	purified 50ppm iron	Bacteria	Firmicutes	Bacilli	Lactobacillales	o__ Lactobacillales	Other <1%
ASV 1504	6.21659e-05	UIC109	purified 50ppm iron	Bacteria	Proteobacteria	p__ Proteobacteria	p__ Proteobacteria	p__ Proteobacteria	Other <1%
ASV 2	6.21659e-05	UIC109	purified 50ppm iron	Bacteria	Proteobacteria	Gammaproteobacteria	Enterobacterales	Enterobacteriaceae	Other <1%
ASV 405	6.21659e-05	UIC109	purified 50ppm iron	Bacteria	Firmicutes	Clostridia	Peptostreptococcales-Tissierellales	Anaerovoracaceae	Other <1%
ASV 742	6.21659e-05	UIC109	purified 50ppm iron	Bacteria	Cyanobacteria	Cyanobacteriia	Chloroplast	Chloroplast	Other <1%
ASV 921	6.21659e-05	UIC109	purified 50ppm iron	Bacteria	Proteobacteria	Alphaproteobacteria	Rickettsiales	Mitochondria	Other <1%
ASV 982	6.21659e-05	UIC109	purified 50ppm iron	Bacteria	Firmicutes	Clostridia	Lachnospirales	Lachnospiraceae	Other <1%
ASV 1	0.301957	UIC109	chow LM485	Bacteria	Firmicutes	Bacilli	Lactobacillales	Lactobacillaceae	Lactobacillus
ASV 4	0.240794	UIC109	chow LM485	Bacteria	Bacteroidota	Bacteroidia	Bacteroidales	Muribaculaceae	f__ Muribaculaceae
ASV 3	0.20751	UIC109	chow LM485	Bacteria	Firmicutes	Bacilli	Erysipelotrichales	Erysipelotrichaceae	Turicibacter
ASV 92	0.047632	UIC109	chow LM485	Bacteria	Firmicutes	Clostridia	Lachnospirales	Lachnospiraceae	Lachnospiraceae NK4A136 group
ASV 37	0.0321482	UIC109	chow LM485	Bacteria	Firmicutes	Bacilli	Staphylococcales	Staphylococcaceae	Staphylococcus
ASV 25	0.0307406	UIC109	chow LM485	Bacteria	Firmicutes	Clostridia	Lachnospirales	Lachnospiraceae	f__ Lachnospiraceae
ASV 71	0.0288335	UIC109	chow LM485	Bacteria	Firmicutes	Clostridia	Clostridia UCG-014	o__ Clostridia UCG-014	o__ Clostridia UCG-014
ASV 7	0.0119875	UIC109	chow LM485	Bacteria	Bacteroidota	Bacteroidia	Bacteroidales	Bacteroidaceae	Bacteroides
ASV 32	0.0109885	UIC109	chow LM485	Bacteria	Firmicutes	Clostridia	Clostridiales	Clostridiaceae	Clostridium sensu stricto 1
ASV 94	0.00889979	UIC109	chow LM485	Bacteria	Firmicutes	Clostridia	Oscillospirales	Oscillospiraceae	Other <1%
ASV 69	0.00567588	UIC109	chow LM485	Bacteria	Actinobacteriota	Coriobacteriia	Coriobacteriales	Eggerthellaceae	Other <1%
ASV 334	0.00558507	UIC109	chow LM485	Bacteria	Firmicutes	Clostridia	Lachnospirales	Lachnospiraceae	Other <1%
ASV 142	0.00544885	UIC109	chow LM485	Bacteria	Firmicutes	Clostridia	Oscillospirales	Oscillospiraceae	Other <1%
ASV 96	0.00544885	UIC109	chow LM485	Bacteria	Firmicutes	Clostridia	Lachnospirales	Lachnospiraceae	Other <1%
ASV 424	0.0044953	UIC109	chow LM485	Bacteria	Firmicutes	Clostridia	Oscillospirales	Ruminococcaceae	Other <1%
ASV 39	0.00422286	UIC109	chow LM485	Bacteria	Firmicutes	Clostridia	Oscillospirales	[Eubacterium] coprostanoligenes group	Other <1%
ASV 15	0.00372338	UIC109	chow LM485	Bacteria	Proteobacteria	Gammaproteobacteria	Burkholderiales	Sutterellaceae	Other <1%
ASV 366	0.00372338	UIC109	chow LM485	Bacteria	Firmicutes	Bacilli	RF39	o__ RF39	Other <1%
ASV 388	0.00372338	UIC109	chow LM485	Bacteria	Firmicutes	Clostridia	Oscillospirales	Ruminococcaceae	Other <1%
ASV 56	0.00363257	UIC109	chow LM485	Bacteria	Firmicutes	Clostridia	Lachnospirales	Lachnospiraceae	Other <1%
ASV 155	0.00345094	UIC109	chow LM485	Bacteria	Firmicutes	Clostridia	Lachnospirales	Lachnospiraceae	Other <1%
ASV 240	0.00313309	UIC109	chow LM485	Bacteria	Firmicutes	Clostridia	Lachnospirales	Lachnospiraceae	Other <1%
ASV 129	0.00286065	UIC109	chow LM485	Bacteria	Firmicutes	Clostridia	Oscillospirales	Oscillospiraceae	Other <1%
ASV 200	0.00276983	UIC109	chow LM485	Bacteria	Firmicutes	Clostridia	Oscillospirales	UCG-010	Other <1%
ASV 295	0.00276983	UIC109	chow LM485	Bacteria	Firmicutes	Clostridia	Oscillospirales	Ruminococcaceae	Other <1%
ASV 266	0.00208873	UIC109	chow LM485	Bacteria	Firmicutes	Clostridia	Lachnospirales	Lachnospiraceae	Other <1%
ASV 84	0.00172547	UIC109	chow LM485	Bacteria	Firmicutes	Bacilli	Erysipelotrichales	Erysipelotrichaceae	Other <1%
ASV 73	0.00158925	UIC109	chow LM485	Bacteria	Actinobacteriota	Coriobacteriia	Coriobacteriales	Eggerthellaceae	Other <1%
ASV 262	0.00136221	UIC109	chow LM485	Bacteria	Firmicutes	Clostridia	Oscillospirales	Ruminococcaceae	Other <1%
ASV 83	0.00108977	UIC109	chow LM485	Bacteria	Firmicutes	Clostridia	Lachnospirales	Lachnospiraceae	Other <1%
ASV 248	0.000998956	UIC109	chow LM485	Bacteria	Actinobacteriota	Coriobacteriia	Coriobacteriales	Eggerthellaceae	Other <1%
ASV 627	0.000862734	UIC109	chow LM485	Bacteria	Firmicutes	Clostridia	Lachnospirales	Lachnospiraceae	Other <1%
ASV 324	0.000817327	UIC109	chow LM485	Bacteria	Firmicutes	Clostridia	Clostridia vadinBB60 group	o__ Clostridia vadinBB60 group	Other <1%
ASV 28	0.000726513	UIC109	chow LM485	Bacteria	Firmicutes	Bacilli	Erysipelotrichales	Erysipelatoclostridiaceae	Other <1%
ASV 314	0.000454071	UIC109	chow LM485	Bacteria	Firmicutes	Clostridia	Oscillospirales	Ruminococcaceae	Other <1%
ASV 169	0.000408664	UIC109	chow LM485	Bacteria	Firmicutes	Clostridia	Oscillospirales	Oscillospiraceae	Other <1%
ASV 50	0.000408664	UIC109	chow LM485	Bacteria	Firmicutes	Clostridia	Monoglobales	Monoglobaceae	Other <1%
ASV 608	0.000408664	UIC109	chow LM485	Bacteria	Firmicutes	Clostridia	Oscillospirales	Butyricicoccaceae	Other <1%
ASV 883	0.000408664	UIC109	chow LM485	Bacteria	Firmicutes	Clostridia	Oscillospirales	Butyricicoccaceae	Other <1%
ASV 174	0.000363257	UIC109	chow LM485	Bacteria	Firmicutes	Clostridia	Lachnospirales	Lachnospiraceae	Other <1%
ASV 405	0.00031785	UIC109	chow LM485	Bacteria	Firmicutes	Clostridia	Peptostreptococcales-Tissierellales	Anaerovoracaceae	Other <1%
ASV 470	0.00031785	UIC109	chow LM485	Bacteria	Firmicutes	Clostridia	Lachnospirales	Lachnospiraceae	Other <1%
ASV 376	0.000272442	UIC109	chow LM485	Bacteria	Firmicutes	Clostridia	Lachnospirales	Lachnospiraceae	Other <1%
ASV 85	0.000272442	UIC109	chow LM485	Bacteria	Firmicutes	Clostridia	Oscillospirales	Oscillospiraceae	Other <1%
ASV 10	0.000227035	UIC109	chow LM485	Bacteria	Firmicutes	Clostridia	Peptostreptococcales-Tissierellales	Peptostreptococcaceae	Other <1%
ASV 1160	0.000227035	UIC109	chow LM485	Bacteria	Firmicutes	Clostridia	c__ Clostridia	c__ Clostridia	Other <1%
ASV 419	0.000227035	UIC109	chow LM485	Bacteria	Firmicutes	Bacilli	Erysipelotrichales	Erysipelatoclostridiaceae	Other <1%
ASV 1180	0.000181628	UIC109	chow LM485	Bacteria	Firmicutes	Firmicutes	c__ Firmicutes	c__ Firmicutes	Other <1%
ASV 13	0.000181628	UIC109	chow LM485	Bacteria	Firmicutes	Bacilli	Lactobacillales	Enterococcaceae	Other <1%
ASV 133	0.000181628	UIC109	chow LM485	Bacteria	Firmicutes	Clostridia	Peptostreptococcales-Tissierellales	Anaerovoracaceae	Other <1%
ASV 1345	0.000181628	UIC109	chow LM485	Bacteria	Firmicutes	Clostridia	Oscillospirales	o__ Oscillospirales	Other <1%
ASV 52	0.000181628	UIC109	chow LM485	Bacteria	Firmicutes	Clostridia	Lachnospirales	Lachnospiraceae	Other <1%
ASV 663	0.000181628	UIC109	chow LM485	Bacteria	Firmicutes	Clostridia	Lachnospirales	Lachnospiraceae	Other <1%
ASV 1032	0.000136221	UIC109	chow LM485	Bacteria	Firmicutes	Clostridia	Lachnospirales	Lachnospiraceae	Other <1%
ASV 1141	0.000136221	UIC109	chow LM485	Bacteria	Firmicutes	Clostridia	Oscillospirales	Oscillospiraceae	Other <1%
ASV 250	0.000136221	UIC109	chow LM485	Bacteria	Firmicutes	Clostridia	Peptococcales	Peptococcaceae	Other <1%
ASV 1123	9.08141e-05	UIC109	chow LM485	Bacteria	Firmicutes	Clostridia	Oscillospirales	Oscillospiraceae	Other <1%
ASV 1275	9.08141e-05	UIC109	chow LM485	Bacteria	Firmicutes	Clostridia	Lachnospirales	Lachnospiraceae	Other <1%
ASV 44	9.08141e-05	UIC109	chow LM485	Bacteria	Actinobacteriota	Coriobacteriia	Coriobacteriales	Eggerthellaceae	Other <1%
ASV 1016	4.54071e-05	UIC109	chow LM485	Bacteria	Firmicutes	Clostridia	Oscillospirales	Ruminococcaceae	Other <1%
ASV 11	4.54071e-05	UIC109	chow LM485	Bacteria	Proteobacteria	Gammaproteobacteria	Enterobacterales	Enterobacteriaceae	Other <1%
ASV 1155	4.54071e-05	UIC109	chow LM485	Bacteria	Firmicutes	Clostridia	Lachnospirales	Lachnospiraceae	Other <1%
ASV 1364	4.54071e-05	UIC109	chow LM485	Bacteria	Actinobacteriota	Actinobacteria	Corynebacteriales	Corynebacteriaceae	Other <1%
ASV 1457	4.54071e-05	UIC109	chow LM485	Bacteria	Firmicutes	Bacilli	c__ Bacilli	c__ Bacilli	Other <1%
ASV 27	4.54071e-05	UIC109	chow LM485	Bacteria	Actinobacteriota	Coriobacteriia	Coriobacteriales	Atopobiaceae	Other <1%
ASV 5	4.54071e-05	UIC109	chow LM485	Bacteria	Firmicutes	Bacilli	Erysipelotrichales	Erysipelotrichaceae	Other <1%
ASV 737	4.54071e-05	UIC109	chow LM485	Bacteria	Firmicutes	Clostridia	Oscillospirales	Ruminococcaceae	Other <1%
ASV 742	4.54071e-05	UIC109	chow LM485	Bacteria	Cyanobacteria	Cyanobacteriia	Chloroplast	Chloroplast	Other <1%
ASV 921	4.54071e-05	UIC109	chow LM485	Bacteria	Proteobacteria	Alphaproteobacteria	Rickettsiales	Mitochondria	Other <1%
ASV 982	4.54071e-05	UIC109	chow LM485	Bacteria	Firmicutes	Clostridia	Lachnospirales	Lachnospiraceae	Other <1%
ASV 1	0.228048	UIC110	purified 50ppm iron	Bacteria	Firmicutes	Bacilli	Lactobacillales	Lactobacillaceae	Lactobacillus
ASV 8	0.162329	UIC110	purified 50ppm iron	Bacteria	Verrucomicrobiota	Verrucomicrobiae	Verrucomicrobiales	Akkermansiaceae	Akkermansia
ASV 3	0.155765	UIC110	purified 50ppm iron	Bacteria	Firmicutes	Bacilli	Erysipelotrichales	Erysipelotrichaceae	Turicibacter
ASV 25	0.110819	UIC110	purified 50ppm iron	Bacteria	Firmicutes	Clostridia	Lachnospirales	Lachnospiraceae	f__ Lachnospiraceae
ASV 6	0.0712024	UIC110	purified 50ppm iron	Bacteria	Firmicutes	Bacilli	Lactobacillales	Streptococcaceae	Lactococcus
ASV 15	0.0573017	UIC110	purified 50ppm iron	Bacteria	Proteobacteria	Gammaproteobacteria	Burkholderiales	Sutterellaceae	Parasutterella
ASV 10	0.0335933	UIC110	purified 50ppm iron	Bacteria	Firmicutes	Clostridia	Peptostreptococcales-Tissierellales	Peptostreptococcaceae	Romboutsia
ASV 28	0.0282647	UIC110	purified 50ppm iron	Bacteria	Firmicutes	Bacilli	Erysipelotrichales	Erysipelatoclostridiaceae	Erysipelatoclostridium
ASV 240	0.0241718	UIC110	purified 50ppm iron	Bacteria	Firmicutes	Clostridia	Lachnospirales	Lachnospiraceae	Lachnoclostridium
ASV 52	0.018457	UIC110	purified 50ppm iron	Bacteria	Firmicutes	Clostridia	Lachnospirales	Lachnospiraceae	Blautia
ASV 56	0.0159858	UIC110	purified 50ppm iron	Bacteria	Firmicutes	Clostridia	Lachnospirales	Lachnospiraceae	Marvinbryantia
ASV 32	0.013669	UIC110	purified 50ppm iron	Bacteria	Firmicutes	Clostridia	Clostridiales	Clostridiaceae	Clostridium sensu stricto 1
ASV 92	0.0128195	UIC110	purified 50ppm iron	Bacteria	Firmicutes	Clostridia	Lachnospirales	Lachnospiraceae	Lachnospiraceae NK4A136 group
ASV 39	0.00849486	UIC110	purified 50ppm iron	Bacteria	Firmicutes	Clostridia	Oscillospirales	[Eubacterium] coprostanoligenes group	Other <1%
ASV 142	0.00733647	UIC110	purified 50ppm iron	Bacteria	Firmicutes	Clostridia	Oscillospirales	Oscillospiraceae	Other <1%
ASV 295	0.00733647	UIC110	purified 50ppm iron	Bacteria	Firmicutes	Clostridia	Oscillospirales	Ruminococcaceae	Other <1%
ASV 94	0.00656421	UIC110	purified 50ppm iron	Bacteria	Firmicutes	Clostridia	Oscillospirales	Oscillospiraceae	Other <1%
ASV 84	0.00594641	UIC110	purified 50ppm iron	Bacteria	Firmicutes	Bacilli	Erysipelotrichales	Erysipelotrichaceae	Other <1%
ASV 7	0.00393853	UIC110	purified 50ppm iron	Bacteria	Bacteroidota	Bacteroidia	Bacteroidales	Bacteroidaceae	Other <1%
ASV 129	0.00308904	UIC110	purified 50ppm iron	Bacteria	Firmicutes	Clostridia	Oscillospirales	Oscillospiraceae	Other <1%
ASV 4	0.00301182	UIC110	purified 50ppm iron	Bacteria	Bacteroidota	Bacteroidia	Bacteroidales	Muribaculaceae	Other <1%
ASV 155	0.00278014	UIC110	purified 50ppm iron	Bacteria	Firmicutes	Clostridia	Lachnospirales	Lachnospiraceae	Other <1%
ASV 200	0.00239401	UIC110	purified 50ppm iron	Bacteria	Firmicutes	Clostridia	Oscillospirales	UCG-010	Other <1%
ASV 73	0.0017762	UIC110	purified 50ppm iron	Bacteria	Actinobacteriota	Coriobacteriia	Coriobacteriales	Eggerthellaceae	Other <1%
ASV 85	0.00146729	UIC110	purified 50ppm iron	Bacteria	Firmicutes	Clostridia	Oscillospirales	Oscillospiraceae	Other <1%
ASV 627	0.00123562	UIC110	purified 50ppm iron	Bacteria	Firmicutes	Clostridia	Lachnospirales	Lachnospiraceae	Other <1%
ASV 174	0.00108116	UIC110	purified 50ppm iron	Bacteria	Firmicutes	Clostridia	Lachnospirales	Lachnospiraceae	Other <1%
ASV 328	0.00108116	UIC110	purified 50ppm iron	Bacteria	Firmicutes	Clostridia	Peptostreptococcales-Tissierellales	Peptostreptococcaceae	Other <1%
ASV 44	0.00108116	UIC110	purified 50ppm iron	Bacteria	Actinobacteriota	Coriobacteriia	Coriobacteriales	Eggerthellaceae	Other <1%
ASV 262	0.00100394	UIC110	purified 50ppm iron	Bacteria	Firmicutes	Clostridia	Oscillospirales	Ruminococcaceae	Other <1%
ASV 250	0.000849486	UIC110	purified 50ppm iron	Bacteria	Firmicutes	Clostridia	Peptococcales	Peptococcaceae	Other <1%
ASV 169	0.000617808	UIC110	purified 50ppm iron	Bacteria	Firmicutes	Clostridia	Oscillospirales	Oscillospiraceae	Other <1%
ASV 266	0.000617808	UIC110	purified 50ppm iron	Bacteria	Firmicutes	Clostridia	Lachnospirales	Lachnospiraceae	Other <1%
ASV 644	0.000617808	UIC110	purified 50ppm iron	Bacteria	Firmicutes	Clostridia	Peptostreptococcales-Tissierellales	Peptostreptococcaceae	Other <1%
ASV 314	0.000540582	UIC110	purified 50ppm iron	Bacteria	Firmicutes	Clostridia	Oscillospirales	Ruminococcaceae	Other <1%
ASV 71	0.000540582	UIC110	purified 50ppm iron	Bacteria	Firmicutes	Clostridia	Clostridia UCG-014	o__ Clostridia UCG-014	Other <1%
ASV 405	0.000463356	UIC110	purified 50ppm iron	Bacteria	Firmicutes	Clostridia	Peptostreptococcales-Tissierellales	Anaerovoracaceae	Other <1%
ASV 982	0.00038613	UIC110	purified 50ppm iron	Bacteria	Firmicutes	Clostridia	Lachnospirales	Lachnospiraceae	Other <1%
ASV 37	0.000308904	UIC110	purified 50ppm iron	Bacteria	Firmicutes	Bacilli	Staphylococcales	Staphylococcaceae	Other <1%
ASV 376	0.000308904	UIC110	purified 50ppm iron	Bacteria	Firmicutes	Clostridia	Lachnospirales	Lachnospiraceae	Other <1%
ASV 1016	0.000231678	UIC110	purified 50ppm iron	Bacteria	Firmicutes	Clostridia	Oscillospirales	Ruminococcaceae	Other <1%
ASV 1155	0.000231678	UIC110	purified 50ppm iron	Bacteria	Firmicutes	Clostridia	Lachnospirales	Lachnospiraceae	Other <1%
ASV 366	0.000231678	UIC110	purified 50ppm iron	Bacteria	Firmicutes	Bacilli	RF39	o__ RF39	Other <1%
ASV 419	0.000231678	UIC110	purified 50ppm iron	Bacteria	Firmicutes	Bacilli	Erysipelotrichales	Erysipelatoclostridiaceae	Other <1%
ASV 96	0.000231678	UIC110	purified 50ppm iron	Bacteria	Firmicutes	Clostridia	Lachnospirales	Lachnospiraceae	Other <1%
ASV 1156	0.000154452	UIC110	purified 50ppm iron	Bacteria	Firmicutes	Clostridia	Lachnospirales	Lachnospiraceae	Other <1%
ASV 1181	0.000154452	UIC110	purified 50ppm iron	Bacteria	Bacteroidota	Bacteroidia	Bacteroidales	Tannerellaceae	Other <1%
ASV 133	0.000154452	UIC110	purified 50ppm iron	Bacteria	Firmicutes	Clostridia	Peptostreptococcales-Tissierellales	Anaerovoracaceae	Other <1%
ASV 2	0.000154452	UIC110	purified 50ppm iron	Bacteria	Proteobacteria	Gammaproteobacteria	Enterobacterales	Enterobacteriaceae	Other <1%
ASV 248	0.000154452	UIC110	purified 50ppm iron	Bacteria	Actinobacteriota	Coriobacteriia	Coriobacteriales	Eggerthellaceae	Other <1%
ASV 27	0.000154452	UIC110	purified 50ppm iron	Bacteria	Actinobacteriota	Coriobacteriia	Coriobacteriales	Atopobiaceae	Other <1%
ASV 1032	7.7226e-05	UIC110	purified 50ppm iron	Bacteria	Firmicutes	Clostridia	Lachnospirales	Lachnospiraceae	Other <1%
ASV 1158	7.7226e-05	UIC110	purified 50ppm iron	Bacteria	Firmicutes	Bacilli	Erysipelotrichales	Erysipelotrichaceae	Other <1%
ASV 13	7.7226e-05	UIC110	purified 50ppm iron	Bacteria	Firmicutes	Bacilli	Lactobacillales	Enterococcaceae	Other <1%
ASV 334	7.7226e-05	UIC110	purified 50ppm iron	Bacteria	Firmicutes	Clostridia	Lachnospirales	Lachnospiraceae	Other <1%
ASV 5	7.7226e-05	UIC110	purified 50ppm iron	Bacteria	Firmicutes	Bacilli	Erysipelotrichales	Erysipelotrichaceae	Other <1%
ASV 50	7.7226e-05	UIC110	purified 50ppm iron	Bacteria	Firmicutes	Clostridia	Monoglobales	Monoglobaceae	Other <1%
ASV 69	7.7226e-05	UIC110	purified 50ppm iron	Bacteria	Actinobacteriota	Coriobacteriia	Coriobacteriales	Eggerthellaceae	Other <1%
ASV 921	7.7226e-05	UIC110	purified 50ppm iron	Bacteria	Proteobacteria	Alphaproteobacteria	Rickettsiales	Mitochondria	Other <1%
ASV 1	0.27565	UIC110	chow LM485	Bacteria	Firmicutes	Bacilli	Lactobacillales	Lactobacillaceae	Lactobacillus
ASV 4	0.273133	UIC110	chow LM485	Bacteria	Bacteroidota	Bacteroidia	Bacteroidales	Muribaculaceae	f__ Muribaculaceae
ASV 3	0.213413	UIC110	chow LM485	Bacteria	Firmicutes	Bacilli	Erysipelotrichales	Erysipelotrichaceae	Turicibacter
ASV 71	0.0490397	UIC110	chow LM485	Bacteria	Firmicutes	Clostridia	Clostridia UCG-014	o__ Clostridia UCG-014	o__ Clostridia UCG-014
ASV 92	0.042929	UIC110	chow LM485	Bacteria	Firmicutes	Clostridia	Lachnospirales	Lachnospiraceae	Lachnospiraceae NK4A136 group
ASV 37	0.0330697	UIC110	chow LM485	Bacteria	Firmicutes	Bacilli	Staphylococcales	Staphylococcaceae	Staphylococcus
ASV 25	0.026805	UIC110	chow LM485	Bacteria	Firmicutes	Clostridia	Lachnospirales	Lachnospiraceae	f__ Lachnospiraceae
ASV 7	0.0120674	UIC110	chow LM485	Bacteria	Bacteroidota	Bacteroidia	Bacteroidales	Bacteroidaceae	Bacteroides
ASV 366	0.00662422	UIC110	chow LM485	Bacteria	Firmicutes	Bacilli	RF39	o__ RF39	Other <1%
ASV 32	0.00575126	UIC110	chow LM485	Bacteria	Firmicutes	Clostridia	Clostridiales	Clostridiaceae	Other <1%
ASV 96	0.00492965	UIC110	chow LM485	Bacteria	Firmicutes	Clostridia	Lachnospirales	Lachnospiraceae	Other <1%
ASV 94	0.0044675	UIC110	chow LM485	Bacteria	Firmicutes	Clostridia	Oscillospirales	Oscillospiraceae	Other <1%
ASV 334	0.00400534	UIC110	chow LM485	Bacteria	Firmicutes	Clostridia	Lachnospirales	Lachnospiraceae	Other <1%
ASV 39	0.00400534	UIC110	chow LM485	Bacteria	Firmicutes	Clostridia	Oscillospirales	[Eubacterium] coprostanoligenes group	Other <1%
ASV 56	0.00385129	UIC110	chow LM485	Bacteria	Firmicutes	Clostridia	Lachnospirales	Lachnospiraceae	Other <1%
ASV 142	0.00379994	UIC110	chow LM485	Bacteria	Firmicutes	Clostridia	Oscillospirales	Oscillospiraceae	Other <1%
ASV 15	0.00338913	UIC110	chow LM485	Bacteria	Proteobacteria	Gammaproteobacteria	Burkholderiales	Sutterellaceae	Other <1%
ASV 200	0.00272158	UIC110	chow LM485	Bacteria	Firmicutes	Clostridia	Oscillospirales	UCG-010	Other <1%
ASV 240	0.00256753	UIC110	chow LM485	Bacteria	Firmicutes	Clostridia	Lachnospirales	Lachnospiraceae	Other <1%
ASV 266	0.00256753	UIC110	chow LM485	Bacteria	Firmicutes	Clostridia	Lachnospirales	Lachnospiraceae	Other <1%
ASV 129	0.00251618	UIC110	chow LM485	Bacteria	Firmicutes	Clostridia	Oscillospirales	Oscillospiraceae	Other <1%
ASV 83	0.00251618	UIC110	chow LM485	Bacteria	Firmicutes	Clostridia	Lachnospirales	Lachnospiraceae	Other <1%
ASV 84	0.00251618	UIC110	chow LM485	Bacteria	Firmicutes	Bacilli	Erysipelotrichales	Erysipelotrichaceae	Other <1%
ASV 69	0.00236212	UIC110	chow LM485	Bacteria	Actinobacteriota	Coriobacteriia	Coriobacteriales	Eggerthellaceae	Other <1%
ASV 388	0.00179727	UIC110	chow LM485	Bacteria	Firmicutes	Clostridia	Oscillospirales	Ruminococcaceae	Other <1%
ASV 73	0.00159187	UIC110	chow LM485	Bacteria	Actinobacteriota	Coriobacteriia	Coriobacteriales	Eggerthellaceae	Other <1%
ASV 262	0.00118106	UIC110	chow LM485	Bacteria	Firmicutes	Clostridia	Oscillospirales	Ruminococcaceae	Other <1%
ASV 155	0.00102701	UIC110	chow LM485	Bacteria	Firmicutes	Clostridia	Lachnospirales	Lachnospiraceae	Other <1%
ASV 295	0.00097566	UIC110	chow LM485	Bacteria	Firmicutes	Clostridia	Oscillospirales	Ruminococcaceae	Other <1%
ASV 470	0.00097566	UIC110	chow LM485	Bacteria	Firmicutes	Clostridia	Lachnospirales	Lachnospiraceae	Other <1%
ASV 248	0.000770258	UIC110	chow LM485	Bacteria	Actinobacteriota	Coriobacteriia	Coriobacteriales	Eggerthellaceae	Other <1%
ASV 28	0.000770258	UIC110	chow LM485	Bacteria	Firmicutes	Bacilli	Erysipelotrichales	Erysipelatoclostridiaceae	Other <1%
ASV 324	0.000667557	UIC110	chow LM485	Bacteria	Firmicutes	Clostridia	Clostridia vadinBB60 group	o__ Clostridia vadinBB60 group	Other <1%
ASV 314	0.000513505	UIC110	chow LM485	Bacteria	Firmicutes	Clostridia	Oscillospirales	Ruminococcaceae	Other <1%
ASV 1180	0.000410804	UIC110	chow LM485	Bacteria	Firmicutes	Firmicutes	c__ Firmicutes	c__ Firmicutes	Other <1%
ASV 50	0.000410804	UIC110	chow LM485	Bacteria	Firmicutes	Clostridia	Monoglobales	Monoglobaceae	Other <1%
ASV 376	0.000359454	UIC110	chow LM485	Bacteria	Firmicutes	Clostridia	Lachnospirales	Lachnospiraceae	Other <1%
ASV 52	0.000359454	UIC110	chow LM485	Bacteria	Firmicutes	Clostridia	Lachnospirales	Lachnospiraceae	Other <1%
ASV 608	0.000359454	UIC110	chow LM485	Bacteria	Firmicutes	Clostridia	Oscillospirales	Butyricicoccaceae	Other <1%
ASV 883	0.000359454	UIC110	chow LM485	Bacteria	Firmicutes	Clostridia	Oscillospirales	Butyricicoccaceae	Other <1%
ASV 133	0.000308103	UIC110	chow LM485	Bacteria	Firmicutes	Clostridia	Peptostreptococcales-Tissierellales	Anaerovoracaceae	Other <1%
ASV 169	0.000308103	UIC110	chow LM485	Bacteria	Firmicutes	Clostridia	Oscillospirales	Oscillospiraceae	Other <1%
ASV 250	0.000308103	UIC110	chow LM485	Bacteria	Firmicutes	Clostridia	Peptococcales	Peptococcaceae	Other <1%
ASV 627	0.000308103	UIC110	chow LM485	Bacteria	Firmicutes	Clostridia	Lachnospirales	Lachnospiraceae	Other <1%
ASV 1123	0.000256753	UIC110	chow LM485	Bacteria	Firmicutes	Clostridia	Oscillospirales	Oscillospiraceae	Other <1%
ASV 405	0.000256753	UIC110	chow LM485	Bacteria	Firmicutes	Clostridia	Peptostreptococcales-Tissierellales	Anaerovoracaceae	Other <1%
ASV 174	0.000205402	UIC110	chow LM485	Bacteria	Firmicutes	Clostridia	Lachnospirales	Lachnospiraceae	Other <1%
ASV 1032	0.000102701	UIC110	chow LM485	Bacteria	Firmicutes	Clostridia	Lachnospirales	Lachnospiraceae	Other <1%
ASV 1160	0.000102701	UIC110	chow LM485	Bacteria	Firmicutes	Clostridia	c__ Clostridia	c__ Clostridia	Other <1%
ASV 1345	0.000102701	UIC110	chow LM485	Bacteria	Firmicutes	Clostridia	Oscillospirales	o__ Oscillospirales	Other <1%
ASV 982	0.000102701	UIC110	chow LM485	Bacteria	Firmicutes	Clostridia	Lachnospirales	Lachnospiraceae	Other <1%
ASV 1155	5.13505e-05	UIC110	chow LM485	Bacteria	Firmicutes	Clostridia	Lachnospirales	Lachnospiraceae	Other <1%
ASV 1158	5.13505e-05	UIC110	chow LM485	Bacteria	Firmicutes	Bacilli	Erysipelotrichales	Erysipelotrichaceae	Other <1%
ASV 1275	5.13505e-05	UIC110	chow LM485	Bacteria	Firmicutes	Clostridia	Lachnospirales	Lachnospiraceae	Other <1%
ASV 1454	5.13505e-05	UIC110	chow LM485	Bacteria	Bacteroidota	Bacteroidia	Bacteroidales	Tannerellaceae	Other <1%
ASV 1457	5.13505e-05	UIC110	chow LM485	Bacteria	Firmicutes	Bacilli	c__ Bacilli	c__ Bacilli	Other <1%
ASV 2	5.13505e-05	UIC110	chow LM485	Bacteria	Proteobacteria	Gammaproteobacteria	Enterobacterales	Enterobacteriaceae	Other <1%
ASV 419	5.13505e-05	UIC110	chow LM485	Bacteria	Firmicutes	Bacilli	Erysipelotrichales	Erysipelatoclostridiaceae	Other <1%
ASV 8	5.13505e-05	UIC110	chow LM485	Bacteria	Verrucomicrobiota	Verrucomicrobiae	Verrucomicrobiales	Akkermansiaceae	Other <1%
ASV 1	0.212862	UIC111	purified 50ppm iron	Bacteria	Firmicutes	Bacilli	Lactobacillales	Lactobacillaceae	Lactobacillus
ASV 8	0.127578	UIC111	purified 50ppm iron	Bacteria	Verrucomicrobiota	Verrucomicrobiae	Verrucomicrobiales	Akkermansiaceae	Akkermansia
ASV 3	0.124106	UIC111	purified 50ppm iron	Bacteria	Firmicutes	Bacilli	Erysipelotrichales	Erysipelotrichaceae	Turicibacter
ASV 7	0.118967	UIC111	purified 50ppm iron	Bacteria	Bacteroidota	Bacteroidia	Bacteroidales	Bacteroidaceae	Bacteroides
ASV 25	0.0932009	UIC111	purified 50ppm iron	Bacteria	Firmicutes	Clostridia	Lachnospirales	Lachnospiraceae	f__ Lachnospiraceae
ASV 4	0.075283	UIC111	purified 50ppm iron	Bacteria	Bacteroidota	Bacteroidia	Bacteroidales	Muribaculaceae	f__ Muribaculaceae
ASV 6	0.0446559	UIC111	purified 50ppm iron	Bacteria	Firmicutes	Bacilli	Lactobacillales	Streptococcaceae	Lactococcus
ASV 15	0.0438225	UIC111	purified 50ppm iron	Bacteria	Proteobacteria	Gammaproteobacteria	Burkholderiales	Sutterellaceae	Parasutterella
ASV 10	0.0226405	UIC111	purified 50ppm iron	Bacteria	Firmicutes	Clostridia	Peptostreptococcales-Tissierellales	Peptostreptococcaceae	Romboutsia
ASV 28	0.0204181	UIC111	purified 50ppm iron	Bacteria	Firmicutes	Bacilli	Erysipelotrichales	Erysipelatoclostridiaceae	Erysipelatoclostridium
ASV 56	0.0140982	UIC111	purified 50ppm iron	Bacteria	Firmicutes	Clostridia	Lachnospirales	Lachnospiraceae	Marvinbryantia
ASV 39	0.0118064	UIC111	purified 50ppm iron	Bacteria	Firmicutes	Clostridia	Oscillospirales	[Eubacterium] coprostanoligenes group	f__ [Eubacterium] coprostanoligenes group
ASV 32	0.0110424	UIC111	purified 50ppm iron	Bacteria	Firmicutes	Clostridia	Clostridiales	Clostridiaceae	Clostridium sensu stricto 1
ASV 52	0.00923675	UIC111	purified 50ppm iron	Bacteria	Firmicutes	Clostridia	Lachnospirales	Lachnospiraceae	Other <1%
ASV 92	0.00750052	UIC111	purified 50ppm iron	Bacteria	Firmicutes	Clostridia	Lachnospirales	Lachnospiraceae	Other <1%
ASV 142	0.00722272	UIC111	purified 50ppm iron	Bacteria	Firmicutes	Clostridia	Oscillospirales	Oscillospiraceae	Other <1%
ASV 84	0.00715327	UIC111	purified 50ppm iron	Bacteria	Firmicutes	Bacilli	Erysipelotrichales	Erysipelotrichaceae	Other <1%
ASV 240	0.00701438	UIC111	purified 50ppm iron	Bacteria	Firmicutes	Clostridia	Lachnospirales	Lachnospiraceae	Other <1%
ASV 94	0.00645878	UIC111	purified 50ppm iron	Bacteria	Firmicutes	Clostridia	Oscillospirales	Oscillospiraceae	Other <1%
ASV 129	0.0050698	UIC111	purified 50ppm iron	Bacteria	Firmicutes	Clostridia	Oscillospirales	Oscillospiraceae	Other <1%
ASV 85	0.0046531	UIC111	purified 50ppm iron	Bacteria	Firmicutes	Clostridia	Oscillospirales	Oscillospiraceae	Other <1%
ASV 73	0.00375026	UIC111	purified 50ppm iron	Bacteria	Actinobacteriota	Coriobacteriia	Coriobacteriales	Eggerthellaceae	Other <1%
ASV 155	0.00340301	UIC111	purified 50ppm iron	Bacteria	Firmicutes	Clostridia	Lachnospirales	Lachnospiraceae	Other <1%
ASV 295	0.00305577	UIC111	purified 50ppm iron	Bacteria	Firmicutes	Clostridia	Oscillospirales	Ruminococcaceae	Other <1%
ASV 200	0.00159733	UIC111	purified 50ppm iron	Bacteria	Firmicutes	Clostridia	Oscillospirales	UCG-010	Other <1%
ASV 133	0.00125009	UIC111	purified 50ppm iron	Bacteria	Firmicutes	Clostridia	Peptostreptococcales-Tissierellales	Anaerovoracaceae	Other <1%
ASV 262	0.00118064	UIC111	purified 50ppm iron	Bacteria	Firmicutes	Clostridia	Oscillospirales	Ruminococcaceae	Other <1%
ASV 266	0.00118064	UIC111	purified 50ppm iron	Bacteria	Firmicutes	Clostridia	Lachnospirales	Lachnospiraceae	Other <1%
ASV 328	0.00118064	UIC111	purified 50ppm iron	Bacteria	Firmicutes	Clostridia	Peptostreptococcales-Tissierellales	Peptostreptococcaceae	Other <1%
ASV 44	0.00118064	UIC111	purified 50ppm iron	Bacteria	Actinobacteriota	Coriobacteriia	Coriobacteriales	Eggerthellaceae	Other <1%
ASV 627	0.00118064	UIC111	purified 50ppm iron	Bacteria	Firmicutes	Clostridia	Lachnospirales	Lachnospiraceae	Other <1%
ASV 314	0.000833391	UIC111	purified 50ppm iron	Bacteria	Firmicutes	Clostridia	Oscillospirales	Ruminococcaceae	Other <1%
ASV 169	0.000625043	UIC111	purified 50ppm iron	Bacteria	Firmicutes	Clostridia	Oscillospirales	Oscillospiraceae	Other <1%
ASV 69	0.000625043	UIC111	purified 50ppm iron	Bacteria	Actinobacteriota	Coriobacteriia	Coriobacteriales	Eggerthellaceae	Other <1%
ASV 174	0.000555594	UIC111	purified 50ppm iron	Bacteria	Firmicutes	Clostridia	Lachnospirales	Lachnospiraceae	Other <1%
ASV 250	0.000555594	UIC111	purified 50ppm iron	Bacteria	Firmicutes	Clostridia	Peptococcales	Peptococcaceae	Other <1%
ASV 419	0.000416696	UIC111	purified 50ppm iron	Bacteria	Firmicutes	Bacilli	Erysipelotrichales	Erysipelatoclostridiaceae	Other <1%
ASV 1032	0.000277797	UIC111	purified 50ppm iron	Bacteria	Firmicutes	Clostridia	Lachnospirales	Lachnospiraceae	Other <1%
ASV 248	0.000277797	UIC111	purified 50ppm iron	Bacteria	Actinobacteriota	Coriobacteriia	Coriobacteriales	Eggerthellaceae	Other <1%
ASV 644	0.000277797	UIC111	purified 50ppm iron	Bacteria	Firmicutes	Clostridia	Peptostreptococcales-Tissierellales	Peptostreptococcaceae	Other <1%
ASV 376	0.000208348	UIC111	purified 50ppm iron	Bacteria	Firmicutes	Clostridia	Lachnospirales	Lachnospiraceae	Other <1%
ASV 1156	0.000138899	UIC111	purified 50ppm iron	Bacteria	Firmicutes	Clostridia	Lachnospirales	Lachnospiraceae	Other <1%
ASV 1160	0.000138899	UIC111	purified 50ppm iron	Bacteria	Firmicutes	Clostridia	c__ Clostridia	c__ Clostridia	Other <1%
ASV 13	0.000138899	UIC111	purified 50ppm iron	Bacteria	Firmicutes	Bacilli	Lactobacillales	Enterococcaceae	Other <1%
ASV 405	0.000138899	UIC111	purified 50ppm iron	Bacteria	Firmicutes	Clostridia	Peptostreptococcales-Tissierellales	Anaerovoracaceae	Other <1%
ASV 661	0.000138899	UIC111	purified 50ppm iron	Bacteria	Firmicutes	Clostridia	Peptostreptococcales-Tissierellales	Anaerovoracaceae	Other <1%
ASV 71	0.000138899	UIC111	purified 50ppm iron	Bacteria	Firmicutes	Clostridia	Clostridia UCG-014	o__ Clostridia UCG-014	Other <1%
ASV 1016	6.94493e-05	UIC111	purified 50ppm iron	Bacteria	Firmicutes	Clostridia	Oscillospirales	Ruminococcaceae	Other <1%
ASV 1155	6.94493e-05	UIC111	purified 50ppm iron	Bacteria	Firmicutes	Clostridia	Lachnospirales	Lachnospiraceae	Other <1%
ASV 1301	6.94493e-05	UIC111	purified 50ppm iron	Bacteria	Firmicutes	Bacilli	Lactobacillales	o__ Lactobacillales	Other <1%
ASV 1320	6.94493e-05	UIC111	purified 50ppm iron	Bacteria	Cyanobacteria	Cyanobacteriia	Chloroplast	o__ Chloroplast	Other <1%
ASV 2	6.94493e-05	UIC111	purified 50ppm iron	Bacteria	Proteobacteria	Gammaproteobacteria	Enterobacterales	Enterobacteriaceae	Other <1%
ASV 334	6.94493e-05	UIC111	purified 50ppm iron	Bacteria	Firmicutes	Clostridia	Lachnospirales	Lachnospiraceae	Other <1%
ASV 366	6.94493e-05	UIC111	purified 50ppm iron	Bacteria	Firmicutes	Bacilli	RF39	o__ RF39	Other <1%
ASV 5	6.94493e-05	UIC111	purified 50ppm iron	Bacteria	Firmicutes	Bacilli	Erysipelotrichales	Erysipelotrichaceae	Other <1%
ASV 50	6.94493e-05	UIC111	purified 50ppm iron	Bacteria	Firmicutes	Clostridia	Monoglobales	Monoglobaceae	Other <1%
ASV 663	6.94493e-05	UIC111	purified 50ppm iron	Bacteria	Firmicutes	Clostridia	Lachnospirales	Lachnospiraceae	Other <1%
ASV 96	6.94493e-05	UIC111	purified 50ppm iron	Bacteria	Firmicutes	Clostridia	Lachnospirales	Lachnospiraceae	Other <1%
ASV 1	0.371616	UIC111	chow LM485	Bacteria	Firmicutes	Bacilli	Lactobacillales	Lactobacillaceae	Lactobacillus
ASV 4	0.237925	UIC111	chow LM485	Bacteria	Bacteroidota	Bacteroidia	Bacteroidales	Muribaculaceae	f__ Muribaculaceae
ASV 3	0.180366	UIC111	chow LM485	Bacteria	Firmicutes	Bacilli	Erysipelotrichales	Erysipelotrichaceae	Turicibacter
ASV 37	0.0411523	UIC111	chow LM485	Bacteria	Firmicutes	Bacilli	Staphylococcales	Staphylococcaceae	Staphylococcus
ASV 92	0.0245831	UIC111	chow LM485	Bacteria	Firmicutes	Clostridia	Lachnospirales	Lachnospiraceae	Lachnospiraceae NK4A136 group
ASV 25	0.0237167	UIC111	chow LM485	Bacteria	Firmicutes	Clostridia	Lachnospirales	Lachnospiraceae	f__ Lachnospiraceae
ASV 71	0.0237167	UIC111	chow LM485	Bacteria	Firmicutes	Clostridia	Clostridia UCG-014	o__ Clostridia UCG-014	o__ Clostridia UCG-014
ASV 7	0.0172731	UIC111	chow LM485	Bacteria	Bacteroidota	Bacteroidia	Bacteroidales	Bacteroidaceae	Bacteroides
ASV 32	0.015757	UIC111	chow LM485	Bacteria	Firmicutes	Clostridia	Clostridiales	Clostridiaceae	Clostridium sensu stricto 1
ASV 94	0.00898852	UIC111	chow LM485	Bacteria	Firmicutes	Clostridia	Oscillospirales	Oscillospiraceae	Other <1%
ASV 69	0.00660602	UIC111	chow LM485	Bacteria	Actinobacteriota	Coriobacteriia	Coriobacteriales	Eggerthellaceae	Other <1%
ASV 334	0.00611869	UIC111	chow LM485	Bacteria	Firmicutes	Clostridia	Lachnospirales	Lachnospiraceae	Other <1%
ASV 96	0.00541477	UIC111	chow LM485	Bacteria	Firmicutes	Clostridia	Lachnospirales	Lachnospiraceae	Other <1%
ASV 83	0.0036279	UIC111	chow LM485	Bacteria	Firmicutes	Clostridia	Lachnospirales	Lachnospiraceae	Other <1%
ASV 142	0.00324886	UIC111	chow LM485	Bacteria	Firmicutes	Clostridia	Oscillospirales	Oscillospiraceae	Other <1%
ASV 366	0.00276153	UIC111	chow LM485	Bacteria	Firmicutes	Bacilli	RF39	o__ RF39	Other <1%
ASV 155	0.00243665	UIC111	chow LM485	Bacteria	Firmicutes	Clostridia	Lachnospirales	Lachnospiraceae	Other <1%
ASV 388	0.0023825	UIC111	chow LM485	Bacteria	Firmicutes	Clostridia	Oscillospirales	Ruminococcaceae	Other <1%
ASV 240	0.00216591	UIC111	chow LM485	Bacteria	Firmicutes	Clostridia	Lachnospirales	Lachnospiraceae	Other <1%
ASV 295	0.00157028	UIC111	chow LM485	Bacteria	Firmicutes	Clostridia	Oscillospirales	Ruminococcaceae	Other <1%
ASV 129	0.00135369	UIC111	chow LM485	Bacteria	Firmicutes	Clostridia	Oscillospirales	Oscillospiraceae	Other <1%
ASV 262	0.00129955	UIC111	chow LM485	Bacteria	Firmicutes	Clostridia	Oscillospirales	Ruminococcaceae	Other <1%
ASV 56	0.0011371	UIC111	chow LM485	Bacteria	Firmicutes	Clostridia	Lachnospirales	Lachnospiraceae	Other <1%
ASV 84	0.0011371	UIC111	chow LM485	Bacteria	Firmicutes	Bacilli	Erysipelotrichales	Erysipelotrichaceae	Other <1%
ASV 73	0.00108295	UIC111	chow LM485	Bacteria	Actinobacteriota	Coriobacteriia	Coriobacteriales	Eggerthellaceae	Other <1%
ASV 324	0.00102881	UIC111	chow LM485	Bacteria	Firmicutes	Clostridia	Clostridia vadinBB60 group	o__ Clostridia vadinBB60 group	Other <1%
ASV 266	0.000974659	UIC111	chow LM485	Bacteria	Firmicutes	Clostridia	Lachnospirales	Lachnospiraceae	Other <1%
ASV 248	0.000920511	UIC111	chow LM485	Bacteria	Actinobacteriota	Coriobacteriia	Coriobacteriales	Eggerthellaceae	Other <1%
ASV 39	0.000920511	UIC111	chow LM485	Bacteria	Firmicutes	Clostridia	Oscillospirales	[Eubacterium] coprostanoligenes group	Other <1%
ASV 376	0.000866363	UIC111	chow LM485	Bacteria	Firmicutes	Clostridia	Lachnospirales	Lachnospiraceae	Other <1%
ASV 50	0.000866363	UIC111	chow LM485	Bacteria	Firmicutes	Clostridia	Monoglobales	Monoglobaceae	Other <1%
ASV 200	0.000812216	UIC111	chow LM485	Bacteria	Firmicutes	Clostridia	Oscillospirales	UCG-010	Other <1%
ASV 424	0.000758068	UIC111	chow LM485	Bacteria	Firmicutes	Clostridia	Oscillospirales	Ruminococcaceae	Other <1%
ASV 314	0.000595625	UIC111	chow LM485	Bacteria	Firmicutes	Clostridia	Oscillospirales	Ruminococcaceae	Other <1%
ASV 15	0.000541477	UIC111	chow LM485	Bacteria	Proteobacteria	Gammaproteobacteria	Burkholderiales	Sutterellaceae	Other <1%
ASV 470	0.000487329	UIC111	chow LM485	Bacteria	Firmicutes	Clostridia	Lachnospirales	Lachnospiraceae	Other <1%
ASV 10	0.000379034	UIC111	chow LM485	Bacteria	Firmicutes	Clostridia	Peptostreptococcales-Tissierellales	Peptostreptococcaceae	Other <1%
ASV 28	0.000379034	UIC111	chow LM485	Bacteria	Firmicutes	Bacilli	Erysipelotrichales	Erysipelatoclostridiaceae	Other <1%
ASV 627	0.000379034	UIC111	chow LM485	Bacteria	Firmicutes	Clostridia	Lachnospirales	Lachnospiraceae	Other <1%
ASV 1123	0.000270739	UIC111	chow LM485	Bacteria	Firmicutes	Clostridia	Oscillospirales	Oscillospiraceae	Other <1%
ASV 1141	0.000216591	UIC111	chow LM485	Bacteria	Firmicutes	Clostridia	Oscillospirales	Oscillospiraceae	Other <1%
ASV 1301	0.000162443	UIC111	chow LM485	Bacteria	Firmicutes	Bacilli	Lactobacillales	o__ Lactobacillales	Other <1%
ASV 250	0.000162443	UIC111	chow LM485	Bacteria	Firmicutes	Clostridia	Peptococcales	Peptococcaceae	Other <1%
ASV 8	0.000162443	UIC111	chow LM485	Bacteria	Verrucomicrobiota	Verrucomicrobiae	Verrucomicrobiales	Akkermansiaceae	Other <1%
ASV 1016	0.000108295	UIC111	chow LM485	Bacteria	Firmicutes	Clostridia	Oscillospirales	Ruminococcaceae	Other <1%
ASV 1032	0.000108295	UIC111	chow LM485	Bacteria	Firmicutes	Clostridia	Lachnospirales	Lachnospiraceae	Other <1%
ASV 1160	0.000108295	UIC111	chow LM485	Bacteria	Firmicutes	Clostridia	c__ Clostridia	c__ Clostridia	Other <1%
ASV 174	0.000108295	UIC111	chow LM485	Bacteria	Firmicutes	Clostridia	Lachnospirales	Lachnospiraceae	Other <1%
ASV 405	0.000108295	UIC111	chow LM485	Bacteria	Firmicutes	Clostridia	Peptostreptococcales-Tissierellales	Anaerovoracaceae	Other <1%
ASV 419	0.000108295	UIC111	chow LM485	Bacteria	Firmicutes	Bacilli	Erysipelotrichales	Erysipelatoclostridiaceae	Other <1%
ASV 663	0.000108295	UIC111	chow LM485	Bacteria	Firmicutes	Clostridia	Lachnospirales	Lachnospiraceae	Other <1%
ASV 85	0.000108295	UIC111	chow LM485	Bacteria	Firmicutes	Clostridia	Oscillospirales	Oscillospiraceae	Other <1%
ASV 982	0.000108295	UIC111	chow LM485	Bacteria	Firmicutes	Clostridia	Lachnospirales	Lachnospiraceae	Other <1%
ASV 1155	5.41477e-05	UIC111	chow LM485	Bacteria	Firmicutes	Clostridia	Lachnospirales	Lachnospiraceae	Other <1%
ASV 1180	5.41477e-05	UIC111	chow LM485	Bacteria	Firmicutes	Firmicutes	c__ Firmicutes	c__ Firmicutes	Other <1%
ASV 1181	5.41477e-05	UIC111	chow LM485	Bacteria	Bacteroidota	Bacteroidia	Bacteroidales	Tannerellaceae	Other <1%
ASV 1454	5.41477e-05	UIC111	chow LM485	Bacteria	Bacteroidota	Bacteroidia	Bacteroidales	Tannerellaceae	Other <1%
ASV 1457	5.41477e-05	UIC111	chow LM485	Bacteria	Firmicutes	Bacilli	c__ Bacilli	c__ Bacilli	Other <1%
ASV 169	5.41477e-05	UIC111	chow LM485	Bacteria	Firmicutes	Clostridia	Oscillospirales	Oscillospiraceae	Other <1%
ASV 2	5.41477e-05	UIC111	chow LM485	Bacteria	Proteobacteria	Gammaproteobacteria	Enterobacterales	Enterobacteriaceae	Other <1%
ASV 5	5.41477e-05	UIC111	chow LM485	Bacteria	Firmicutes	Bacilli	Erysipelotrichales	Erysipelotrichaceae	Other <1%
ASV 608	5.41477e-05	UIC111	chow LM485	Bacteria	Firmicutes	Clostridia	Oscillospirales	Butyricicoccaceae	Other <1%
ASV 661	5.41477e-05	UIC111	chow LM485	Bacteria	Firmicutes	Clostridia	Peptostreptococcales-Tissierellales	Anaerovoracaceae	Other <1%
ASV 737	5.41477e-05	UIC111	chow LM485	Bacteria	Firmicutes	Clostridia	Oscillospirales	Ruminococcaceae	Other <1%
ASV 742	5.41477e-05	UIC111	chow LM485	Bacteria	Cyanobacteria	Cyanobacteriia	Chloroplast	Chloroplast	Other <1%
ASV 921	5.41477e-05	UIC111	chow LM485	Bacteria	Proteobacteria	Alphaproteobacteria	Rickettsiales	Mitochondria	Other <1%
