# Supplementary material for: Fungal xenosiderophores from mycobiota and diet promote Salmonella colonization of the inflamed gut
Source: Research Square preprint supplement (doi:10.21203/rs.3.rs-1175303/v1), 2022-01-05
Supplement: Supplementary file 5 [file eb9245be1926ce61bcb61960.xlsx]

## Sheet: Sheet1
Relative abundance 16S mice fed chow LM485 to chow 2914 (related to figure 2H)
OTU	Abundance	Mouse	Diet	Kingdom	Phylum	Class	Order	Family	Genus
ASV 1	0.219604	UIC127	chow LM485	Bacteria	Firmicutes	Bacilli	Lactobacillales	Lactobacillaceae	Lactobacillus
ASV 4	0.216844	UIC127	chow LM485	Bacteria	Bacteroidota	Bacteroidia	Bacteroidales	Muribaculaceae	f__ Muribaculaceae
ASV 3	0.183318	UIC127	chow LM485	Bacteria	Firmicutes	Bacilli	Erysipelotrichales	Erysipelotrichaceae	Turicibacter
ASV 5	0.104618	UIC127	chow LM485	Bacteria	Firmicutes	Bacilli	Erysipelotrichales	Erysipelotrichaceae	Dubosiella
ASV 7	0.0659755	UIC127	chow LM485	Bacteria	Bacteroidota	Bacteroidia	Bacteroidales	Bacteroidaceae	Bacteroides
ASV 8	0.0519052	UIC127	chow LM485	Bacteria	Verrucomicrobiota	Verrucomicrobiae	Verrucomicrobiales	Akkermansiaceae	Akkermansia
ASV 30	0.0358826	UIC127	chow LM485	Bacteria	Bacteroidota	Bacteroidia	Bacteroidales	Rikenellaceae	Alistipes
ASV 15	0.0236973	UIC127	chow LM485	Bacteria	Proteobacteria	Gammaproteobacteria	Burkholderiales	Sutterellaceae	Parasutterella
ASV 43	0.0145415	UIC127	chow LM485	Bacteria	Firmicutes	Clostridia	Clostridia UCG-014	o__ Clostridia UCG-014	o__ Clostridia UCG-014
ASV 50	0.0101656	UIC127	chow LM485	Bacteria	Firmicutes	Clostridia	Monoglobales	Monoglobaceae	Monoglobus
ASV 137	0.00908846	UIC127	chow LM485	Bacteria	Firmicutes	Clostridia	Lachnospirales	Lachnospiraceae	Other <1%
ASV 10	0.00787667	UIC127	chow LM485	Bacteria	Firmicutes	Clostridia	Peptostreptococcales-Tissierellales	Peptostreptococcaceae	Other <1%
ASV 27	0.00626094	UIC127	chow LM485	Bacteria	Actinobacteriota	Coriobacteriia	Coriobacteriales	Atopobiaceae	Other <1%
ASV 83	0.00410664	UIC127	chow LM485	Bacteria	Firmicutes	Clostridia	Lachnospirales	Lachnospiraceae	Other <1%
ASV 266	0.00356806	UIC127	chow LM485	Bacteria	Firmicutes	Clostridia	Lachnospirales	Lachnospiraceae	Other <1%
ASV 69	0.0033661	UIC127	chow LM485	Bacteria	Actinobacteriota	Coriobacteriia	Coriobacteriales	Eggerthellaceae	Other <1%
ASV 32	0.00329877	UIC127	chow LM485	Bacteria	Firmicutes	Clostridia	Clostridiales	Clostridiaceae	Other <1%
ASV 73	0.00302949	UIC127	chow LM485	Bacteria	Actinobacteriota	Coriobacteriia	Coriobacteriales	Eggerthellaceae	Other <1%
ASV 130	0.00296217	UIC127	chow LM485	Bacteria	Firmicutes	Clostridia	Lachnospirales	Lachnospiraceae	Other <1%
ASV 406	0.00235627	UIC127	chow LM485	Bacteria	Firmicutes	Clostridia	Lachnospirales	Lachnospiraceae	Other <1%
ASV 118	0.00222162	UIC127	chow LM485	Bacteria	Firmicutes	Clostridia	Oscillospirales	UCG-010	Other <1%
ASV 44	0.00208698	UIC127	chow LM485	Bacteria	Actinobacteriota	Coriobacteriia	Coriobacteriales	Eggerthellaceae	Other <1%
ASV 234	0.00195234	UIC127	chow LM485	Bacteria	Firmicutes	Clostridia	Oscillospirales	Oscillospiraceae	Other <1%
ASV 315	0.00195234	UIC127	chow LM485	Bacteria	Firmicutes	Clostridia	Oscillospirales	Oscillospiraceae	Other <1%
ASV 437	0.00195234	UIC127	chow LM485	Bacteria	Firmicutes	Clostridia	Lachnospirales	Lachnospiraceae	Other <1%
ASV 386	0.00141376	UIC127	chow LM485	Bacteria	Firmicutes	Bacilli	RF39	o__ RF39	Other <1%
ASV 141	0.00134644	UIC127	chow LM485	Bacteria	Firmicutes	Clostridia	Lachnospirales	Lachnospiraceae	Other <1%
ASV 56	0.00134644	UIC127	chow LM485	Bacteria	Firmicutes	Clostridia	Lachnospirales	Lachnospiraceae	Other <1%
ASV 264	0.00121179	UIC127	chow LM485	Bacteria	Firmicutes	Bacilli	Erysipelotrichales	Erysipelotrichaceae	Other <1%
ASV 176	0.00114447	UIC127	chow LM485	Bacteria	Firmicutes	Clostridia	Oscillospirales	Ruminococcaceae	Other <1%
ASV 228	0.00114447	UIC127	chow LM485	Bacteria	Firmicutes	Clostridia	Lachnospirales	Lachnospiraceae	Other <1%
ASV 199	0.00100983	UIC127	chow LM485	Bacteria	Firmicutes	Bacilli	c__ Bacilli	c__ Bacilli	Other <1%
ASV 131	0.000875185	UIC127	chow LM485	Bacteria	Firmicutes	Clostridia	Lachnospirales	Defluviitaleaceae	Other <1%
ASV 186	0.000740541	UIC127	chow LM485	Bacteria	Firmicutes	Clostridia	Oscillospirales	Ruminococcaceae	Other <1%
ASV 37	0.000673219	UIC127	chow LM485	Bacteria	Firmicutes	Bacilli	Staphylococcales	Staphylococcaceae	Other <1%
ASV 324	0.000471254	UIC127	chow LM485	Bacteria	Firmicutes	Clostridia	Clostridia vadinBB60 group	o__ Clostridia vadinBB60 group	Other <1%
ASV 328	0.000471254	UIC127	chow LM485	Bacteria	Firmicutes	Clostridia	Peptostreptococcales-Tissierellales	Peptostreptococcaceae	Other <1%
ASV 28	0.000403932	UIC127	chow LM485	Bacteria	Firmicutes	Bacilli	Erysipelotrichales	Erysipelatoclostridiaceae	Other <1%
ASV 364	0.000403932	UIC127	chow LM485	Bacteria	Firmicutes	Bacilli	Acholeplasmatales	Acholeplasmataceae	Other <1%
ASV 439	0.000403932	UIC127	chow LM485	Bacteria	Firmicutes	Clostridia	Oscillospirales	Oscillospiraceae	Other <1%
ASV 96	0.000403932	UIC127	chow LM485	Bacteria	Firmicutes	Clostridia	Lachnospirales	Lachnospiraceae	Other <1%
ASV 169	0.00033661	UIC127	chow LM485	Bacteria	Firmicutes	Clostridia	Oscillospirales	Oscillospiraceae	Other <1%
ASV 294	0.00033661	UIC127	chow LM485	Bacteria	Firmicutes	Clostridia	Lachnospirales	Lachnospiraceae	Other <1%
ASV 582	0.00033661	UIC127	chow LM485	Bacteria	Firmicutes	Clostridia	Lachnospirales	Lachnospiraceae	Other <1%
ASV 6	0.00033661	UIC127	chow LM485	Bacteria	Firmicutes	Bacilli	Lactobacillales	Streptococcaceae	Other <1%
ASV 635	0.00033661	UIC127	chow LM485	Bacteria	Firmicutes	Clostridia	Lachnospirales	Lachnospiraceae	Other <1%
ASV 800	0.00033661	UIC127	chow LM485	Bacteria	Firmicutes	Clostridia	Oscillospirales	Ruminococcaceae	Other <1%
ASV 1184	0.000201966	UIC127	chow LM485	Bacteria	Actinobacteriota	Coriobacteriia	Coriobacteriales	Coriobacteriales Incertae Sedis	Other <1%
ASV 188	0.000201966	UIC127	chow LM485	Bacteria	Actinobacteriota	Actinobacteria	Bifidobacteriales	Bifidobacteriaceae	Other <1%
ASV 824	0.000201966	UIC127	chow LM485	Bacteria	Firmicutes	Clostridia	Peptococcales	Peptococcaceae	Other <1%
ASV 1130	0.000134644	UIC127	chow LM485	Bacteria	Proteobacteria	Alphaproteobacteria	Rickettsiales	Mitochondria	Other <1%
ASV 1149	0.000134644	UIC127	chow LM485	Bacteria	Firmicutes	Clostridia	Lachnospirales	Lachnospiraceae	Other <1%
ASV 13	0.000134644	UIC127	chow LM485	Bacteria	Firmicutes	Bacilli	Lactobacillales	Enterococcaceae	Other <1%
ASV 543	0.000134644	UIC127	chow LM485	Bacteria	Firmicutes	Bacilli	Erysipelotrichales	Erysipelatoclostridiaceae	Other <1%
ASV 644	0.000134644	UIC127	chow LM485	Bacteria	Firmicutes	Clostridia	Peptostreptococcales-Tissierellales	Peptostreptococcaceae	Other <1%
ASV 101	6.73219e-05	UIC127	chow LM485	Bacteria	Firmicutes	Clostridia	Oscillospirales	[Eubacterium] coprostanoligenes group	Other <1%
ASV 1032	6.73219e-05	UIC127	chow LM485	Bacteria	Firmicutes	Clostridia	Lachnospirales	Lachnospiraceae	Other <1%
ASV 1223	6.73219e-05	UIC127	chow LM485	Bacteria	Proteobacteria	Gammaproteobacteria	Burkholderiales	Alcaligenaceae	Other <1%
ASV 1225	6.73219e-05	UIC127	chow LM485	Bacteria	Firmicutes	Clostridia	c__ Clostridia	c__ Clostridia	Other <1%
ASV 133	6.73219e-05	UIC127	chow LM485	Bacteria	Firmicutes	Clostridia	Peptostreptococcales-Tissierellales	Anaerovoracaceae	Other <1%
ASV 1405	6.73219e-05	UIC127	chow LM485	Bacteria	Firmicutes	Firmicutes	c__ Firmicutes	c__ Firmicutes	Other <1%
ASV 506	6.73219e-05	UIC127	chow LM485	Bacteria	Firmicutes	Clostridia	Lachnospirales	Lachnospiraceae	Other <1%
ASV 608	6.73219e-05	UIC127	chow LM485	Bacteria	Firmicutes	Clostridia	Oscillospirales	Butyricicoccaceae	Other <1%
ASV 742	6.73219e-05	UIC127	chow LM485	Bacteria	Cyanobacteria	Cyanobacteriia	Chloroplast	Chloroplast	Other <1%
ASV 1	0.322209	UIC127	chow 2914	Bacteria	Firmicutes	Bacilli	Lactobacillales	Lactobacillaceae	Lactobacillus
ASV 4	0.211366	UIC127	chow 2914	Bacteria	Bacteroidota	Bacteroidia	Bacteroidales	Muribaculaceae	f__ Muribaculaceae
ASV 3	0.186701	UIC127	chow 2914	Bacteria	Firmicutes	Bacilli	Erysipelotrichales	Erysipelotrichaceae	Turicibacter
ASV 5	0.0493809	UIC127	chow 2914	Bacteria	Firmicutes	Bacilli	Erysipelotrichales	Erysipelotrichaceae	Dubosiella
ASV 43	0.0358401	UIC127	chow 2914	Bacteria	Firmicutes	Clostridia	Clostridia UCG-014	o__ Clostridia UCG-014	o__ Clostridia UCG-014
ASV 30	0.03433	UIC127	chow 2914	Bacteria	Bacteroidota	Bacteroidia	Bacteroidales	Rikenellaceae	Alistipes
ASV 8	0.0338266	UIC127	chow 2914	Bacteria	Verrucomicrobiota	Verrucomicrobiae	Verrucomicrobiales	Akkermansiaceae	Akkermansia
ASV 15	0.0248163	UIC127	chow 2914	Bacteria	Proteobacteria	Gammaproteobacteria	Burkholderiales	Sutterellaceae	Parasutterella
ASV 7	0.0179704	UIC127	chow 2914	Bacteria	Bacteroidota	Bacteroidia	Bacteroidales	Bacteroidaceae	Bacteroides
ASV 37	0.0112252	UIC127	chow 2914	Bacteria	Firmicutes	Bacilli	Staphylococcales	Staphylococcaceae	Staphylococcus
ASV 69	0.00926206	UIC127	chow 2914	Bacteria	Actinobacteriota	Coriobacteriia	Coriobacteriales	Eggerthellaceae	Other <1%
ASV 32	0.00815464	UIC127	chow 2914	Bacteria	Firmicutes	Clostridia	Clostridiales	Clostridiaceae	Other <1%
ASV 101	0.00699688	UIC127	chow 2914	Bacteria	Firmicutes	Clostridia	Oscillospirales	[Eubacterium] coprostanoligenes group	Other <1%
ASV 130	0.00684587	UIC127	chow 2914	Bacteria	Firmicutes	Clostridia	Lachnospirales	Lachnospiraceae	Other <1%
ASV 10	0.00392631	UIC127	chow 2914	Bacteria	Firmicutes	Clostridia	Peptostreptococcales-Tissierellales	Peptostreptococcaceae	Other <1%
ASV 73	0.00377529	UIC127	chow 2914	Bacteria	Actinobacteriota	Coriobacteriia	Coriobacteriales	Eggerthellaceae	Other <1%
ASV 50	0.00286922	UIC127	chow 2914	Bacteria	Firmicutes	Clostridia	Monoglobales	Monoglobaceae	Other <1%
ASV 44	0.00236585	UIC127	chow 2914	Bacteria	Actinobacteriota	Coriobacteriia	Coriobacteriales	Eggerthellaceae	Other <1%
ASV 56	0.00231551	UIC127	chow 2914	Bacteria	Firmicutes	Clostridia	Lachnospirales	Lachnospiraceae	Other <1%
ASV 137	0.00221484	UIC127	chow 2914	Bacteria	Firmicutes	Clostridia	Lachnospirales	Lachnospiraceae	Other <1%
ASV 386	0.00206383	UIC127	chow 2914	Bacteria	Firmicutes	Bacilli	RF39	o__ RF39	Other <1%
ASV 437	0.00166113	UIC127	chow 2914	Bacteria	Firmicutes	Clostridia	Lachnospirales	Lachnospiraceae	Other <1%
ASV 118	0.00156046	UIC127	chow 2914	Bacteria	Firmicutes	Clostridia	Oscillospirales	UCG-010	Other <1%
ASV 264	0.00156046	UIC127	chow 2914	Bacteria	Firmicutes	Bacilli	Erysipelotrichales	Erysipelotrichaceae	Other <1%
ASV 315	0.00151012	UIC127	chow 2914	Bacteria	Firmicutes	Clostridia	Oscillospirales	Oscillospiraceae	Other <1%
ASV 186	0.00135911	UIC127	chow 2914	Bacteria	Firmicutes	Clostridia	Oscillospirales	Ruminococcaceae	Other <1%
ASV 800	0.00125843	UIC127	chow 2914	Bacteria	Firmicutes	Clostridia	Oscillospirales	Ruminococcaceae	Other <1%
ASV 582	0.00115776	UIC127	chow 2914	Bacteria	Firmicutes	Clostridia	Lachnospirales	Lachnospiraceae	Other <1%
ASV 131	0.00105708	UIC127	chow 2914	Bacteria	Firmicutes	Clostridia	Lachnospirales	Defluviitaleaceae	Other <1%
ASV 199	0.00105708	UIC127	chow 2914	Bacteria	Firmicutes	Bacilli	c__ Bacilli	c__ Bacilli	Other <1%
ASV 83	0.000956408	UIC127	chow 2914	Bacteria	Firmicutes	Clostridia	Lachnospirales	Lachnospiraceae	Other <1%
ASV 364	0.000906071	UIC127	chow 2914	Bacteria	Firmicutes	Bacilli	Acholeplasmatales	Acholeplasmataceae	Other <1%
ASV 141	0.000704722	UIC127	chow 2914	Bacteria	Firmicutes	Clostridia	Lachnospirales	Lachnospiraceae	Other <1%
ASV 188	0.000704722	UIC127	chow 2914	Bacteria	Actinobacteriota	Actinobacteria	Bifidobacteriales	Bifidobacteriaceae	Other <1%
ASV 439	0.000604047	UIC127	chow 2914	Bacteria	Firmicutes	Clostridia	Oscillospirales	Oscillospiraceae	Other <1%
ASV 324	0.000503373	UIC127	chow 2914	Bacteria	Firmicutes	Clostridia	Clostridia vadinBB60 group	o__ Clostridia vadinBB60 group	Other <1%
ASV 406	0.000503373	UIC127	chow 2914	Bacteria	Firmicutes	Clostridia	Lachnospirales	Lachnospiraceae	Other <1%
ASV 737	0.000503373	UIC127	chow 2914	Bacteria	Firmicutes	Clostridia	Oscillospirales	Ruminococcaceae	Other <1%
ASV 96	0.000503373	UIC127	chow 2914	Bacteria	Firmicutes	Clostridia	Lachnospirales	Lachnospiraceae	Other <1%
ASV 543	0.000453035	UIC127	chow 2914	Bacteria	Firmicutes	Bacilli	Erysipelotrichales	Erysipelatoclostridiaceae	Other <1%
ASV 169	0.000302024	UIC127	chow 2914	Bacteria	Firmicutes	Clostridia	Oscillospirales	Oscillospiraceae	Other <1%
ASV 328	0.000302024	UIC127	chow 2914	Bacteria	Firmicutes	Clostridia	Peptostreptococcales-Tissierellales	Peptostreptococcaceae	Other <1%
ASV 133	0.000251686	UIC127	chow 2914	Bacteria	Firmicutes	Clostridia	Peptostreptococcales-Tissierellales	Anaerovoracaceae	Other <1%
ASV 228	0.000251686	UIC127	chow 2914	Bacteria	Firmicutes	Clostridia	Lachnospirales	Lachnospiraceae	Other <1%
ASV 234	0.000251686	UIC127	chow 2914	Bacteria	Firmicutes	Clostridia	Oscillospirales	Oscillospiraceae	Other <1%
ASV 663	0.000201349	UIC127	chow 2914	Bacteria	Firmicutes	Clostridia	Lachnospirales	Lachnospiraceae	Other <1%
ASV 1225	0.000151012	UIC127	chow 2914	Bacteria	Firmicutes	Clostridia	c__ Clostridia	c__ Clostridia	Other <1%
ASV 1372	0.000151012	UIC127	chow 2914	Bacteria	Firmicutes	Clostridia	Oscillospirales	o__ Oscillospirales	Other <1%
ASV 635	0.000151012	UIC127	chow 2914	Bacteria	Firmicutes	Clostridia	Lachnospirales	Lachnospiraceae	Other <1%
ASV 1184	0.000100675	UIC127	chow 2914	Bacteria	Actinobacteriota	Coriobacteriia	Coriobacteriales	Coriobacteriales Incertae Sedis	Other <1%
ASV 176	0.000100675	UIC127	chow 2914	Bacteria	Firmicutes	Clostridia	Oscillospirales	Ruminococcaceae	Other <1%
ASV 28	0.000100675	UIC127	chow 2914	Bacteria	Firmicutes	Bacilli	Erysipelotrichales	Erysipelatoclostridiaceae	Other <1%
ASV 405	0.000100675	UIC127	chow 2914	Bacteria	Firmicutes	Clostridia	Peptostreptococcales-Tissierellales	Anaerovoracaceae	Other <1%
ASV 608	0.000100675	UIC127	chow 2914	Bacteria	Firmicutes	Clostridia	Oscillospirales	Butyricicoccaceae	Other <1%
ASV 1067	5.03373e-05	UIC127	chow 2914	Bacteria	Firmicutes	Clostridia	Oscillospirales	Ruminococcaceae	Other <1%
ASV 1108	5.03373e-05	UIC127	chow 2914	Bacteria	Firmicutes	Clostridia	Peptostreptococcales-Tissierellales	Anaerovoracaceae	Other <1%
ASV 1130	5.03373e-05	UIC127	chow 2914	Bacteria	Proteobacteria	Alphaproteobacteria	Rickettsiales	Mitochondria	Other <1%
ASV 1181	5.03373e-05	UIC127	chow 2914	Bacteria	Bacteroidota	Bacteroidia	Bacteroidales	Tannerellaceae	Other <1%
ASV 1275	5.03373e-05	UIC127	chow 2914	Bacteria	Firmicutes	Clostridia	Lachnospirales	Lachnospiraceae	Other <1%
ASV 2	5.03373e-05	UIC127	chow 2914	Bacteria	Proteobacteria	Gammaproteobacteria	Enterobacterales	Enterobacteriaceae	Other <1%
ASV 506	5.03373e-05	UIC127	chow 2914	Bacteria	Firmicutes	Clostridia	Lachnospirales	Lachnospiraceae	Other <1%
ASV 644	5.03373e-05	UIC127	chow 2914	Bacteria	Firmicutes	Clostridia	Peptostreptococcales-Tissierellales	Peptostreptococcaceae	Other <1%
ASV 661	5.03373e-05	UIC127	chow 2914	Bacteria	Firmicutes	Clostridia	Peptostreptococcales-Tissierellales	Anaerovoracaceae	Other <1%
ASV 824	5.03373e-05	UIC127	chow 2914	Bacteria	Firmicutes	Clostridia	Peptococcales	Peptococcaceae	Other <1%
ASV 1	0.224217	UIC128	chow LM485	Bacteria	Firmicutes	Bacilli	Lactobacillales	Lactobacillaceae	Lactobacillus
ASV 3	0.208936	UIC128	chow LM485	Bacteria	Firmicutes	Bacilli	Erysipelotrichales	Erysipelotrichaceae	Turicibacter
ASV 4	0.196386	UIC128	chow LM485	Bacteria	Bacteroidota	Bacteroidia	Bacteroidales	Muribaculaceae	f__ Muribaculaceae
ASV 5	0.10197	UIC128	chow LM485	Bacteria	Firmicutes	Bacilli	Erysipelotrichales	Erysipelotrichaceae	Dubosiella
ASV 30	0.0694904	UIC128	chow LM485	Bacteria	Bacteroidota	Bacteroidia	Bacteroidales	Rikenellaceae	Alistipes
ASV 8	0.0549067	UIC128	chow LM485	Bacteria	Verrucomicrobiota	Verrucomicrobiae	Verrucomicrobiales	Akkermansiaceae	Akkermansia
ASV 15	0.0246354	UIC128	chow LM485	Bacteria	Proteobacteria	Gammaproteobacteria	Burkholderiales	Sutterellaceae	Parasutterella
ASV 7	0.0213817	UIC128	chow LM485	Bacteria	Bacteroidota	Bacteroidia	Bacteroidales	Bacteroidaceae	Bacteroides
ASV 10	0.0141189	UIC128	chow LM485	Bacteria	Firmicutes	Clostridia	Peptostreptococcales-Tissierellales	Peptostreptococcaceae	Romboutsia
ASV 43	0.0139446	UIC128	chow LM485	Bacteria	Firmicutes	Clostridia	Clostridia UCG-014	o__ Clostridia UCG-014	o__ Clostridia UCG-014
ASV 130	0.0132473	UIC128	chow LM485	Bacteria	Firmicutes	Clostridia	Lachnospirales	Lachnospiraceae	Lachnospiraceae NK4A136 group
ASV 137	0.007379	UIC128	chow LM485	Bacteria	Firmicutes	Clostridia	Lachnospirales	Lachnospiraceae	Other <1%
ASV 386	0.00441578	UIC128	chow LM485	Bacteria	Firmicutes	Bacilli	RF39	o__ RF39	Other <1%
ASV 83	0.00418337	UIC128	chow LM485	Bacteria	Firmicutes	Clostridia	Lachnospirales	Lachnospiraceae	Other <1%
ASV 69	0.00383476	UIC128	chow LM485	Bacteria	Actinobacteriota	Coriobacteriia	Coriobacteriales	Eggerthellaceae	Other <1%
ASV 315	0.00273081	UIC128	chow LM485	Bacteria	Firmicutes	Clostridia	Oscillospirales	Oscillospiraceae	Other <1%
ASV 73	0.00273081	UIC128	chow LM485	Bacteria	Actinobacteriota	Coriobacteriia	Coriobacteriales	Eggerthellaceae	Other <1%
ASV 264	0.0024403	UIC128	chow LM485	Bacteria	Firmicutes	Bacilli	Erysipelotrichales	Erysipelotrichaceae	Other <1%
ASV 199	0.00197548	UIC128	chow LM485	Bacteria	Firmicutes	Bacilli	c__ Bacilli	c__ Bacilli	Other <1%
ASV 44	0.00191738	UIC128	chow LM485	Bacteria	Actinobacteriota	Coriobacteriia	Coriobacteriales	Eggerthellaceae	Other <1%
ASV 406	0.00180117	UIC128	chow LM485	Bacteria	Firmicutes	Clostridia	Lachnospirales	Lachnospiraceae	Other <1%
ASV 118	0.00168497	UIC128	chow LM485	Bacteria	Firmicutes	Clostridia	Oscillospirales	UCG-010	Other <1%
ASV 32	0.00168497	UIC128	chow LM485	Bacteria	Firmicutes	Clostridia	Clostridiales	Clostridiaceae	Other <1%
ASV 324	0.00162687	UIC128	chow LM485	Bacteria	Firmicutes	Clostridia	Clostridia vadinBB60 group	o__ Clostridia vadinBB60 group	Other <1%
ASV 56	0.00151066	UIC128	chow LM485	Bacteria	Firmicutes	Clostridia	Lachnospirales	Lachnospiraceae	Other <1%
ASV 228	0.00145256	UIC128	chow LM485	Bacteria	Firmicutes	Clostridia	Lachnospirales	Lachnospiraceae	Other <1%
ASV 96	0.00145256	UIC128	chow LM485	Bacteria	Firmicutes	Clostridia	Lachnospirales	Lachnospiraceae	Other <1%
ASV 131	0.00139446	UIC128	chow LM485	Bacteria	Firmicutes	Clostridia	Lachnospirales	Defluviitaleaceae	Other <1%
ASV 439	0.00116205	UIC128	chow LM485	Bacteria	Firmicutes	Clostridia	Oscillospirales	Oscillospiraceae	Other <1%
ASV 234	0.00110395	UIC128	chow LM485	Bacteria	Firmicutes	Clostridia	Oscillospirales	Oscillospiraceae	Other <1%
ASV 176	0.00098774	UIC128	chow LM485	Bacteria	Firmicutes	Clostridia	Oscillospirales	Ruminococcaceae	Other <1%
ASV 328	0.000929638	UIC128	chow LM485	Bacteria	Firmicutes	Clostridia	Peptostreptococcales-Tissierellales	Peptostreptococcaceae	Other <1%
ASV 141	0.000871536	UIC128	chow LM485	Bacteria	Firmicutes	Clostridia	Lachnospirales	Lachnospiraceae	Other <1%
ASV 28	0.000755331	UIC128	chow LM485	Bacteria	Firmicutes	Bacilli	Erysipelotrichales	Erysipelatoclostridiaceae	Other <1%
ASV 364	0.000639126	UIC128	chow LM485	Bacteria	Firmicutes	Bacilli	Acholeplasmatales	Acholeplasmataceae	Other <1%
ASV 169	0.000581024	UIC128	chow LM485	Bacteria	Firmicutes	Clostridia	Oscillospirales	Oscillospiraceae	Other <1%
ASV 186	0.000581024	UIC128	chow LM485	Bacteria	Firmicutes	Clostridia	Oscillospirales	Ruminococcaceae	Other <1%
ASV 506	0.000522921	UIC128	chow LM485	Bacteria	Firmicutes	Clostridia	Lachnospirales	Lachnospiraceae	Other <1%
ASV 644	0.000464819	UIC128	chow LM485	Bacteria	Firmicutes	Clostridia	Peptostreptococcales-Tissierellales	Peptostreptococcaceae	Other <1%
ASV 437	0.000406717	UIC128	chow LM485	Bacteria	Firmicutes	Clostridia	Lachnospirales	Lachnospiraceae	Other <1%
ASV 800	0.000406717	UIC128	chow LM485	Bacteria	Firmicutes	Clostridia	Oscillospirales	Ruminococcaceae	Other <1%
ASV 188	0.000348614	UIC128	chow LM485	Bacteria	Actinobacteriota	Actinobacteria	Bifidobacteriales	Bifidobacteriaceae	Other <1%
ASV 266	0.000348614	UIC128	chow LM485	Bacteria	Firmicutes	Clostridia	Lachnospirales	Lachnospiraceae	Other <1%
ASV 50	0.000348614	UIC128	chow LM485	Bacteria	Firmicutes	Clostridia	Monoglobales	Monoglobaceae	Other <1%
ASV 582	0.000290512	UIC128	chow LM485	Bacteria	Firmicutes	Clostridia	Lachnospirales	Lachnospiraceae	Other <1%
ASV 101	0.000174307	UIC128	chow LM485	Bacteria	Firmicutes	Clostridia	Oscillospirales	[Eubacterium] coprostanoligenes group	Other <1%
ASV 1150	0.000174307	UIC128	chow LM485	Bacteria	Actinobacteriota	Coriobacteriia	Coriobacteriales	Eggerthellaceae	Other <1%
ASV 635	0.000174307	UIC128	chow LM485	Bacteria	Firmicutes	Clostridia	Lachnospirales	Lachnospiraceae	Other <1%
ASV 824	0.000174307	UIC128	chow LM485	Bacteria	Firmicutes	Clostridia	Peptococcales	Peptococcaceae	Other <1%
ASV 1184	0.000116205	UIC128	chow LM485	Bacteria	Actinobacteriota	Coriobacteriia	Coriobacteriales	Coriobacteriales Incertae Sedis	Other <1%
ASV 133	0.000116205	UIC128	chow LM485	Bacteria	Firmicutes	Clostridia	Peptostreptococcales-Tissierellales	Anaerovoracaceae	Other <1%
ASV 1405	0.000116205	UIC128	chow LM485	Bacteria	Firmicutes	Firmicutes	c__ Firmicutes	c__ Firmicutes	Other <1%
ASV 37	0.000116205	UIC128	chow LM485	Bacteria	Firmicutes	Bacilli	Staphylococcales	Staphylococcaceae	Other <1%
ASV 11	5.81024e-05	UIC128	chow LM485	Bacteria	Proteobacteria	Gammaproteobacteria	Enterobacterales	Enterobacteriaceae	Other <1%
ASV 1130	5.81024e-05	UIC128	chow LM485	Bacteria	Proteobacteria	Alphaproteobacteria	Rickettsiales	Mitochondria	Other <1%
ASV 1158	5.81024e-05	UIC128	chow LM485	Bacteria	Firmicutes	Bacilli	Erysipelotrichales	Erysipelotrichaceae	Other <1%
ASV 1225	5.81024e-05	UIC128	chow LM485	Bacteria	Firmicutes	Clostridia	c__ Clostridia	c__ Clostridia	Other <1%
ASV 1301	5.81024e-05	UIC128	chow LM485	Bacteria	Firmicutes	Bacilli	Lactobacillales	o__ Lactobacillales	Other <1%
ASV 1372	5.81024e-05	UIC128	chow LM485	Bacteria	Firmicutes	Clostridia	Oscillospirales	o__ Oscillospirales	Other <1%
ASV 1482	5.81024e-05	UIC128	chow LM485	Bacteria	Firmicutes	Clostridia	Lachnospirales	Lachnospiraceae	Other <1%
ASV 405	5.81024e-05	UIC128	chow LM485	Bacteria	Firmicutes	Clostridia	Peptostreptococcales-Tissierellales	Anaerovoracaceae	Other <1%
ASV 661	5.81024e-05	UIC128	chow LM485	Bacteria	Firmicutes	Clostridia	Peptostreptococcales-Tissierellales	Anaerovoracaceae	Other <1%
ASV 663	5.81024e-05	UIC128	chow LM485	Bacteria	Firmicutes	Clostridia	Lachnospirales	Lachnospiraceae	Other <1%
ASV 847	5.81024e-05	UIC128	chow LM485	Bacteria	Firmicutes	Clostridia	Oscillospirales	Oscillospiraceae	Other <1%
ASV 1	0.350543	UIC128	chow 2914	Bacteria	Firmicutes	Bacilli	Lactobacillales	Lactobacillaceae	Lactobacillus
ASV 4	0.206411	UIC128	chow 2914	Bacteria	Bacteroidota	Bacteroidia	Bacteroidales	Muribaculaceae	f__ Muribaculaceae
ASV 3	0.188055	UIC128	chow 2914	Bacteria	Firmicutes	Bacilli	Erysipelotrichales	Erysipelotrichaceae	Turicibacter
ASV 5	0.0543478	UIC128	chow 2914	Bacteria	Firmicutes	Bacilli	Erysipelotrichales	Erysipelotrichaceae	Dubosiella
ASV 30	0.0399845	UIC128	chow 2914	Bacteria	Bacteroidota	Bacteroidia	Bacteroidales	Rikenellaceae	Alistipes
ASV 8	0.0395408	UIC128	chow 2914	Bacteria	Verrucomicrobiota	Verrucomicrobiae	Verrucomicrobiales	Akkermansiaceae	Akkermansia
ASV 15	0.0241792	UIC128	chow 2914	Bacteria	Proteobacteria	Gammaproteobacteria	Burkholderiales	Sutterellaceae	Parasutterella
ASV 43	0.0217391	UIC128	chow 2914	Bacteria	Firmicutes	Clostridia	Clostridia UCG-014	o__ Clostridia UCG-014	o__ Clostridia UCG-014
ASV 130	0.0075976	UIC128	chow 2914	Bacteria	Firmicutes	Clostridia	Lachnospirales	Lachnospiraceae	Other <1%
ASV 69	0.00698758	UIC128	chow 2914	Bacteria	Actinobacteriota	Coriobacteriia	Coriobacteriales	Eggerthellaceae	Other <1%
ASV 32	0.0059339	UIC128	chow 2914	Bacteria	Firmicutes	Clostridia	Clostridiales	Clostridiaceae	Other <1%
ASV 7	0.00571207	UIC128	chow 2914	Bacteria	Bacteroidota	Bacteroidia	Bacteroidales	Bacteroidaceae	Other <1%
ASV 73	0.00510204	UIC128	chow 2914	Bacteria	Actinobacteriota	Coriobacteriia	Coriobacteriales	Eggerthellaceae	Other <1%
ASV 137	0.00460293	UIC128	chow 2914	Bacteria	Firmicutes	Clostridia	Lachnospirales	Lachnospiraceae	Other <1%
ASV 56	0.00338287	UIC128	chow 2914	Bacteria	Firmicutes	Clostridia	Lachnospirales	Lachnospiraceae	Other <1%
ASV 83	0.00255102	UIC128	chow 2914	Bacteria	Firmicutes	Clostridia	Lachnospirales	Lachnospiraceae	Other <1%
ASV 101	0.00238465	UIC128	chow 2914	Bacteria	Firmicutes	Clostridia	Oscillospirales	[Eubacterium] coprostanoligenes group	Other <1%
ASV 386	0.00210736	UIC128	chow 2914	Bacteria	Firmicutes	Bacilli	RF39	o__ RF39	Other <1%
ASV 582	0.00199645	UIC128	chow 2914	Bacteria	Firmicutes	Clostridia	Lachnospirales	Lachnospiraceae	Other <1%
ASV 324	0.00194099	UIC128	chow 2914	Bacteria	Firmicutes	Clostridia	Clostridia vadinBB60 group	o__ Clostridia vadinBB60 group	Other <1%
ASV 406	0.00188554	UIC128	chow 2914	Bacteria	Firmicutes	Clostridia	Lachnospirales	Lachnospiraceae	Other <1%
ASV 141	0.00171917	UIC128	chow 2914	Bacteria	Firmicutes	Clostridia	Lachnospirales	Lachnospiraceae	Other <1%
ASV 10	0.00160825	UIC128	chow 2914	Bacteria	Firmicutes	Clostridia	Peptostreptococcales-Tissierellales	Peptostreptococcaceae	Other <1%
ASV 44	0.00160825	UIC128	chow 2914	Bacteria	Actinobacteriota	Coriobacteriia	Coriobacteriales	Eggerthellaceae	Other <1%
ASV 37	0.0015528	UIC128	chow 2914	Bacteria	Firmicutes	Bacilli	Staphylococcales	Staphylococcaceae	Other <1%
ASV 118	0.00138642	UIC128	chow 2914	Bacteria	Firmicutes	Clostridia	Oscillospirales	UCG-010	Other <1%
ASV 264	0.00138642	UIC128	chow 2914	Bacteria	Firmicutes	Bacilli	Erysipelotrichales	Erysipelotrichaceae	Other <1%
ASV 315	0.00133097	UIC128	chow 2914	Bacteria	Firmicutes	Clostridia	Oscillospirales	Oscillospiraceae	Other <1%
ASV 199	0.00122005	UIC128	chow 2914	Bacteria	Firmicutes	Bacilli	c__ Bacilli	c__ Bacilli	Other <1%
ASV 228	0.000887311	UIC128	chow 2914	Bacteria	Firmicutes	Clostridia	Lachnospirales	Lachnospiraceae	Other <1%
ASV 800	0.000887311	UIC128	chow 2914	Bacteria	Firmicutes	Clostridia	Oscillospirales	Ruminococcaceae	Other <1%
ASV 131	0.000831854	UIC128	chow 2914	Bacteria	Firmicutes	Clostridia	Lachnospirales	Defluviitaleaceae	Other <1%
ASV 186	0.000776398	UIC128	chow 2914	Bacteria	Firmicutes	Clostridia	Oscillospirales	Ruminococcaceae	Other <1%
ASV 50	0.000776398	UIC128	chow 2914	Bacteria	Firmicutes	Clostridia	Monoglobales	Monoglobaceae	Other <1%
ASV 96	0.000776398	UIC128	chow 2914	Bacteria	Firmicutes	Clostridia	Lachnospirales	Lachnospiraceae	Other <1%
ASV 364	0.000720941	UIC128	chow 2914	Bacteria	Firmicutes	Bacilli	Acholeplasmatales	Acholeplasmataceae	Other <1%
ASV 28	0.00055457	UIC128	chow 2914	Bacteria	Firmicutes	Bacilli	Erysipelotrichales	Erysipelatoclostridiaceae	Other <1%
ASV 188	0.000499113	UIC128	chow 2914	Bacteria	Actinobacteriota	Actinobacteria	Bifidobacteriales	Bifidobacteriaceae	Other <1%
ASV 234	0.000499113	UIC128	chow 2914	Bacteria	Firmicutes	Clostridia	Oscillospirales	Oscillospiraceae	Other <1%
ASV 266	0.000443656	UIC128	chow 2914	Bacteria	Firmicutes	Clostridia	Lachnospirales	Lachnospiraceae	Other <1%
ASV 543	0.000388199	UIC128	chow 2914	Bacteria	Firmicutes	Bacilli	Erysipelotrichales	Erysipelatoclostridiaceae	Other <1%
ASV 1108	0.000332742	UIC128	chow 2914	Bacteria	Firmicutes	Clostridia	Peptostreptococcales-Tissierellales	Anaerovoracaceae	Other <1%
ASV 824	0.000277285	UIC128	chow 2914	Bacteria	Firmicutes	Clostridia	Peptococcales	Peptococcaceae	Other <1%
ASV 133	0.000221828	UIC128	chow 2914	Bacteria	Firmicutes	Clostridia	Peptostreptococcales-Tissierellales	Anaerovoracaceae	Other <1%
ASV 405	0.000221828	UIC128	chow 2914	Bacteria	Firmicutes	Clostridia	Peptostreptococcales-Tissierellales	Anaerovoracaceae	Other <1%
ASV 439	0.000221828	UIC128	chow 2914	Bacteria	Firmicutes	Clostridia	Oscillospirales	Oscillospiraceae	Other <1%
ASV 737	0.000221828	UIC128	chow 2914	Bacteria	Firmicutes	Clostridia	Oscillospirales	Ruminococcaceae	Other <1%
ASV 13	0.000166371	UIC128	chow 2914	Bacteria	Firmicutes	Bacilli	Lactobacillales	Enterococcaceae	Other <1%
ASV 27	0.000166371	UIC128	chow 2914	Bacteria	Actinobacteriota	Coriobacteriia	Coriobacteriales	Atopobiaceae	Other <1%
ASV 328	0.000166371	UIC128	chow 2914	Bacteria	Firmicutes	Clostridia	Peptostreptococcales-Tissierellales	Peptostreptococcaceae	Other <1%
ASV 661	0.000166371	UIC128	chow 2914	Bacteria	Firmicutes	Clostridia	Peptostreptococcales-Tissierellales	Anaerovoracaceae	Other <1%
ASV 85	0.000166371	UIC128	chow 2914	Bacteria	Firmicutes	Clostridia	Oscillospirales	Oscillospiraceae	Other <1%
ASV 1130	0.000110914	UIC128	chow 2914	Bacteria	Proteobacteria	Alphaproteobacteria	Rickettsiales	Mitochondria	Other <1%
ASV 1150	0.000110914	UIC128	chow 2914	Bacteria	Actinobacteriota	Coriobacteriia	Coriobacteriales	Eggerthellaceae	Other <1%
ASV 506	0.000110914	UIC128	chow 2914	Bacteria	Firmicutes	Clostridia	Lachnospirales	Lachnospiraceae	Other <1%
ASV 635	0.000110914	UIC128	chow 2914	Bacteria	Firmicutes	Clostridia	Lachnospirales	Lachnospiraceae	Other <1%
ASV 644	0.000110914	UIC128	chow 2914	Bacteria	Firmicutes	Clostridia	Peptostreptococcales-Tissierellales	Peptostreptococcaceae	Other <1%
ASV 1372	5.5457e-05	UIC128	chow 2914	Bacteria	Firmicutes	Clostridia	Oscillospirales	o__ Oscillospirales	Other <1%
ASV 1405	5.5457e-05	UIC128	chow 2914	Bacteria	Firmicutes	Firmicutes	c__ Firmicutes	c__ Firmicutes	Other <1%
ASV 2	5.5457e-05	UIC128	chow 2914	Bacteria	Proteobacteria	Gammaproteobacteria	Enterobacterales	Enterobacteriaceae	Other <1%
ASV 294	5.5457e-05	UIC128	chow 2914	Bacteria	Firmicutes	Clostridia	Lachnospirales	Lachnospiraceae	Other <1%
ASV 437	5.5457e-05	UIC128	chow 2914	Bacteria	Firmicutes	Clostridia	Lachnospirales	Lachnospiraceae	Other <1%
ASV 3	0.248613	UIC129	chow LM485	Bacteria	Firmicutes	Bacilli	Erysipelotrichales	Erysipelotrichaceae	Turicibacter
ASV 4	0.203878	UIC129	chow LM485	Bacteria	Bacteroidota	Bacteroidia	Bacteroidales	Muribaculaceae	f__ Muribaculaceae
ASV 1	0.19238	UIC129	chow LM485	Bacteria	Firmicutes	Bacilli	Lactobacillales	Lactobacillaceae	Lactobacillus
ASV 5	0.0763686	UIC129	chow LM485	Bacteria	Firmicutes	Bacilli	Erysipelotrichales	Erysipelotrichaceae	Dubosiella
ASV 30	0.0668726	UIC129	chow LM485	Bacteria	Bacteroidota	Bacteroidia	Bacteroidales	Rikenellaceae	Alistipes
ASV 8	0.0523997	UIC129	chow LM485	Bacteria	Verrucomicrobiota	Verrucomicrobiae	Verrucomicrobiales	Akkermansiaceae	Akkermansia
ASV 43	0.0309479	UIC129	chow LM485	Bacteria	Firmicutes	Clostridia	Clostridia UCG-014	o__ Clostridia UCG-014	o__ Clostridia UCG-014
ASV 7	0.0156742	UIC129	chow LM485	Bacteria	Bacteroidota	Bacteroidia	Bacteroidales	Bacteroidaceae	Bacteroides
ASV 130	0.0152737	UIC129	chow LM485	Bacteria	Firmicutes	Clostridia	Lachnospirales	Lachnospiraceae	Lachnospiraceae NK4A136 group
ASV 10	0.0132143	UIC129	chow LM485	Bacteria	Firmicutes	Clostridia	Peptostreptococcales-Tissierellales	Peptostreptococcaceae	Romboutsia
ASV 137	0.012013	UIC129	chow LM485	Bacteria	Firmicutes	Clostridia	Lachnospirales	Lachnospiraceae	f__ Lachnospiraceae
ASV 15	0.00938161	UIC129	chow LM485	Bacteria	Proteobacteria	Gammaproteobacteria	Burkholderiales	Sutterellaceae	Other <1%
ASV 83	0.00640696	UIC129	chow LM485	Bacteria	Firmicutes	Clostridia	Lachnospirales	Lachnospiraceae	Other <1%
ASV 69	0.00371832	UIC129	chow LM485	Bacteria	Actinobacteriota	Coriobacteriia	Coriobacteriales	Eggerthellaceae	Other <1%
ASV 406	0.00366112	UIC129	chow LM485	Bacteria	Firmicutes	Clostridia	Lachnospirales	Lachnospiraceae	Other <1%
ASV 315	0.0034323	UIC129	chow LM485	Bacteria	Firmicutes	Clostridia	Oscillospirales	Oscillospiraceae	Other <1%
ASV 228	0.00297466	UIC129	chow LM485	Bacteria	Firmicutes	Clostridia	Lachnospirales	Lachnospiraceae	Other <1%
ASV 73	0.00297466	UIC129	chow LM485	Bacteria	Actinobacteriota	Coriobacteriia	Coriobacteriales	Eggerthellaceae	Other <1%
ASV 37	0.00286025	UIC129	chow LM485	Bacteria	Firmicutes	Bacilli	Staphylococcales	Staphylococcaceae	Other <1%
ASV 234	0.00245981	UIC129	chow LM485	Bacteria	Firmicutes	Clostridia	Oscillospirales	Oscillospiraceae	Other <1%
ASV 141	0.00223099	UIC129	chow LM485	Bacteria	Firmicutes	Clostridia	Lachnospirales	Lachnospiraceae	Other <1%
ASV 437	0.00223099	UIC129	chow LM485	Bacteria	Firmicutes	Clostridia	Lachnospirales	Lachnospiraceae	Other <1%
ASV 324	0.00217379	UIC129	chow LM485	Bacteria	Firmicutes	Clostridia	Clostridia vadinBB60 group	o__ Clostridia vadinBB60 group	Other <1%
ASV 386	0.00211658	UIC129	chow LM485	Bacteria	Firmicutes	Bacilli	RF39	o__ RF39	Other <1%
ASV 118	0.00183056	UIC129	chow LM485	Bacteria	Firmicutes	Clostridia	Oscillospirales	UCG-010	Other <1%
ASV 32	0.00183056	UIC129	chow LM485	Bacteria	Firmicutes	Clostridia	Clostridiales	Clostridiaceae	Other <1%
ASV 96	0.00183056	UIC129	chow LM485	Bacteria	Firmicutes	Clostridia	Lachnospirales	Lachnospiraceae	Other <1%
ASV 176	0.00177335	UIC129	chow LM485	Bacteria	Firmicutes	Clostridia	Oscillospirales	Ruminococcaceae	Other <1%
ASV 28	0.00148733	UIC129	chow LM485	Bacteria	Firmicutes	Bacilli	Erysipelotrichales	Erysipelatoclostridiaceae	Other <1%
ASV 56	0.00148733	UIC129	chow LM485	Bacteria	Firmicutes	Clostridia	Lachnospirales	Lachnospiraceae	Other <1%
ASV 264	0.00143012	UIC129	chow LM485	Bacteria	Firmicutes	Bacilli	Erysipelotrichales	Erysipelotrichaceae	Other <1%
ASV 506	0.00137292	UIC129	chow LM485	Bacteria	Firmicutes	Clostridia	Lachnospirales	Lachnospiraceae	Other <1%
ASV 44	0.0012013	UIC129	chow LM485	Bacteria	Actinobacteriota	Coriobacteriia	Coriobacteriales	Eggerthellaceae	Other <1%
ASV 364	0.0011441	UIC129	chow LM485	Bacteria	Firmicutes	Bacilli	Acholeplasmatales	Acholeplasmataceae	Other <1%
ASV 582	0.00108689	UIC129	chow LM485	Bacteria	Firmicutes	Clostridia	Lachnospirales	Lachnospiraceae	Other <1%
ASV 101	0.00102969	UIC129	chow LM485	Bacteria	Firmicutes	Clostridia	Oscillospirales	[Eubacterium] coprostanoligenes group	Other <1%
ASV 186	0.00102969	UIC129	chow LM485	Bacteria	Firmicutes	Clostridia	Oscillospirales	Ruminococcaceae	Other <1%
ASV 800	0.00102969	UIC129	chow LM485	Bacteria	Firmicutes	Clostridia	Oscillospirales	Ruminococcaceae	Other <1%
ASV 199	0.000972484	UIC129	chow LM485	Bacteria	Firmicutes	Bacilli	c__ Bacilli	c__ Bacilli	Other <1%
ASV 439	0.000629255	UIC129	chow LM485	Bacteria	Firmicutes	Clostridia	Oscillospirales	Oscillospiraceae	Other <1%
ASV 266	0.000514845	UIC129	chow LM485	Bacteria	Firmicutes	Clostridia	Lachnospirales	Lachnospiraceae	Other <1%
ASV 328	0.000514845	UIC129	chow LM485	Bacteria	Firmicutes	Clostridia	Peptostreptococcales-Tissierellales	Peptostreptococcaceae	Other <1%
ASV 131	0.00045764	UIC129	chow LM485	Bacteria	Firmicutes	Clostridia	Lachnospirales	Defluviitaleaceae	Other <1%
ASV 169	0.000400435	UIC129	chow LM485	Bacteria	Firmicutes	Clostridia	Oscillospirales	Oscillospiraceae	Other <1%
ASV 661	0.000286025	UIC129	chow LM485	Bacteria	Firmicutes	Clostridia	Peptostreptococcales-Tissierellales	Anaerovoracaceae	Other <1%
ASV 1108	0.00022882	UIC129	chow LM485	Bacteria	Firmicutes	Clostridia	Peptostreptococcales-Tissierellales	Anaerovoracaceae	Other <1%
ASV 1405	0.000171615	UIC129	chow LM485	Bacteria	Firmicutes	Firmicutes	c__ Firmicutes	c__ Firmicutes	Other <1%
ASV 635	0.000171615	UIC129	chow LM485	Bacteria	Firmicutes	Clostridia	Lachnospirales	Lachnospiraceae	Other <1%
ASV 824	0.000171615	UIC129	chow LM485	Bacteria	Firmicutes	Clostridia	Peptococcales	Peptococcaceae	Other <1%
ASV 1150	0.00011441	UIC129	chow LM485	Bacteria	Actinobacteriota	Coriobacteriia	Coriobacteriales	Eggerthellaceae	Other <1%
ASV 1184	0.00011441	UIC129	chow LM485	Bacteria	Actinobacteriota	Coriobacteriia	Coriobacteriales	Coriobacteriales Incertae Sedis	Other <1%
ASV 1225	0.00011441	UIC129	chow LM485	Bacteria	Firmicutes	Clostridia	c__ Clostridia	c__ Clostridia	Other <1%
ASV 1401	0.00011441	UIC129	chow LM485	Bacteria	Firmicutes	Clostridia	Peptostreptococcales-Tissierellales	Anaerovoracaceae	Other <1%
ASV 50	0.00011441	UIC129	chow LM485	Bacteria	Firmicutes	Clostridia	Monoglobales	Monoglobaceae	Other <1%
ASV 644	0.00011441	UIC129	chow LM485	Bacteria	Firmicutes	Clostridia	Peptostreptococcales-Tissierellales	Peptostreptococcaceae	Other <1%
ASV 1016	5.7205e-05	UIC129	chow LM485	Bacteria	Firmicutes	Clostridia	Oscillospirales	Ruminococcaceae	Other <1%
ASV 1026	5.7205e-05	UIC129	chow LM485	Bacteria	Cyanobacteria	Cyanobacteriia	Chloroplast	o__ Chloroplast	Other <1%
ASV 1032	5.7205e-05	UIC129	chow LM485	Bacteria	Firmicutes	Clostridia	Lachnospirales	Lachnospiraceae	Other <1%
ASV 11	5.7205e-05	UIC129	chow LM485	Bacteria	Proteobacteria	Gammaproteobacteria	Enterobacterales	Enterobacteriaceae	Other <1%
ASV 1149	5.7205e-05	UIC129	chow LM485	Bacteria	Firmicutes	Clostridia	Lachnospirales	Lachnospiraceae	Other <1%
ASV 1275	5.7205e-05	UIC129	chow LM485	Bacteria	Firmicutes	Clostridia	Lachnospirales	Lachnospiraceae	Other <1%
ASV 13	5.7205e-05	UIC129	chow LM485	Bacteria	Firmicutes	Bacilli	Lactobacillales	Enterococcaceae	Other <1%
ASV 133	5.7205e-05	UIC129	chow LM485	Bacteria	Firmicutes	Clostridia	Peptostreptococcales-Tissierellales	Anaerovoracaceae	Other <1%
ASV 1504	5.7205e-05	UIC129	chow LM485	Bacteria	Proteobacteria	p__ Proteobacteria	p__ Proteobacteria	p__ Proteobacteria	Other <1%
ASV 27	5.7205e-05	UIC129	chow LM485	Bacteria	Actinobacteriota	Coriobacteriia	Coriobacteriales	Atopobiaceae	Other <1%
ASV 543	5.7205e-05	UIC129	chow LM485	Bacteria	Firmicutes	Bacilli	Erysipelotrichales	Erysipelatoclostridiaceae	Other <1%
ASV 6	5.7205e-05	UIC129	chow LM485	Bacteria	Firmicutes	Bacilli	Lactobacillales	Streptococcaceae	Other <1%
ASV 663	5.7205e-05	UIC129	chow LM485	Bacteria	Firmicutes	Clostridia	Lachnospirales	Lachnospiraceae	Other <1%
ASV 847	5.7205e-05	UIC129	chow LM485	Bacteria	Firmicutes	Clostridia	Oscillospirales	Oscillospiraceae	Other <1%
ASV 85	5.7205e-05	UIC129	chow LM485	Bacteria	Firmicutes	Clostridia	Oscillospirales	Oscillospiraceae	Other <1%
ASV 860	5.7205e-05	UIC129	chow LM485	Bacteria	Verrucomicrobiota	Verrucomicrobiae	Verrucomicrobiales	Verrucomicrobiaceae	Other <1%
ASV 883	5.7205e-05	UIC129	chow LM485	Bacteria	Firmicutes	Clostridia	Oscillospirales	Butyricicoccaceae	Other <1%
ASV 1	0.336668	UIC129	chow 2914	Bacteria	Firmicutes	Bacilli	Lactobacillales	Lactobacillaceae	Lactobacillus
ASV 4	0.185337	UIC129	chow 2914	Bacteria	Bacteroidota	Bacteroidia	Bacteroidales	Muribaculaceae	f__ Muribaculaceae
ASV 3	0.147653	UIC129	chow 2914	Bacteria	Firmicutes	Bacilli	Erysipelotrichales	Erysipelotrichaceae	Turicibacter
ASV 5	0.0574163	UIC129	chow 2914	Bacteria	Firmicutes	Bacilli	Erysipelotrichales	Erysipelotrichaceae	Dubosiella
ASV 15	0.0469374	UIC129	chow 2914	Bacteria	Proteobacteria	Gammaproteobacteria	Burkholderiales	Sutterellaceae	Parasutterella
ASV 30	0.0468979	UIC129	chow 2914	Bacteria	Bacteroidota	Bacteroidia	Bacteroidales	Rikenellaceae	Alistipes
ASV 130	0.0374076	UIC129	chow 2914	Bacteria	Firmicutes	Clostridia	Lachnospirales	Lachnospiraceae	Lachnospiraceae NK4A136 group
ASV 43	0.0183084	UIC129	chow 2914	Bacteria	Firmicutes	Clostridia	Clostridia UCG-014	o__ Clostridia UCG-014	o__ Clostridia UCG-014
ASV 8	0.0170034	UIC129	chow 2914	Bacteria	Verrucomicrobiota	Verrucomicrobiae	Verrucomicrobiales	Akkermansiaceae	Akkermansia
ASV 137	0.0161335	UIC129	chow 2914	Bacteria	Firmicutes	Clostridia	Lachnospirales	Lachnospiraceae	f__ Lachnospiraceae
ASV 69	0.00854126	UIC129	chow 2914	Bacteria	Actinobacteriota	Coriobacteriia	Coriobacteriales	Eggerthellaceae	Other <1%
ASV 7	0.00703863	UIC129	chow 2914	Bacteria	Bacteroidota	Bacteroidia	Bacteroidales	Bacteroidaceae	Other <1%
ASV 96	0.00644549	UIC129	chow 2914	Bacteria	Firmicutes	Clostridia	Lachnospirales	Lachnospiraceae	Other <1%
ASV 32	0.0058128	UIC129	chow 2914	Bacteria	Firmicutes	Clostridia	Clostridiales	Clostridiaceae	Other <1%
ASV 141	0.00577326	UIC129	chow 2914	Bacteria	Firmicutes	Clostridia	Lachnospirales	Lachnospiraceae	Other <1%
ASV 73	0.00462652	UIC129	chow 2914	Bacteria	Actinobacteriota	Coriobacteriia	Coriobacteriales	Eggerthellaceae	Other <1%
ASV 10	0.00407292	UIC129	chow 2914	Bacteria	Firmicutes	Clostridia	Peptostreptococcales-Tissierellales	Peptostreptococcaceae	Other <1%
ASV 234	0.00375657	UIC129	chow 2914	Bacteria	Firmicutes	Clostridia	Oscillospirales	Oscillospiraceae	Other <1%
ASV 439	0.0035984	UIC129	chow 2914	Bacteria	Firmicutes	Clostridia	Oscillospirales	Oscillospiraceae	Other <1%
ASV 37	0.00355886	UIC129	chow 2914	Bacteria	Firmicutes	Bacilli	Staphylococcales	Staphylococcaceae	Other <1%
ASV 406	0.00355886	UIC129	chow 2914	Bacteria	Firmicutes	Clostridia	Lachnospirales	Lachnospiraceae	Other <1%
ASV 266	0.00312389	UIC129	chow 2914	Bacteria	Firmicutes	Clostridia	Lachnospirales	Lachnospiraceae	Other <1%
ASV 315	0.00272846	UIC129	chow 2914	Bacteria	Firmicutes	Clostridia	Oscillospirales	Oscillospiraceae	Other <1%
ASV 324	0.00257029	UIC129	chow 2914	Bacteria	Firmicutes	Clostridia	Clostridia vadinBB60 group	o__ Clostridia vadinBB60 group	Other <1%
ASV 56	0.00253074	UIC129	chow 2914	Bacteria	Firmicutes	Clostridia	Lachnospirales	Lachnospiraceae	Other <1%
ASV 264	0.00241212	UIC129	chow 2914	Bacteria	Firmicutes	Bacilli	Erysipelotrichales	Erysipelotrichaceae	Other <1%
ASV 186	0.00237257	UIC129	chow 2914	Bacteria	Firmicutes	Clostridia	Oscillospirales	Ruminococcaceae	Other <1%
ASV 44	0.00177943	UIC129	chow 2914	Bacteria	Actinobacteriota	Coriobacteriia	Coriobacteriales	Eggerthellaceae	Other <1%
ASV 635	0.001384	UIC129	chow 2914	Bacteria	Firmicutes	Clostridia	Lachnospirales	Lachnospiraceae	Other <1%
ASV 800	0.00134446	UIC129	chow 2914	Bacteria	Firmicutes	Clostridia	Oscillospirales	Ruminococcaceae	Other <1%
ASV 199	0.00126537	UIC129	chow 2914	Bacteria	Firmicutes	Bacilli	c__ Bacilli	c__ Bacilli	Other <1%
ASV 386	0.00118629	UIC129	chow 2914	Bacteria	Firmicutes	Bacilli	RF39	o__ RF39	Other <1%
ASV 228	0.00114674	UIC129	chow 2914	Bacteria	Firmicutes	Clostridia	Lachnospirales	Lachnospiraceae	Other <1%
ASV 582	0.000869943	UIC129	chow 2914	Bacteria	Firmicutes	Clostridia	Lachnospirales	Lachnospiraceae	Other <1%
ASV 118	0.000830401	UIC129	chow 2914	Bacteria	Firmicutes	Clostridia	Oscillospirales	UCG-010	Other <1%
ASV 83	0.000672229	UIC129	chow 2914	Bacteria	Firmicutes	Clostridia	Lachnospirales	Lachnospiraceae	Other <1%
ASV 1108	0.000632686	UIC129	chow 2914	Bacteria	Firmicutes	Clostridia	Peptostreptococcales-Tissierellales	Anaerovoracaceae	Other <1%
ASV 364	0.000593143	UIC129	chow 2914	Bacteria	Firmicutes	Bacilli	Acholeplasmatales	Acholeplasmataceae	Other <1%
ASV 50	0.0005536	UIC129	chow 2914	Bacteria	Firmicutes	Clostridia	Monoglobales	Monoglobaceae	Other <1%
ASV 188	0.000514057	UIC129	chow 2914	Bacteria	Actinobacteriota	Actinobacteria	Bifidobacteriales	Bifidobacteriaceae	Other <1%
ASV 28	0.000474515	UIC129	chow 2914	Bacteria	Firmicutes	Bacilli	Erysipelotrichales	Erysipelatoclostridiaceae	Other <1%
ASV 131	0.000434972	UIC129	chow 2914	Bacteria	Firmicutes	Clostridia	Lachnospirales	Defluviitaleaceae	Other <1%
ASV 824	0.000395429	UIC129	chow 2914	Bacteria	Firmicutes	Clostridia	Peptococcales	Peptococcaceae	Other <1%
ASV 13	0.000355886	UIC129	chow 2914	Bacteria	Firmicutes	Bacilli	Lactobacillales	Enterococcaceae	Other <1%
ASV 405	0.000355886	UIC129	chow 2914	Bacteria	Firmicutes	Clostridia	Peptostreptococcales-Tissierellales	Anaerovoracaceae	Other <1%
ASV 663	0.000355886	UIC129	chow 2914	Bacteria	Firmicutes	Clostridia	Lachnospirales	Lachnospiraceae	Other <1%
ASV 543	0.000316343	UIC129	chow 2914	Bacteria	Firmicutes	Bacilli	Erysipelotrichales	Erysipelatoclostridiaceae	Other <1%
ASV 1225	0.000237257	UIC129	chow 2914	Bacteria	Firmicutes	Clostridia	c__ Clostridia	c__ Clostridia	Other <1%
ASV 437	0.000158172	UIC129	chow 2914	Bacteria	Firmicutes	Clostridia	Lachnospirales	Lachnospiraceae	Other <1%
ASV 506	0.000158172	UIC129	chow 2914	Bacteria	Firmicutes	Clostridia	Lachnospirales	Lachnospiraceae	Other <1%
ASV 608	0.000158172	UIC129	chow 2914	Bacteria	Firmicutes	Clostridia	Oscillospirales	Butyricicoccaceae	Other <1%
ASV 101	0.000118629	UIC129	chow 2914	Bacteria	Firmicutes	Clostridia	Oscillospirales	[Eubacterium] coprostanoligenes group	Other <1%
ASV 1067	0.000118629	UIC129	chow 2914	Bacteria	Firmicutes	Clostridia	Oscillospirales	Ruminococcaceae	Other <1%
ASV 1405	0.000118629	UIC129	chow 2914	Bacteria	Firmicutes	Firmicutes	c__ Firmicutes	c__ Firmicutes	Other <1%
ASV 169	0.000118629	UIC129	chow 2914	Bacteria	Firmicutes	Clostridia	Oscillospirales	Oscillospiraceae	Other <1%
ASV 328	0.000118629	UIC129	chow 2914	Bacteria	Firmicutes	Clostridia	Peptostreptococcales-Tissierellales	Peptostreptococcaceae	Other <1%
ASV 737	0.000118629	UIC129	chow 2914	Bacteria	Firmicutes	Clostridia	Oscillospirales	Ruminococcaceae	Other <1%
ASV 847	0.000118629	UIC129	chow 2914	Bacteria	Firmicutes	Clostridia	Oscillospirales	Oscillospiraceae	Other <1%
ASV 1150	7.90858e-05	UIC129	chow 2914	Bacteria	Actinobacteriota	Coriobacteriia	Coriobacteriales	Eggerthellaceae	Other <1%
ASV 1184	7.90858e-05	UIC129	chow 2914	Bacteria	Actinobacteriota	Coriobacteriia	Coriobacteriales	Coriobacteriales Incertae Sedis	Other <1%
ASV 176	7.90858e-05	UIC129	chow 2914	Bacteria	Firmicutes	Clostridia	Oscillospirales	Ruminococcaceae	Other <1%
ASV 6	7.90858e-05	UIC129	chow 2914	Bacteria	Firmicutes	Bacilli	Lactobacillales	Streptococcaceae	Other <1%
ASV 661	7.90858e-05	UIC129	chow 2914	Bacteria	Firmicutes	Clostridia	Peptostreptococcales-Tissierellales	Anaerovoracaceae	Other <1%
ASV 1016	3.95429e-05	UIC129	chow 2914	Bacteria	Firmicutes	Clostridia	Oscillospirales	Ruminococcaceae	Other <1%
ASV 1032	3.95429e-05	UIC129	chow 2914	Bacteria	Firmicutes	Clostridia	Lachnospirales	Lachnospiraceae	Other <1%
ASV 1141	3.95429e-05	UIC129	chow 2914	Bacteria	Firmicutes	Clostridia	Oscillospirales	Oscillospiraceae	Other <1%
ASV 133	3.95429e-05	UIC129	chow 2914	Bacteria	Firmicutes	Clostridia	Peptostreptococcales-Tissierellales	Anaerovoracaceae	Other <1%
ASV 1401	3.95429e-05	UIC129	chow 2914	Bacteria	Firmicutes	Clostridia	Peptostreptococcales-Tissierellales	Anaerovoracaceae	Other <1%
ASV 2	3.95429e-05	UIC129	chow 2914	Bacteria	Proteobacteria	Gammaproteobacteria	Enterobacterales	Enterobacteriaceae	Other <1%
ASV 742	3.95429e-05	UIC129	chow 2914	Bacteria	Cyanobacteria	Cyanobacteriia	Chloroplast	Chloroplast	Other <1%
ASV 883	3.95429e-05	UIC129	chow 2914	Bacteria	Firmicutes	Clostridia	Oscillospirales	Butyricicoccaceae	Other <1%
ASV 1	0.301151	UIC130	chow LM485	Bacteria	Firmicutes	Bacilli	Lactobacillales	Lactobacillaceae	Lactobacillus
ASV 3	0.295222	UIC130	chow LM485	Bacteria	Firmicutes	Bacilli	Erysipelotrichales	Erysipelotrichaceae	Turicibacter
ASV 5	0.105964	UIC130	chow LM485	Bacteria	Firmicutes	Bacilli	Erysipelotrichales	Erysipelotrichaceae	Dubosiella
ASV 8	0.093176	UIC130	chow LM485	Bacteria	Verrucomicrobiota	Verrucomicrobiae	Verrucomicrobiales	Akkermansiaceae	Akkermansia
ASV 43	0.0491746	UIC130	chow LM485	Bacteria	Firmicutes	Clostridia	Clostridia UCG-014	o__ Clostridia UCG-014	o__ Clostridia UCG-014
ASV 15	0.0323762	UIC130	chow LM485	Bacteria	Proteobacteria	Gammaproteobacteria	Burkholderiales	Sutterellaceae	Parasutterella
ASV 4	0.0321437	UIC130	chow LM485	Bacteria	Bacteroidota	Bacteroidia	Bacteroidales	Muribaculaceae	f__ Muribaculaceae
ASV 10	0.0288305	UIC130	chow LM485	Bacteria	Firmicutes	Clostridia	Peptostreptococcales-Tissierellales	Peptostreptococcaceae	Romboutsia
ASV 137	0.0114508	UIC130	chow LM485	Bacteria	Firmicutes	Clostridia	Lachnospirales	Lachnospiraceae	f__ Lachnospiraceae
ASV 83	0.00604511	UIC130	chow LM485	Bacteria	Firmicutes	Clostridia	Lachnospirales	Lachnospiraceae	Other <1%
ASV 406	0.0058126	UIC130	chow LM485	Bacteria	Firmicutes	Clostridia	Lachnospirales	Lachnospiraceae	Other <1%
ASV 386	0.00546385	UIC130	chow LM485	Bacteria	Firmicutes	Bacilli	RF39	o__ RF39	Other <1%
ASV 30	0.0042432	UIC130	chow LM485	Bacteria	Bacteroidota	Bacteroidia	Bacteroidales	Rikenellaceae	Other <1%
ASV 69	0.00395257	UIC130	chow LM485	Bacteria	Actinobacteriota	Coriobacteriia	Coriobacteriales	Eggerthellaceae	Other <1%
ASV 44	0.00325506	UIC130	chow LM485	Bacteria	Actinobacteriota	Coriobacteriia	Coriobacteriales	Eggerthellaceae	Other <1%
ASV 32	0.0026738	UIC130	chow LM485	Bacteria	Firmicutes	Clostridia	Clostridiales	Clostridiaceae	Other <1%
ASV 199	0.00226691	UIC130	chow LM485	Bacteria	Firmicutes	Bacilli	c__ Bacilli	c__ Bacilli	Other <1%
ASV 73	0.00220879	UIC130	chow LM485	Bacteria	Actinobacteriota	Coriobacteriia	Coriobacteriales	Eggerthellaceae	Other <1%
ASV 130	0.00209254	UIC130	chow LM485	Bacteria	Firmicutes	Clostridia	Lachnospirales	Lachnospiraceae	Other <1%
ASV 228	0.00203441	UIC130	chow LM485	Bacteria	Firmicutes	Clostridia	Lachnospirales	Lachnospiraceae	Other <1%
ASV 328	0.00127877	UIC130	chow LM485	Bacteria	Firmicutes	Clostridia	Peptostreptococcales-Tissierellales	Peptostreptococcaceae	Other <1%
ASV 131	0.000988142	UIC130	chow LM485	Bacteria	Firmicutes	Clostridia	Lachnospirales	Defluviitaleaceae	Other <1%
ASV 506	0.00087189	UIC130	chow LM485	Bacteria	Firmicutes	Clostridia	Lachnospirales	Lachnospiraceae	Other <1%
ASV 141	0.000755638	UIC130	chow LM485	Bacteria	Firmicutes	Clostridia	Lachnospirales	Lachnospiraceae	Other <1%
ASV 37	0.000639386	UIC130	chow LM485	Bacteria	Firmicutes	Bacilli	Staphylococcales	Staphylococcaceae	Other <1%
ASV 186	0.00058126	UIC130	chow LM485	Bacteria	Firmicutes	Clostridia	Oscillospirales	Ruminococcaceae	Other <1%
ASV 264	0.000523134	UIC130	chow LM485	Bacteria	Firmicutes	Bacilli	Erysipelotrichales	Erysipelotrichaceae	Other <1%
ASV 644	0.000523134	UIC130	chow LM485	Bacteria	Firmicutes	Clostridia	Peptostreptococcales-Tissierellales	Peptostreptococcaceae	Other <1%
ASV 50	0.000465008	UIC130	chow LM485	Bacteria	Firmicutes	Clostridia	Monoglobales	Monoglobaceae	Other <1%
ASV 364	0.000406882	UIC130	chow LM485	Bacteria	Firmicutes	Bacilli	Acholeplasmatales	Acholeplasmataceae	Other <1%
ASV 188	0.00029063	UIC130	chow LM485	Bacteria	Actinobacteriota	Actinobacteria	Bifidobacteriales	Bifidobacteriaceae	Other <1%
ASV 7	0.00029063	UIC130	chow LM485	Bacteria	Bacteroidota	Bacteroidia	Bacteroidales	Bacteroidaceae	Other <1%
ASV 96	0.00029063	UIC130	chow LM485	Bacteria	Firmicutes	Clostridia	Lachnospirales	Lachnospiraceae	Other <1%
ASV 118	0.000232504	UIC130	chow LM485	Bacteria	Firmicutes	Clostridia	Oscillospirales	UCG-010	Other <1%
ASV 266	0.000232504	UIC130	chow LM485	Bacteria	Firmicutes	Clostridia	Lachnospirales	Lachnospiraceae	Other <1%
ASV 27	0.000174378	UIC130	chow LM485	Bacteria	Actinobacteriota	Coriobacteriia	Coriobacteriales	Atopobiaceae	Other <1%
ASV 315	0.000174378	UIC130	chow LM485	Bacteria	Firmicutes	Clostridia	Oscillospirales	Oscillospiraceae	Other <1%
ASV 324	0.000174378	UIC130	chow LM485	Bacteria	Firmicutes	Clostridia	Clostridia vadinBB60 group	o__ Clostridia vadinBB60 group	Other <1%
ASV 582	0.000174378	UIC130	chow LM485	Bacteria	Firmicutes	Clostridia	Lachnospirales	Lachnospiraceae	Other <1%
ASV 1026	0.000116252	UIC130	chow LM485	Bacteria	Cyanobacteria	Cyanobacteriia	Chloroplast	o__ Chloroplast	Other <1%
ASV 1155	0.000116252	UIC130	chow LM485	Bacteria	Firmicutes	Clostridia	Lachnospirales	Lachnospiraceae	Other <1%
ASV 1184	0.000116252	UIC130	chow LM485	Bacteria	Actinobacteriota	Coriobacteriia	Coriobacteriales	Coriobacteriales Incertae Sedis	Other <1%
ASV 1225	0.000116252	UIC130	chow LM485	Bacteria	Firmicutes	Clostridia	c__ Clostridia	c__ Clostridia	Other <1%
ASV 1405	0.000116252	UIC130	chow LM485	Bacteria	Firmicutes	Firmicutes	c__ Firmicutes	c__ Firmicutes	Other <1%
ASV 56	0.000116252	UIC130	chow LM485	Bacteria	Firmicutes	Clostridia	Lachnospirales	Lachnospiraceae	Other <1%
ASV 11	5.8126e-05	UIC130	chow LM485	Bacteria	Proteobacteria	Gammaproteobacteria	Enterobacterales	Enterobacteriaceae	Other <1%
ASV 1108	5.8126e-05	UIC130	chow LM485	Bacteria	Firmicutes	Clostridia	Peptostreptococcales-Tissierellales	Anaerovoracaceae	Other <1%
ASV 1150	5.8126e-05	UIC130	chow LM485	Bacteria	Actinobacteriota	Coriobacteriia	Coriobacteriales	Eggerthellaceae	Other <1%
ASV 1482	5.8126e-05	UIC130	chow LM485	Bacteria	Firmicutes	Clostridia	Lachnospirales	Lachnospiraceae	Other <1%
ASV 176	5.8126e-05	UIC130	chow LM485	Bacteria	Firmicutes	Clostridia	Oscillospirales	Ruminococcaceae	Other <1%
ASV 234	5.8126e-05	UIC130	chow LM485	Bacteria	Firmicutes	Clostridia	Oscillospirales	Oscillospiraceae	Other <1%
ASV 28	5.8126e-05	UIC130	chow LM485	Bacteria	Firmicutes	Bacilli	Erysipelotrichales	Erysipelatoclostridiaceae	Other <1%
ASV 439	5.8126e-05	UIC130	chow LM485	Bacteria	Firmicutes	Clostridia	Oscillospirales	Oscillospiraceae	Other <1%
ASV 6	5.8126e-05	UIC130	chow LM485	Bacteria	Firmicutes	Bacilli	Lactobacillales	Streptococcaceae	Other <1%
ASV 635	5.8126e-05	UIC130	chow LM485	Bacteria	Firmicutes	Clostridia	Lachnospirales	Lachnospiraceae	Other <1%
ASV 661	5.8126e-05	UIC130	chow LM485	Bacteria	Firmicutes	Clostridia	Peptostreptococcales-Tissierellales	Anaerovoracaceae	Other <1%
ASV 663	5.8126e-05	UIC130	chow LM485	Bacteria	Firmicutes	Clostridia	Lachnospirales	Lachnospiraceae	Other <1%
ASV 1	0.381043	UIC130	chow 2914	Bacteria	Firmicutes	Bacilli	Lactobacillales	Lactobacillaceae	Lactobacillus
ASV 4	0.22207	UIC130	chow 2914	Bacteria	Bacteroidota	Bacteroidia	Bacteroidales	Muribaculaceae	f__ Muribaculaceae
ASV 3	0.15929	UIC130	chow 2914	Bacteria	Firmicutes	Bacilli	Erysipelotrichales	Erysipelotrichaceae	Turicibacter
ASV 5	0.0701032	UIC130	chow 2914	Bacteria	Firmicutes	Bacilli	Erysipelotrichales	Erysipelotrichaceae	Dubosiella
ASV 15	0.0279216	UIC130	chow 2914	Bacteria	Proteobacteria	Gammaproteobacteria	Burkholderiales	Sutterellaceae	Parasutterella
ASV 30	0.0242597	UIC130	chow 2914	Bacteria	Bacteroidota	Bacteroidia	Bacteroidales	Rikenellaceae	Alistipes
ASV 8	0.0241189	UIC130	chow 2914	Bacteria	Verrucomicrobiota	Verrucomicrobiae	Verrucomicrobiales	Akkermansiaceae	Akkermansia
ASV 43	0.0188726	UIC130	chow 2914	Bacteria	Firmicutes	Clostridia	Clostridia UCG-014	o__ Clostridia UCG-014	o__ Clostridia UCG-014
ASV 73	0.00915461	UIC130	chow 2914	Bacteria	Actinobacteriota	Coriobacteriia	Coriobacteriales	Eggerthellaceae	Other <1%
ASV 69	0.00767579	UIC130	chow 2914	Bacteria	Actinobacteriota	Coriobacteriia	Coriobacteriales	Eggerthellaceae	Other <1%
ASV 130	0.0073589	UIC130	chow 2914	Bacteria	Firmicutes	Clostridia	Lachnospirales	Lachnospiraceae	Other <1%
ASV 7	0.00517587	UIC130	chow 2914	Bacteria	Bacteroidota	Bacteroidia	Bacteroidales	Bacteroidaceae	Other <1%
ASV 137	0.00394352	UIC130	chow 2914	Bacteria	Firmicutes	Clostridia	Lachnospirales	Lachnospiraceae	Other <1%
ASV 32	0.00320411	UIC130	chow 2914	Bacteria	Firmicutes	Clostridia	Clostridiales	Clostridiaceae	Other <1%
ASV 44	0.00320411	UIC130	chow 2914	Bacteria	Actinobacteriota	Coriobacteriia	Coriobacteriales	Eggerthellaceae	Other <1%
ASV 264	0.0031689	UIC130	chow 2914	Bacteria	Firmicutes	Bacilli	Erysipelotrichales	Erysipelotrichaceae	Other <1%
ASV 406	0.00278159	UIC130	chow 2914	Bacteria	Firmicutes	Clostridia	Lachnospirales	Lachnospiraceae	Other <1%
ASV 50	0.00278159	UIC130	chow 2914	Bacteria	Firmicutes	Clostridia	Monoglobales	Monoglobaceae	Other <1%
ASV 199	0.00207739	UIC130	chow 2914	Bacteria	Firmicutes	Bacilli	c__ Bacilli	c__ Bacilli	Other <1%
ASV 10	0.00151403	UIC130	chow 2914	Bacteria	Firmicutes	Clostridia	Peptostreptococcales-Tissierellales	Peptostreptococcaceae	Other <1%
ASV 101	0.00151403	UIC130	chow 2914	Bacteria	Firmicutes	Clostridia	Oscillospirales	[Eubacterium] coprostanoligenes group	Other <1%
ASV 582	0.00137319	UIC130	chow 2914	Bacteria	Firmicutes	Clostridia	Lachnospirales	Lachnospiraceae	Other <1%
ASV 141	0.00130277	UIC130	chow 2914	Bacteria	Firmicutes	Clostridia	Lachnospirales	Lachnospiraceae	Other <1%
ASV 96	0.00119714	UIC130	chow 2914	Bacteria	Firmicutes	Clostridia	Lachnospirales	Lachnospiraceae	Other <1%
ASV 37	0.00116193	UIC130	chow 2914	Bacteria	Firmicutes	Bacilli	Staphylococcales	Staphylococcaceae	Other <1%
ASV 56	0.00116193	UIC130	chow 2914	Bacteria	Firmicutes	Clostridia	Lachnospirales	Lachnospiraceae	Other <1%
ASV 83	0.00112672	UIC130	chow 2914	Bacteria	Firmicutes	Clostridia	Lachnospirales	Lachnospiraceae	Other <1%
ASV 188	0.000915461	UIC130	chow 2914	Bacteria	Actinobacteriota	Actinobacteria	Bifidobacteriales	Bifidobacteriaceae	Other <1%
ASV 315	0.000915461	UIC130	chow 2914	Bacteria	Firmicutes	Clostridia	Oscillospirales	Oscillospiraceae	Other <1%
ASV 386	0.000915461	UIC130	chow 2914	Bacteria	Firmicutes	Bacilli	RF39	o__ RF39	Other <1%
ASV 234	0.000880251	UIC130	chow 2914	Bacteria	Firmicutes	Clostridia	Oscillospirales	Oscillospiraceae	Other <1%
ASV 228	0.000845041	UIC130	chow 2914	Bacteria	Firmicutes	Clostridia	Lachnospirales	Lachnospiraceae	Other <1%
ASV 131	0.000809831	UIC130	chow 2914	Bacteria	Firmicutes	Clostridia	Lachnospirales	Defluviitaleaceae	Other <1%
ASV 118	0.000774621	UIC130	chow 2914	Bacteria	Firmicutes	Clostridia	Oscillospirales	UCG-010	Other <1%
ASV 186	0.000704201	UIC130	chow 2914	Bacteria	Firmicutes	Clostridia	Oscillospirales	Ruminococcaceae	Other <1%
ASV 324	0.00059857	UIC130	chow 2914	Bacteria	Firmicutes	Clostridia	Clostridia vadinBB60 group	o__ Clostridia vadinBB60 group	Other <1%
ASV 364	0.00049294	UIC130	chow 2914	Bacteria	Firmicutes	Bacilli	Acholeplasmatales	Acholeplasmataceae	Other <1%
ASV 800	0.0003521	UIC130	chow 2914	Bacteria	Firmicutes	Clostridia	Oscillospirales	Ruminococcaceae	Other <1%
ASV 28	0.00031689	UIC130	chow 2914	Bacteria	Firmicutes	Bacilli	Erysipelotrichales	Erysipelatoclostridiaceae	Other <1%
ASV 543	0.00031689	UIC130	chow 2914	Bacteria	Firmicutes	Bacilli	Erysipelotrichales	Erysipelatoclostridiaceae	Other <1%
ASV 1150	0.00024647	UIC130	chow 2914	Bacteria	Actinobacteriota	Coriobacteriia	Coriobacteriales	Eggerthellaceae	Other <1%
ASV 439	0.00024647	UIC130	chow 2914	Bacteria	Firmicutes	Clostridia	Oscillospirales	Oscillospiraceae	Other <1%
ASV 824	0.00024647	UIC130	chow 2914	Bacteria	Firmicutes	Clostridia	Peptococcales	Peptococcaceae	Other <1%
ASV 266	0.00021126	UIC130	chow 2914	Bacteria	Firmicutes	Clostridia	Lachnospirales	Lachnospiraceae	Other <1%
ASV 1225	0.00017605	UIC130	chow 2914	Bacteria	Firmicutes	Clostridia	c__ Clostridia	c__ Clostridia	Other <1%
ASV 1108	0.00014084	UIC130	chow 2914	Bacteria	Firmicutes	Clostridia	Peptostreptococcales-Tissierellales	Anaerovoracaceae	Other <1%
ASV 635	0.00014084	UIC130	chow 2914	Bacteria	Firmicutes	Clostridia	Lachnospirales	Lachnospiraceae	Other <1%
ASV 737	0.00014084	UIC130	chow 2914	Bacteria	Firmicutes	Clostridia	Oscillospirales	Ruminococcaceae	Other <1%
ASV 1405	0.00010563	UIC130	chow 2914	Bacteria	Firmicutes	Firmicutes	c__ Firmicutes	c__ Firmicutes	Other <1%
ASV 405	0.00010563	UIC130	chow 2914	Bacteria	Firmicutes	Clostridia	Peptostreptococcales-Tissierellales	Anaerovoracaceae	Other <1%
ASV 644	0.00010563	UIC130	chow 2914	Bacteria	Firmicutes	Clostridia	Peptostreptococcales-Tissierellales	Peptostreptococcaceae	Other <1%
ASV 663	0.00010563	UIC130	chow 2914	Bacteria	Firmicutes	Clostridia	Lachnospirales	Lachnospiraceae	Other <1%
ASV 1026	7.04201e-05	UIC130	chow 2914	Bacteria	Cyanobacteria	Cyanobacteriia	Chloroplast	o__ Chloroplast	Other <1%
ASV 1184	7.04201e-05	UIC130	chow 2914	Bacteria	Actinobacteriota	Coriobacteriia	Coriobacteriales	Coriobacteriales Incertae Sedis	Other <1%
ASV 133	7.04201e-05	UIC130	chow 2914	Bacteria	Firmicutes	Clostridia	Peptostreptococcales-Tissierellales	Anaerovoracaceae	Other <1%
ASV 1372	7.04201e-05	UIC130	chow 2914	Bacteria	Firmicutes	Clostridia	Oscillospirales	o__ Oscillospirales	Other <1%
ASV 169	7.04201e-05	UIC130	chow 2914	Bacteria	Firmicutes	Clostridia	Oscillospirales	Oscillospiraceae	Other <1%
ASV 506	7.04201e-05	UIC130	chow 2914	Bacteria	Firmicutes	Clostridia	Lachnospirales	Lachnospiraceae	Other <1%
ASV 1141	3.521e-05	UIC130	chow 2914	Bacteria	Firmicutes	Clostridia	Oscillospirales	Oscillospiraceae	Other <1%
ASV 1155	3.521e-05	UIC130	chow 2914	Bacteria	Firmicutes	Clostridia	Lachnospirales	Lachnospiraceae	Other <1%
ASV 1275	3.521e-05	UIC130	chow 2914	Bacteria	Firmicutes	Clostridia	Lachnospirales	Lachnospiraceae	Other <1%
ASV 2	3.521e-05	UIC130	chow 2914	Bacteria	Proteobacteria	Gammaproteobacteria	Enterobacterales	Enterobacteriaceae	Other <1%
ASV 328	3.521e-05	UIC130	chow 2914	Bacteria	Firmicutes	Clostridia	Peptostreptococcales-Tissierellales	Peptostreptococcaceae	Other <1%
ASV 437	3.521e-05	UIC130	chow 2914	Bacteria	Firmicutes	Clostridia	Lachnospirales	Lachnospiraceae	Other <1%
ASV 1	0.308153	UIC131	chow LM485	Bacteria	Firmicutes	Bacilli	Lactobacillales	Lactobacillaceae	Lactobacillus
ASV 3	0.197042	UIC131	chow LM485	Bacteria	Firmicutes	Bacilli	Erysipelotrichales	Erysipelotrichaceae	Turicibacter
ASV 4	0.16216	UIC131	chow LM485	Bacteria	Bacteroidota	Bacteroidia	Bacteroidales	Muribaculaceae	f__ Muribaculaceae
ASV 5	0.111455	UIC131	chow LM485	Bacteria	Firmicutes	Bacilli	Erysipelotrichales	Erysipelotrichaceae	Dubosiella
ASV 30	0.0643275	UIC131	chow LM485	Bacteria	Bacteroidota	Bacteroidia	Bacteroidales	Rikenellaceae	Alistipes
ASV 8	0.0443756	UIC131	chow LM485	Bacteria	Verrucomicrobiota	Verrucomicrobiae	Verrucomicrobiales	Akkermansiaceae	Akkermansia
ASV 43	0.0263502	UIC131	chow LM485	Bacteria	Firmicutes	Clostridia	Clostridia UCG-014	o__ Clostridia UCG-014	o__ Clostridia UCG-014
ASV 15	0.0208462	UIC131	chow LM485	Bacteria	Proteobacteria	Gammaproteobacteria	Burkholderiales	Sutterellaceae	Parasutterella
ASV 137	0.00935673	UIC131	chow LM485	Bacteria	Firmicutes	Clostridia	Lachnospirales	Lachnospiraceae	Other <1%
ASV 10	0.00619195	UIC131	chow LM485	Bacteria	Firmicutes	Clostridia	Peptostreptococcales-Tissierellales	Peptostreptococcaceae	Other <1%
ASV 130	0.00509116	UIC131	chow LM485	Bacteria	Firmicutes	Clostridia	Lachnospirales	Lachnospiraceae	Other <1%
ASV 406	0.00364637	UIC131	chow LM485	Bacteria	Firmicutes	Clostridia	Lachnospirales	Lachnospiraceae	Other <1%
ASV 7	0.00330237	UIC131	chow LM485	Bacteria	Bacteroidota	Bacteroidia	Bacteroidales	Bacteroidaceae	Other <1%
ASV 118	0.00316477	UIC131	chow LM485	Bacteria	Firmicutes	Clostridia	Oscillospirales	UCG-010	Other <1%
ASV 28	0.00309598	UIC131	chow LM485	Bacteria	Firmicutes	Bacilli	Erysipelotrichales	Erysipelatoclostridiaceae	Other <1%
ASV 69	0.00261438	UIC131	chow LM485	Bacteria	Actinobacteriota	Coriobacteriia	Coriobacteriales	Eggerthellaceae	Other <1%
ASV 96	0.00254558	UIC131	chow LM485	Bacteria	Firmicutes	Clostridia	Lachnospirales	Lachnospiraceae	Other <1%
ASV 44	0.00213278	UIC131	chow LM485	Bacteria	Actinobacteriota	Coriobacteriia	Coriobacteriales	Eggerthellaceae	Other <1%
ASV 73	0.00213278	UIC131	chow LM485	Bacteria	Actinobacteriota	Coriobacteriia	Coriobacteriales	Eggerthellaceae	Other <1%
ASV 315	0.00206398	UIC131	chow LM485	Bacteria	Firmicutes	Clostridia	Oscillospirales	Oscillospiraceae	Other <1%
ASV 228	0.00192638	UIC131	chow LM485	Bacteria	Firmicutes	Clostridia	Lachnospirales	Lachnospiraceae	Other <1%
ASV 386	0.00171999	UIC131	chow LM485	Bacteria	Firmicutes	Bacilli	RF39	o__ RF39	Other <1%
ASV 506	0.00171999	UIC131	chow LM485	Bacteria	Firmicutes	Clostridia	Lachnospirales	Lachnospiraceae	Other <1%
ASV 199	0.00130719	UIC131	chow LM485	Bacteria	Firmicutes	Bacilli	c__ Bacilli	c__ Bacilli	Other <1%
ASV 234	0.00130719	UIC131	chow LM485	Bacteria	Firmicutes	Clostridia	Oscillospirales	Oscillospiraceae	Other <1%
ASV 264	0.00123839	UIC131	chow LM485	Bacteria	Firmicutes	Bacilli	Erysipelotrichales	Erysipelotrichaceae	Other <1%
ASV 83	0.00110079	UIC131	chow LM485	Bacteria	Firmicutes	Clostridia	Lachnospirales	Lachnospiraceae	Other <1%
ASV 324	0.00103199	UIC131	chow LM485	Bacteria	Firmicutes	Clostridia	Clostridia vadinBB60 group	o__ Clostridia vadinBB60 group	Other <1%
ASV 186	0.000825593	UIC131	chow LM485	Bacteria	Firmicutes	Clostridia	Oscillospirales	Ruminococcaceae	Other <1%
ASV 131	0.000687994	UIC131	chow LM485	Bacteria	Firmicutes	Clostridia	Lachnospirales	Defluviitaleaceae	Other <1%
ASV 364	0.000687994	UIC131	chow LM485	Bacteria	Firmicutes	Bacilli	Acholeplasmatales	Acholeplasmataceae	Other <1%
ASV 56	0.000687994	UIC131	chow LM485	Bacteria	Firmicutes	Clostridia	Lachnospirales	Lachnospiraceae	Other <1%
ASV 32	0.000619195	UIC131	chow LM485	Bacteria	Firmicutes	Clostridia	Clostridiales	Clostridiaceae	Other <1%
ASV 328	0.000550396	UIC131	chow LM485	Bacteria	Firmicutes	Clostridia	Peptostreptococcales-Tissierellales	Peptostreptococcaceae	Other <1%
ASV 141	0.000412797	UIC131	chow LM485	Bacteria	Firmicutes	Clostridia	Lachnospirales	Lachnospiraceae	Other <1%
ASV 439	0.000412797	UIC131	chow LM485	Bacteria	Firmicutes	Clostridia	Oscillospirales	Oscillospiraceae	Other <1%
ASV 800	0.000412797	UIC131	chow LM485	Bacteria	Firmicutes	Clostridia	Oscillospirales	Ruminococcaceae	Other <1%
ASV 169	0.000343997	UIC131	chow LM485	Bacteria	Firmicutes	Clostridia	Oscillospirales	Oscillospiraceae	Other <1%
ASV 188	0.000275198	UIC131	chow LM485	Bacteria	Actinobacteriota	Actinobacteria	Bifidobacteriales	Bifidobacteriaceae	Other <1%
ASV 1225	0.000206398	UIC131	chow LM485	Bacteria	Firmicutes	Clostridia	c__ Clostridia	c__ Clostridia	Other <1%
ASV 176	0.000206398	UIC131	chow LM485	Bacteria	Firmicutes	Clostridia	Oscillospirales	Ruminococcaceae	Other <1%
ASV 37	0.000206398	UIC131	chow LM485	Bacteria	Firmicutes	Bacilli	Staphylococcales	Staphylococcaceae	Other <1%
ASV 50	0.000206398	UIC131	chow LM485	Bacteria	Firmicutes	Clostridia	Monoglobales	Monoglobaceae	Other <1%
ASV 266	0.000137599	UIC131	chow LM485	Bacteria	Firmicutes	Clostridia	Lachnospirales	Lachnospiraceae	Other <1%
ASV 294	0.000137599	UIC131	chow LM485	Bacteria	Firmicutes	Clostridia	Lachnospirales	Lachnospiraceae	Other <1%
ASV 582	0.000137599	UIC131	chow LM485	Bacteria	Firmicutes	Clostridia	Lachnospirales	Lachnospiraceae	Other <1%
ASV 663	0.000137599	UIC131	chow LM485	Bacteria	Firmicutes	Clostridia	Lachnospirales	Lachnospiraceae	Other <1%
ASV 824	0.000137599	UIC131	chow LM485	Bacteria	Firmicutes	Clostridia	Peptococcales	Peptococcaceae	Other <1%
ASV 1016	6.87994e-05	UIC131	chow LM485	Bacteria	Firmicutes	Clostridia	Oscillospirales	Ruminococcaceae	Other <1%
ASV 1026	6.87994e-05	UIC131	chow LM485	Bacteria	Cyanobacteria	Cyanobacteriia	Chloroplast	o__ Chloroplast	Other <1%
ASV 1130	6.87994e-05	UIC131	chow LM485	Bacteria	Proteobacteria	Alphaproteobacteria	Rickettsiales	Mitochondria	Other <1%
ASV 1184	6.87994e-05	UIC131	chow LM485	Bacteria	Actinobacteriota	Coriobacteriia	Coriobacteriales	Coriobacteriales Incertae Sedis	Other <1%
ASV 13	6.87994e-05	UIC131	chow LM485	Bacteria	Firmicutes	Bacilli	Lactobacillales	Enterococcaceae	Other <1%
ASV 133	6.87994e-05	UIC131	chow LM485	Bacteria	Firmicutes	Clostridia	Peptostreptococcales-Tissierellales	Anaerovoracaceae	Other <1%
ASV 1405	6.87994e-05	UIC131	chow LM485	Bacteria	Firmicutes	Firmicutes	c__ Firmicutes	c__ Firmicutes	Other <1%
ASV 1482	6.87994e-05	UIC131	chow LM485	Bacteria	Firmicutes	Clostridia	Lachnospirales	Lachnospiraceae	Other <1%
ASV 27	6.87994e-05	UIC131	chow LM485	Bacteria	Actinobacteriota	Coriobacteriia	Coriobacteriales	Atopobiaceae	Other <1%
ASV 405	6.87994e-05	UIC131	chow LM485	Bacteria	Firmicutes	Clostridia	Peptostreptococcales-Tissierellales	Anaerovoracaceae	Other <1%
ASV 437	6.87994e-05	UIC131	chow LM485	Bacteria	Firmicutes	Clostridia	Lachnospirales	Lachnospiraceae	Other <1%
ASV 543	6.87994e-05	UIC131	chow LM485	Bacteria	Firmicutes	Bacilli	Erysipelotrichales	Erysipelatoclostridiaceae	Other <1%
ASV 635	6.87994e-05	UIC131	chow LM485	Bacteria	Firmicutes	Clostridia	Lachnospirales	Lachnospiraceae	Other <1%
ASV 644	6.87994e-05	UIC131	chow LM485	Bacteria	Firmicutes	Clostridia	Peptostreptococcales-Tissierellales	Peptostreptococcaceae	Other <1%
ASV 661	6.87994e-05	UIC131	chow LM485	Bacteria	Firmicutes	Clostridia	Peptostreptococcales-Tissierellales	Anaerovoracaceae	Other <1%
ASV 742	6.87994e-05	UIC131	chow LM485	Bacteria	Cyanobacteria	Cyanobacteriia	Chloroplast	Chloroplast	Other <1%
ASV 965	6.87994e-05	UIC131	chow LM485	Bacteria	Actinobacteriota	Coriobacteriia	Coriobacteriales	Eggerthellaceae	Other <1%
ASV 1	0.335565	UIC131	chow 2914	Bacteria	Firmicutes	Bacilli	Lactobacillales	Lactobacillaceae	Lactobacillus
ASV 3	0.263084	UIC131	chow 2914	Bacteria	Firmicutes	Bacilli	Erysipelotrichales	Erysipelotrichaceae	Turicibacter
ASV 4	0.190073	UIC131	chow 2914	Bacteria	Bacteroidota	Bacteroidia	Bacteroidales	Muribaculaceae	f__ Muribaculaceae
ASV 43	0.0373568	UIC131	chow 2914	Bacteria	Firmicutes	Clostridia	Clostridia UCG-014	o__ Clostridia UCG-014	o__ Clostridia UCG-014
ASV 5	0.035301	UIC131	chow 2914	Bacteria	Firmicutes	Bacilli	Erysipelotrichales	Erysipelotrichaceae	Dubosiella
ASV 30	0.023906	UIC131	chow 2914	Bacteria	Bacteroidota	Bacteroidia	Bacteroidales	Rikenellaceae	Alistipes
ASV 8	0.0133333	UIC131	chow 2914	Bacteria	Verrucomicrobiota	Verrucomicrobiae	Verrucomicrobiales	Akkermansiaceae	Akkermansia
ASV 130	0.0108076	UIC131	chow 2914	Bacteria	Firmicutes	Clostridia	Lachnospirales	Lachnospiraceae	Lachnospiraceae NK4A136 group
ASV 32	0.00986784	UIC131	chow 2914	Bacteria	Firmicutes	Clostridia	Clostridiales	Clostridiaceae	Other <1%
ASV 15	0.00963289	UIC131	chow 2914	Bacteria	Proteobacteria	Gammaproteobacteria	Burkholderiales	Sutterellaceae	Other <1%
ASV 10	0.00910426	UIC131	chow 2914	Bacteria	Firmicutes	Clostridia	Peptostreptococcales-Tissierellales	Peptostreptococcaceae	Other <1%
ASV 137	0.0066373	UIC131	chow 2914	Bacteria	Firmicutes	Clostridia	Lachnospirales	Lachnospiraceae	Other <1%
ASV 96	0.00640235	UIC131	chow 2914	Bacteria	Firmicutes	Clostridia	Lachnospirales	Lachnospiraceae	Other <1%
ASV 69	0.00552129	UIC131	chow 2914	Bacteria	Actinobacteriota	Coriobacteriia	Coriobacteriales	Eggerthellaceae	Other <1%
ASV 73	0.00464023	UIC131	chow 2914	Bacteria	Actinobacteriota	Coriobacteriia	Coriobacteriales	Eggerthellaceae	Other <1%
ASV 37	0.00375918	UIC131	chow 2914	Bacteria	Firmicutes	Bacilli	Staphylococcales	Staphylococcaceae	Other <1%
ASV 50	0.00346549	UIC131	chow 2914	Bacteria	Firmicutes	Clostridia	Monoglobales	Monoglobaceae	Other <1%
ASV 386	0.00276065	UIC131	chow 2914	Bacteria	Firmicutes	Bacilli	RF39	o__ RF39	Other <1%
ASV 56	0.00270191	UIC131	chow 2914	Bacteria	Firmicutes	Clostridia	Lachnospirales	Lachnospiraceae	Other <1%
ASV 406	0.00246696	UIC131	chow 2914	Bacteria	Firmicutes	Clostridia	Lachnospirales	Lachnospiraceae	Other <1%
ASV 141	0.00217327	UIC131	chow 2914	Bacteria	Firmicutes	Clostridia	Lachnospirales	Lachnospiraceae	Other <1%
ASV 7	0.00193833	UIC131	chow 2914	Bacteria	Bacteroidota	Bacteroidia	Bacteroidales	Bacteroidaceae	Other <1%
ASV 44	0.00187959	UIC131	chow 2914	Bacteria	Actinobacteriota	Coriobacteriia	Coriobacteriales	Eggerthellaceae	Other <1%
ASV 264	0.00170338	UIC131	chow 2914	Bacteria	Firmicutes	Bacilli	Erysipelotrichales	Erysipelotrichaceae	Other <1%
ASV 234	0.00164464	UIC131	chow 2914	Bacteria	Firmicutes	Clostridia	Oscillospirales	Oscillospiraceae	Other <1%
ASV 315	0.0015859	UIC131	chow 2914	Bacteria	Firmicutes	Clostridia	Oscillospirales	Oscillospiraceae	Other <1%
ASV 186	0.00111601	UIC131	chow 2914	Bacteria	Firmicutes	Clostridia	Oscillospirales	Ruminococcaceae	Other <1%
ASV 439	0.000939794	UIC131	chow 2914	Bacteria	Firmicutes	Clostridia	Oscillospirales	Oscillospiraceae	Other <1%
ASV 83	0.000881057	UIC131	chow 2914	Bacteria	Firmicutes	Clostridia	Lachnospirales	Lachnospiraceae	Other <1%
ASV 1130	0.000763583	UIC131	chow 2914	Bacteria	Proteobacteria	Alphaproteobacteria	Rickettsiales	Mitochondria	Other <1%
ASV 199	0.000704846	UIC131	chow 2914	Bacteria	Firmicutes	Bacilli	c__ Bacilli	c__ Bacilli	Other <1%
ASV 543	0.000704846	UIC131	chow 2914	Bacteria	Firmicutes	Bacilli	Erysipelotrichales	Erysipelatoclostridiaceae	Other <1%
ASV 1026	0.000646109	UIC131	chow 2914	Bacteria	Cyanobacteria	Cyanobacteriia	Chloroplast	o__ Chloroplast	Other <1%
ASV 266	0.000646109	UIC131	chow 2914	Bacteria	Firmicutes	Clostridia	Lachnospirales	Lachnospiraceae	Other <1%
ASV 437	0.000646109	UIC131	chow 2914	Bacteria	Firmicutes	Clostridia	Lachnospirales	Lachnospiraceae	Other <1%
ASV 800	0.000646109	UIC131	chow 2914	Bacteria	Firmicutes	Clostridia	Oscillospirales	Ruminococcaceae	Other <1%
ASV 118	0.000469897	UIC131	chow 2914	Bacteria	Firmicutes	Clostridia	Oscillospirales	UCG-010	Other <1%
ASV 1225	0.00041116	UIC131	chow 2914	Bacteria	Firmicutes	Clostridia	c__ Clostridia	c__ Clostridia	Other <1%
ASV 324	0.00041116	UIC131	chow 2914	Bacteria	Firmicutes	Clostridia	Clostridia vadinBB60 group	o__ Clostridia vadinBB60 group	Other <1%
ASV 228	0.000352423	UIC131	chow 2914	Bacteria	Firmicutes	Clostridia	Lachnospirales	Lachnospiraceae	Other <1%
ASV 188	0.000293686	UIC131	chow 2914	Bacteria	Actinobacteriota	Actinobacteria	Bifidobacteriales	Bifidobacteriaceae	Other <1%
ASV 1108	0.000234949	UIC131	chow 2914	Bacteria	Firmicutes	Clostridia	Peptostreptococcales-Tissierellales	Anaerovoracaceae	Other <1%
ASV 506	0.000234949	UIC131	chow 2914	Bacteria	Firmicutes	Clostridia	Lachnospirales	Lachnospiraceae	Other <1%
ASV 582	0.000234949	UIC131	chow 2914	Bacteria	Firmicutes	Clostridia	Lachnospirales	Lachnospiraceae	Other <1%
ASV 661	0.000234949	UIC131	chow 2914	Bacteria	Firmicutes	Clostridia	Peptostreptococcales-Tissierellales	Anaerovoracaceae	Other <1%
ASV 847	0.000234949	UIC131	chow 2914	Bacteria	Firmicutes	Clostridia	Oscillospirales	Oscillospiraceae	Other <1%
ASV 824	0.000176211	UIC131	chow 2914	Bacteria	Firmicutes	Clostridia	Peptococcales	Peptococcaceae	Other <1%
ASV 1149	0.000117474	UIC131	chow 2914	Bacteria	Firmicutes	Clostridia	Lachnospirales	Lachnospiraceae	Other <1%
ASV 13	0.000117474	UIC131	chow 2914	Bacteria	Firmicutes	Bacilli	Lactobacillales	Enterococcaceae	Other <1%
ASV 27	0.000117474	UIC131	chow 2914	Bacteria	Actinobacteriota	Coriobacteriia	Coriobacteriales	Atopobiaceae	Other <1%
ASV 28	0.000117474	UIC131	chow 2914	Bacteria	Firmicutes	Bacilli	Erysipelotrichales	Erysipelatoclostridiaceae	Other <1%
ASV 328	0.000117474	UIC131	chow 2914	Bacteria	Firmicutes	Clostridia	Peptostreptococcales-Tissierellales	Peptostreptococcaceae	Other <1%
ASV 405	0.000117474	UIC131	chow 2914	Bacteria	Firmicutes	Clostridia	Peptostreptococcales-Tissierellales	Anaerovoracaceae	Other <1%
ASV 608	0.000117474	UIC131	chow 2914	Bacteria	Firmicutes	Clostridia	Oscillospirales	Butyricicoccaceae	Other <1%
ASV 644	0.000117474	UIC131	chow 2914	Bacteria	Firmicutes	Clostridia	Peptostreptococcales-Tissierellales	Peptostreptococcaceae	Other <1%
ASV 737	0.000117474	UIC131	chow 2914	Bacteria	Firmicutes	Clostridia	Oscillospirales	Ruminococcaceae	Other <1%
ASV 101	5.87372e-05	UIC131	chow 2914	Bacteria	Firmicutes	Clostridia	Oscillospirales	[Eubacterium] coprostanoligenes group	Other <1%
ASV 1016	5.87372e-05	UIC131	chow 2914	Bacteria	Firmicutes	Clostridia	Oscillospirales	Ruminococcaceae	Other <1%
ASV 1067	5.87372e-05	UIC131	chow 2914	Bacteria	Firmicutes	Clostridia	Oscillospirales	Ruminococcaceae	Other <1%
ASV 1184	5.87372e-05	UIC131	chow 2914	Bacteria	Actinobacteriota	Coriobacteriia	Coriobacteriales	Coriobacteriales Incertae Sedis	Other <1%
ASV 1435	5.87372e-05	UIC131	chow 2914	Bacteria	Proteobacteria	Gammaproteobacteria	Burkholderiales	Comamonadaceae	Other <1%
ASV 169	5.87372e-05	UIC131	chow 2914	Bacteria	Firmicutes	Clostridia	Oscillospirales	Oscillospiraceae	Other <1%
ASV 176	5.87372e-05	UIC131	chow 2914	Bacteria	Firmicutes	Clostridia	Oscillospirales	Ruminococcaceae	Other <1%
ASV 2	5.87372e-05	UIC131	chow 2914	Bacteria	Proteobacteria	Gammaproteobacteria	Enterobacterales	Enterobacteriaceae	Other <1%
ASV 364	5.87372e-05	UIC131	chow 2914	Bacteria	Firmicutes	Bacilli	Acholeplasmatales	Acholeplasmataceae	Other <1%
ASV 635	5.87372e-05	UIC131	chow 2914	Bacteria	Firmicutes	Clostridia	Lachnospirales	Lachnospiraceae	Other <1%
ASV 663	5.87372e-05	UIC131	chow 2914	Bacteria	Firmicutes	Clostridia	Lachnospirales	Lachnospiraceae	Other <1%
